# Supplementary material
Source: PubMed Central journal article supplement (PMC1256000)
Supplement: plntphys_pp.105.068254_1.pdf [file plntphys_pp.105.068254_1.pdf]

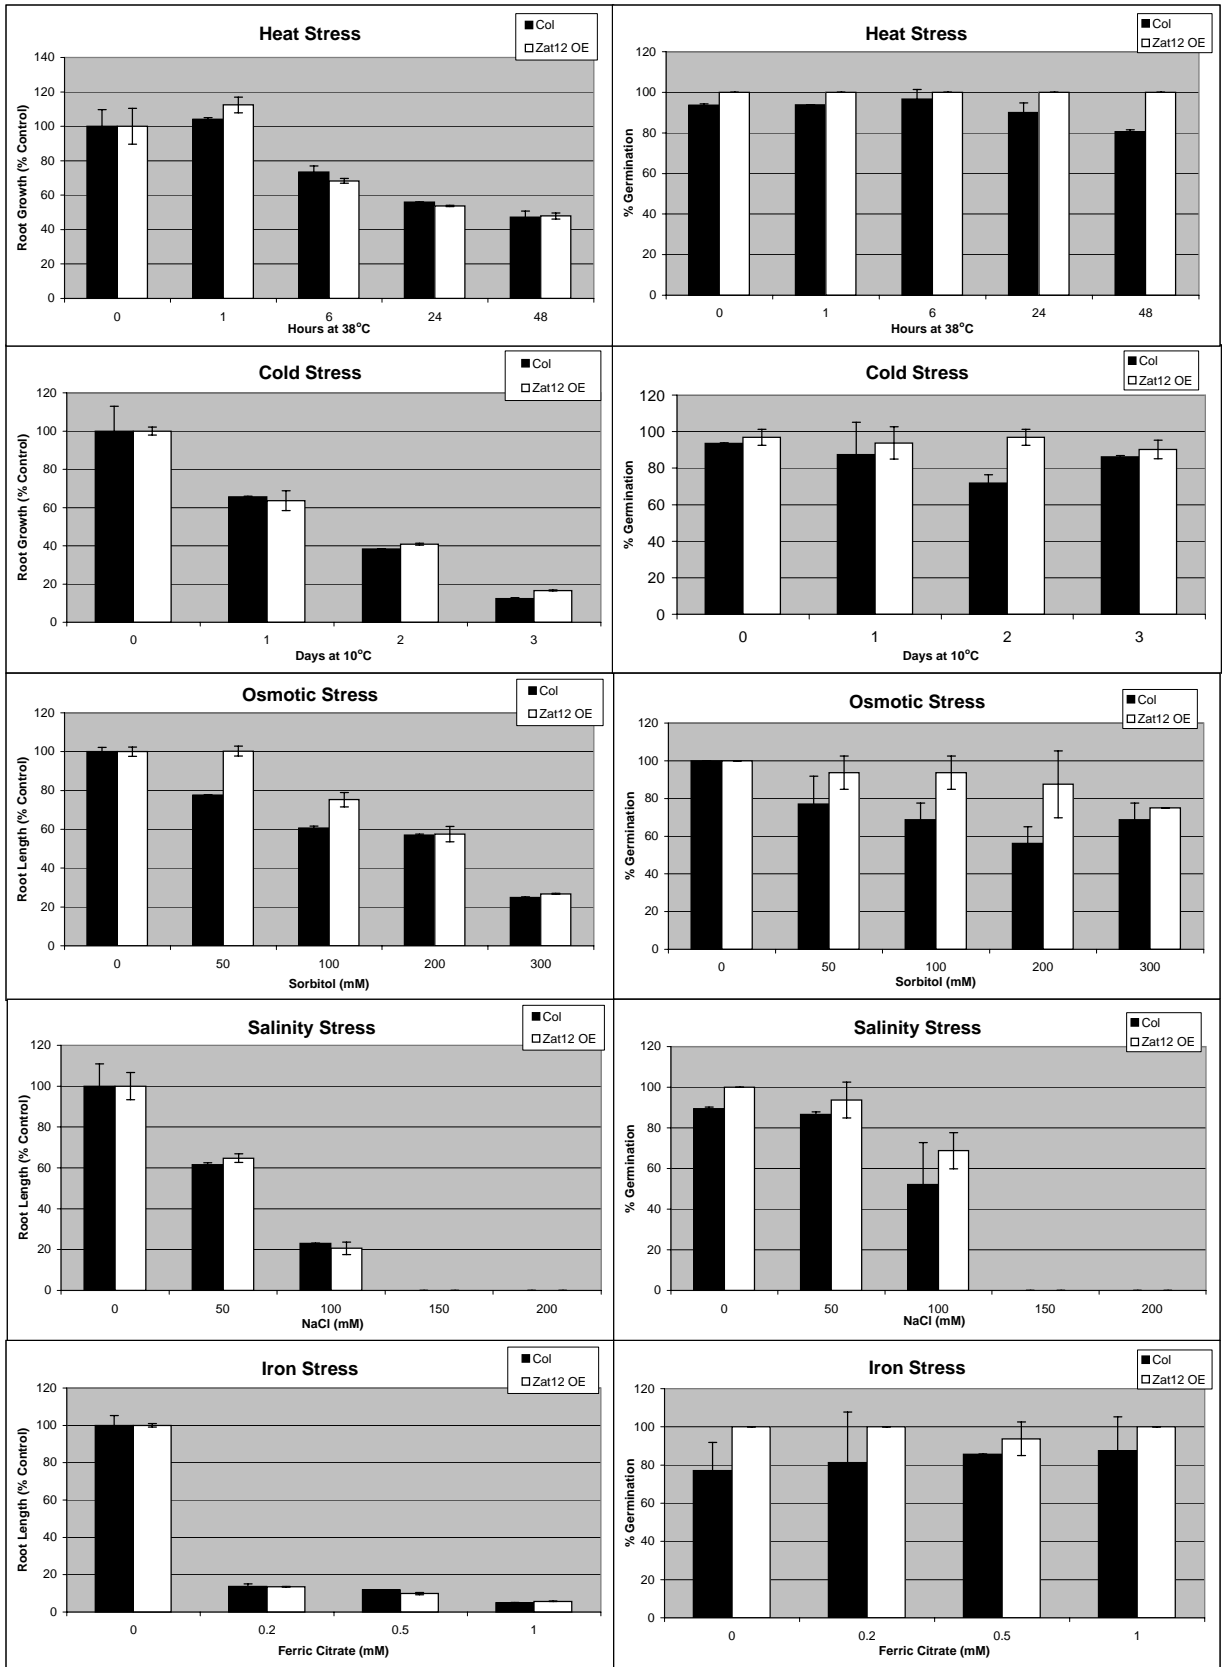

Suppl. Fig. 1. Tolerance of Zat12 over-expressing (OE) seedlings to abiotic stresses

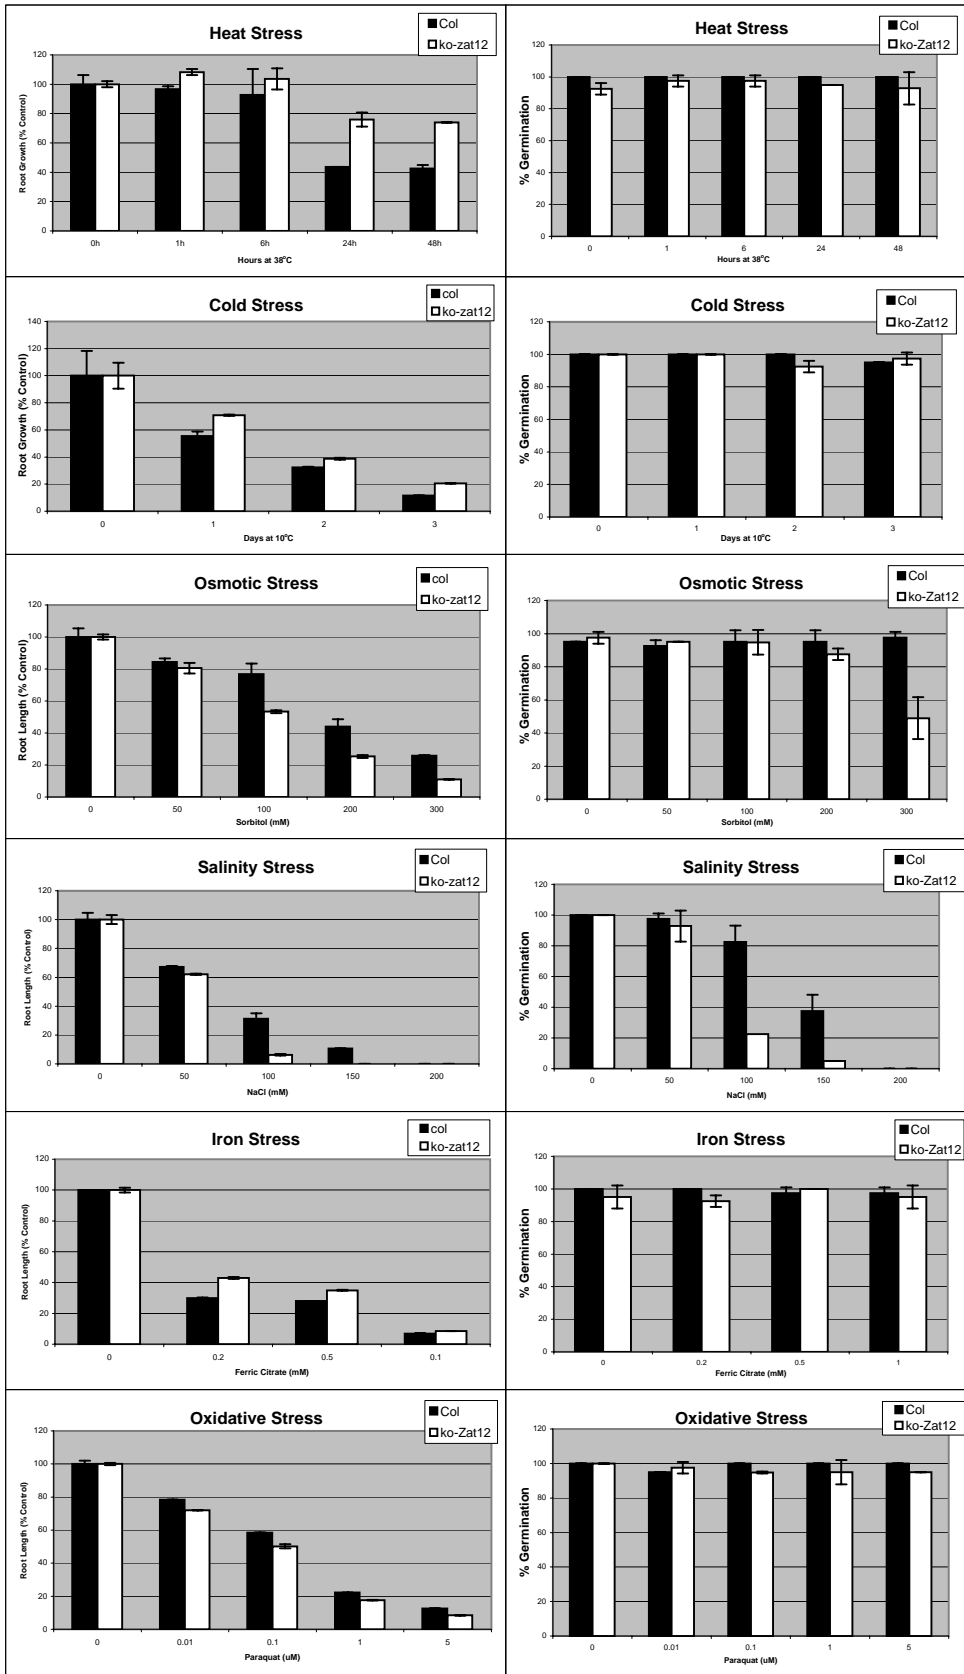

Suppl. Fig. 2. Tolerance of Zat12 knockout (KO-Zat12) seedlings to abiotic stresses

# Boxplots of Intensities Before RMA

Supp Fig. 3

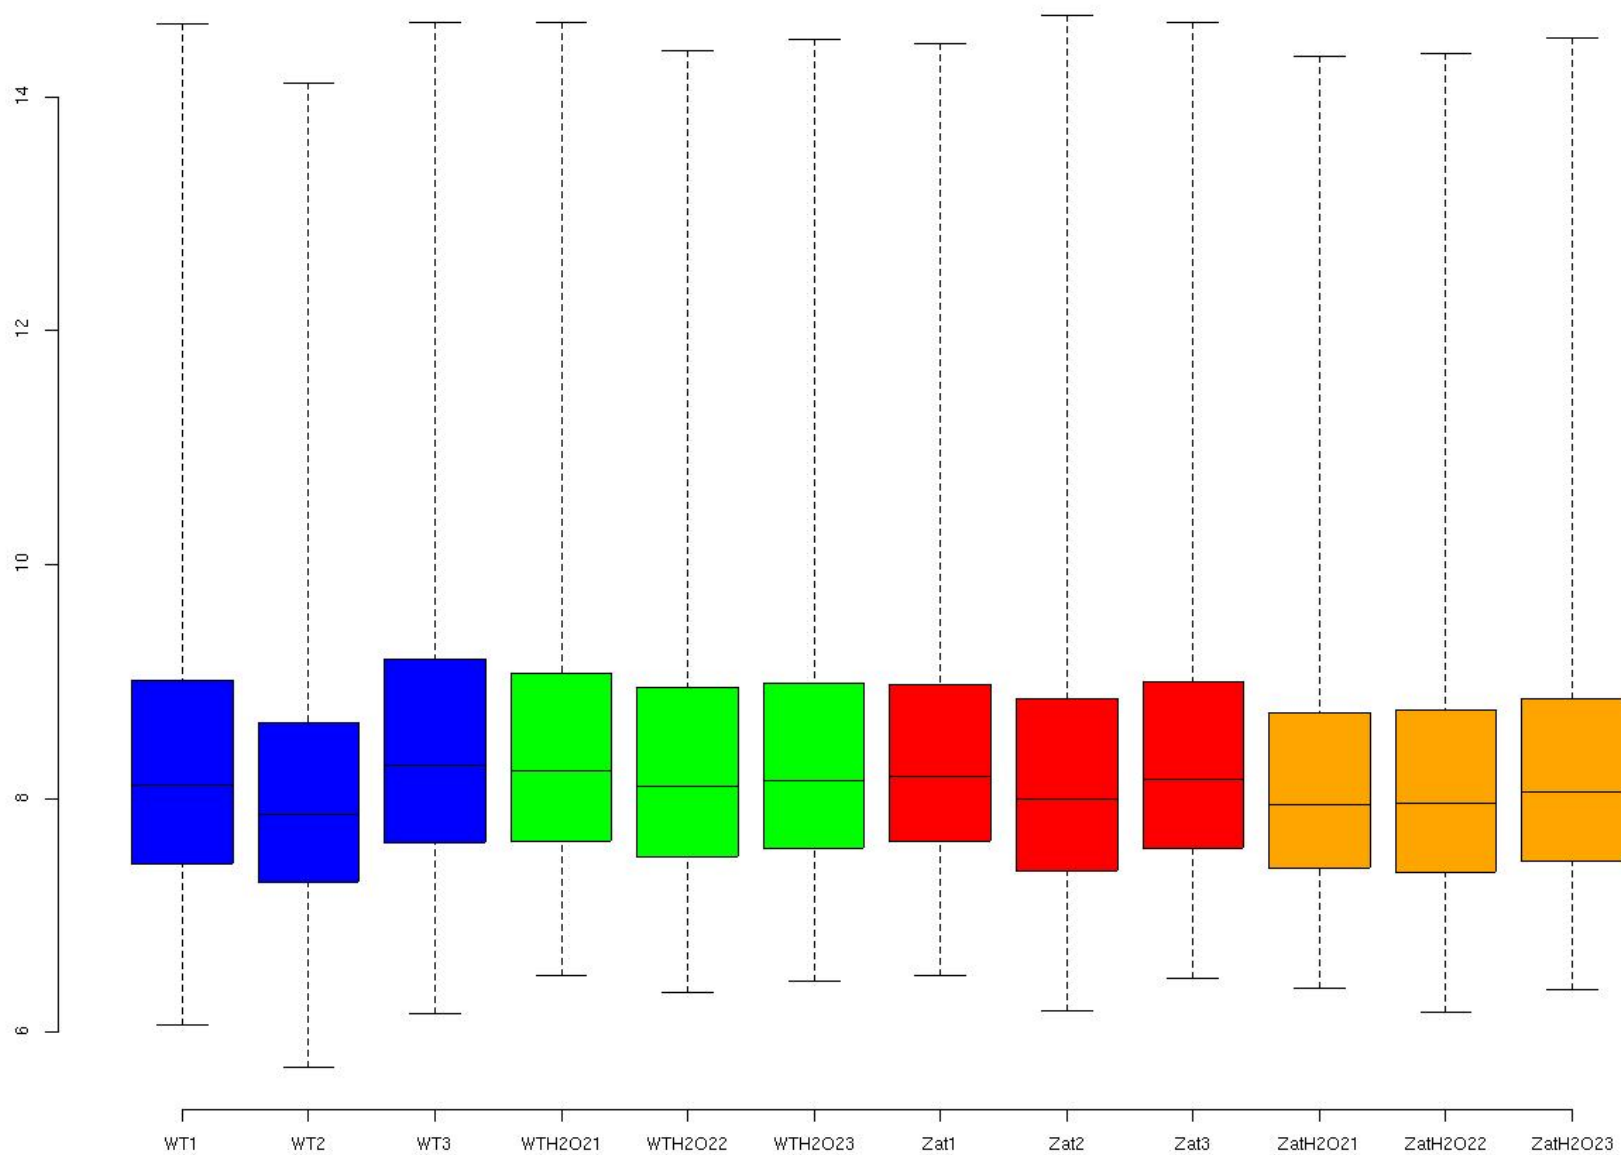

Boxplots of Intensities After RMA

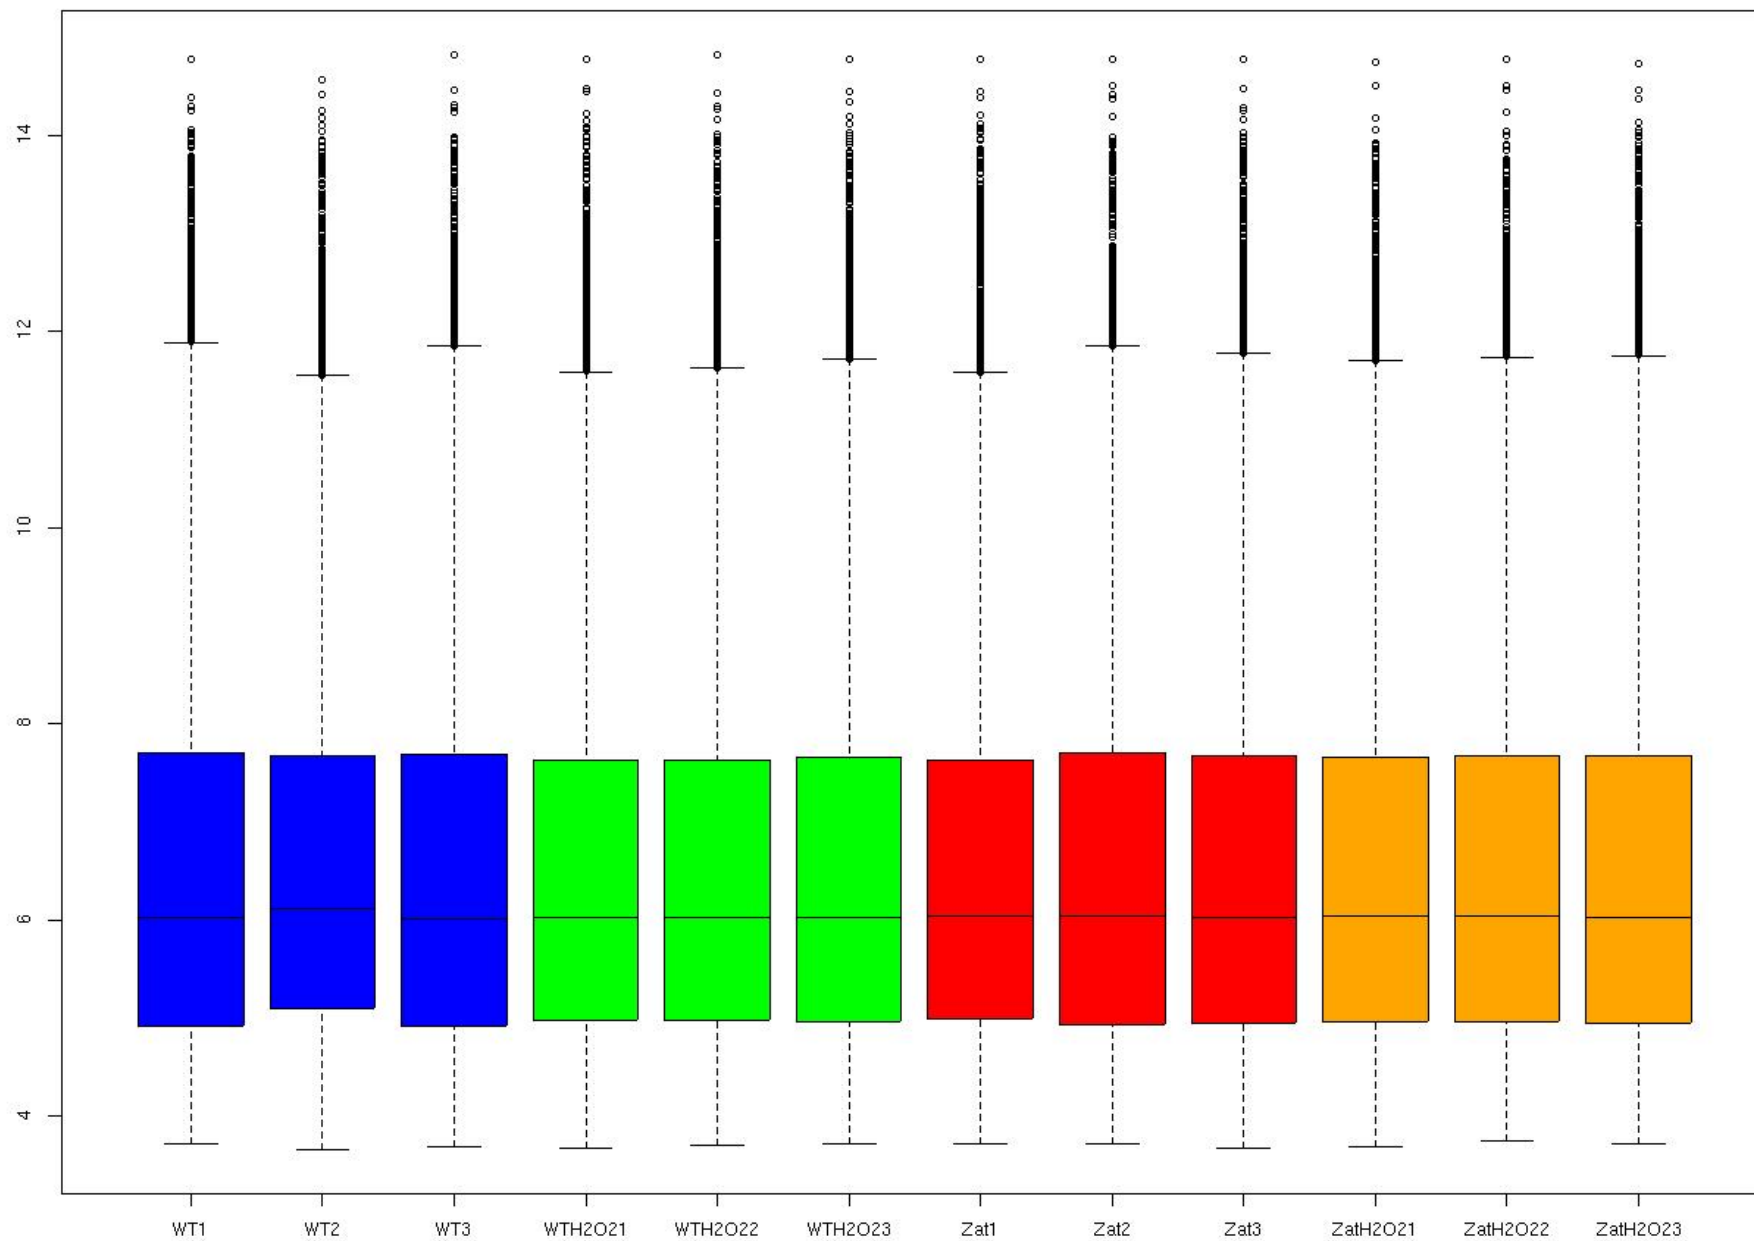

# Supp Fig. 5

Intensity Distributions of All 12 Zat Experiment Arrays Before RMA

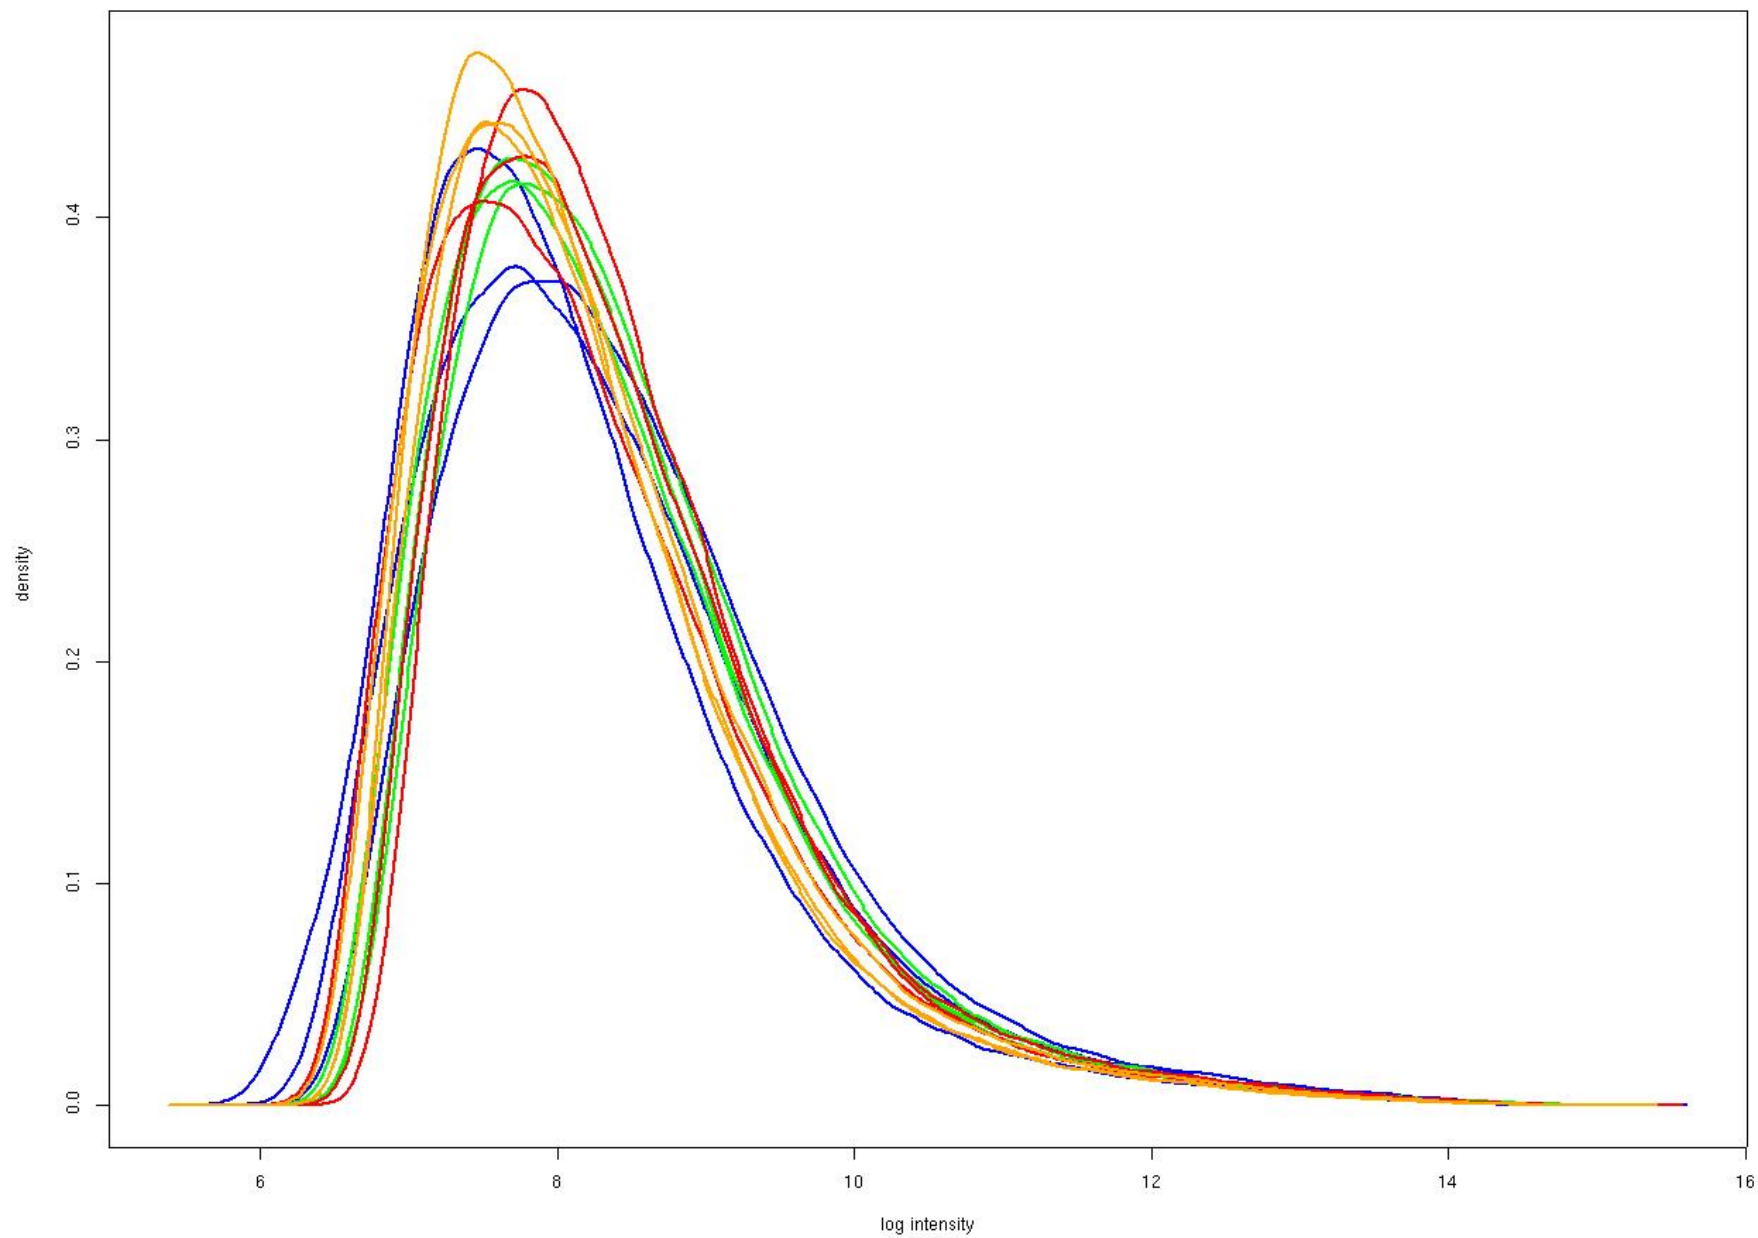

Intensity Distributions of All 12 Zat Experiment Arrays After RMA

Supp Fig. 6

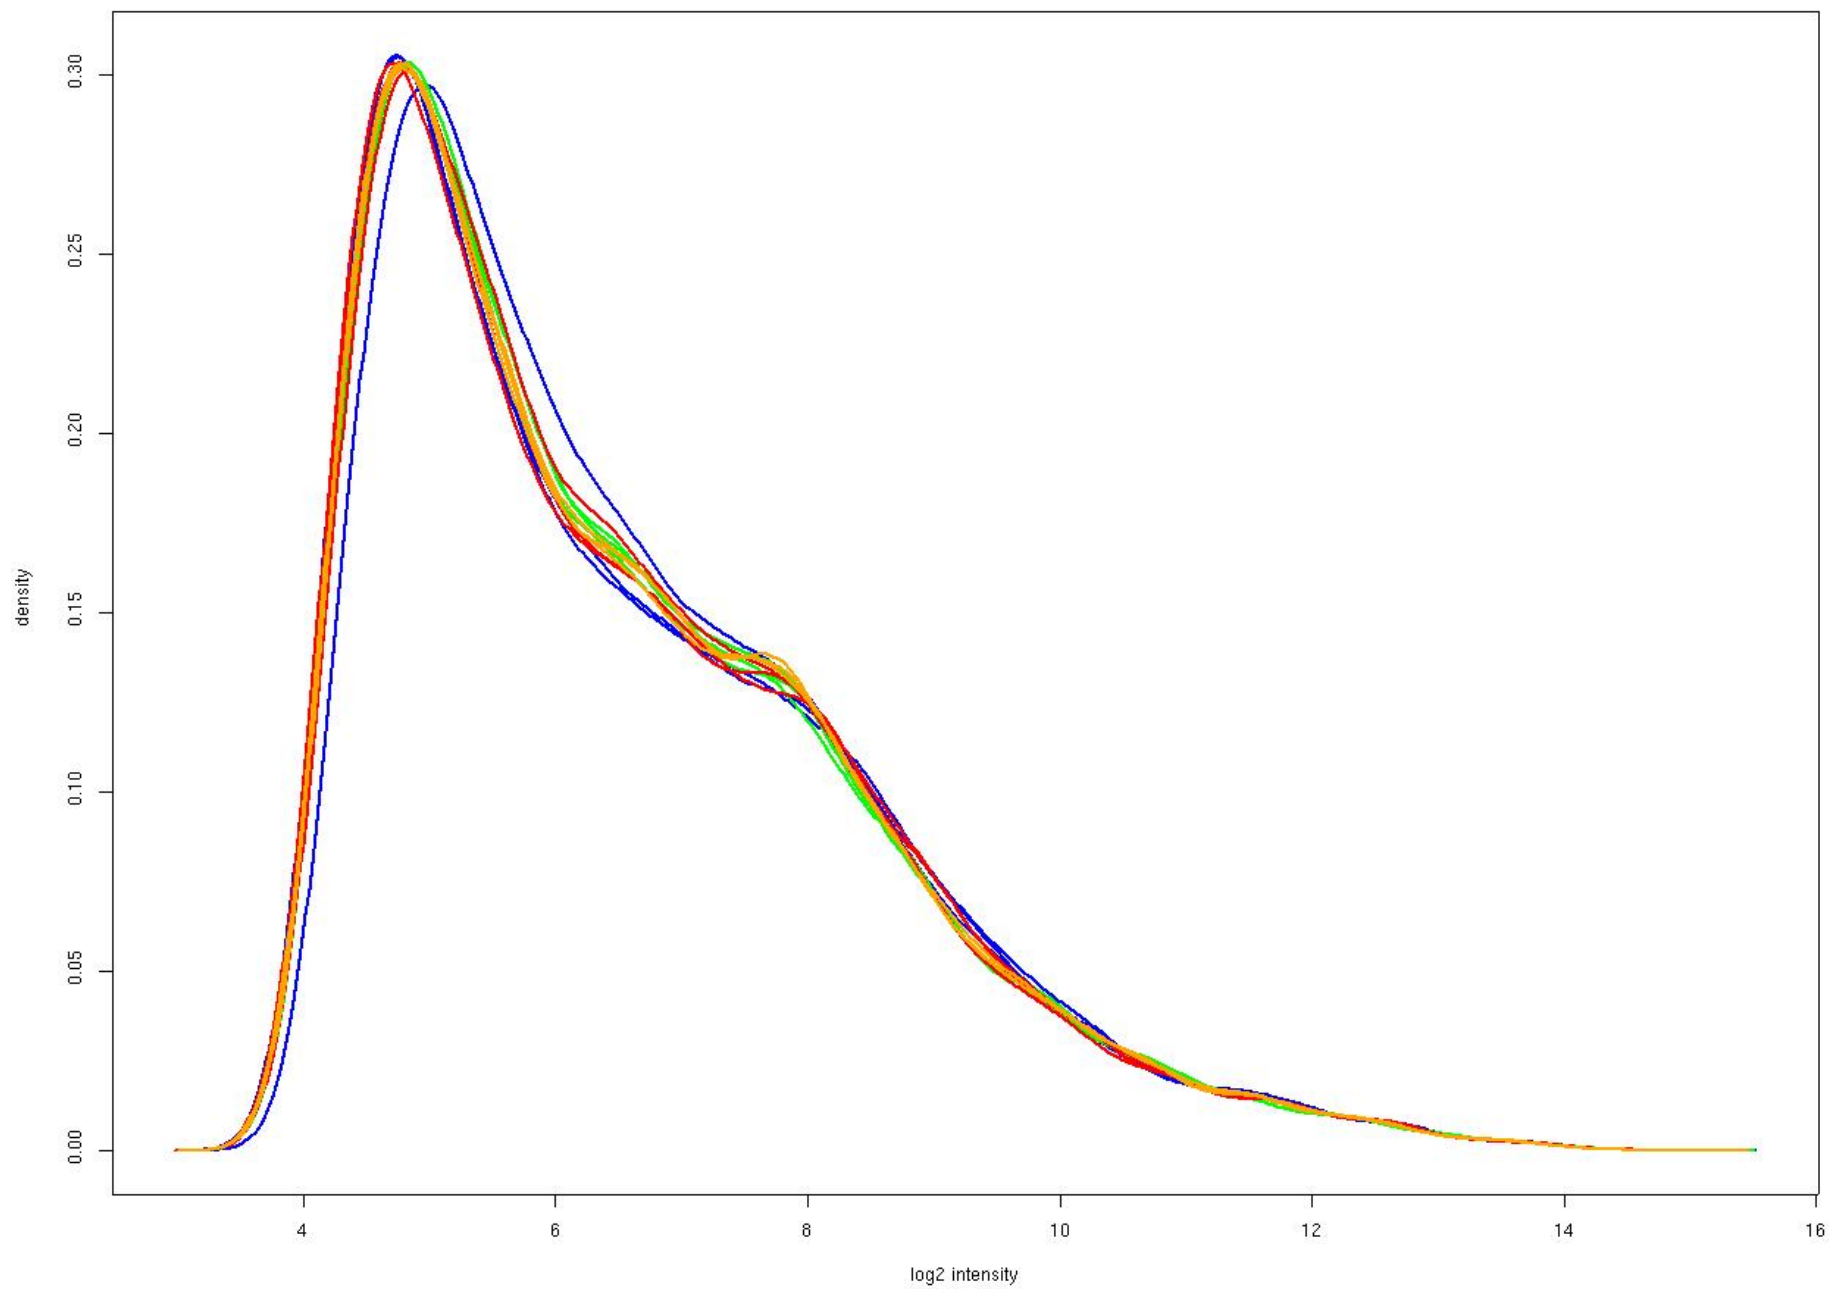

RNA digestion plot

Supp Fig. 7

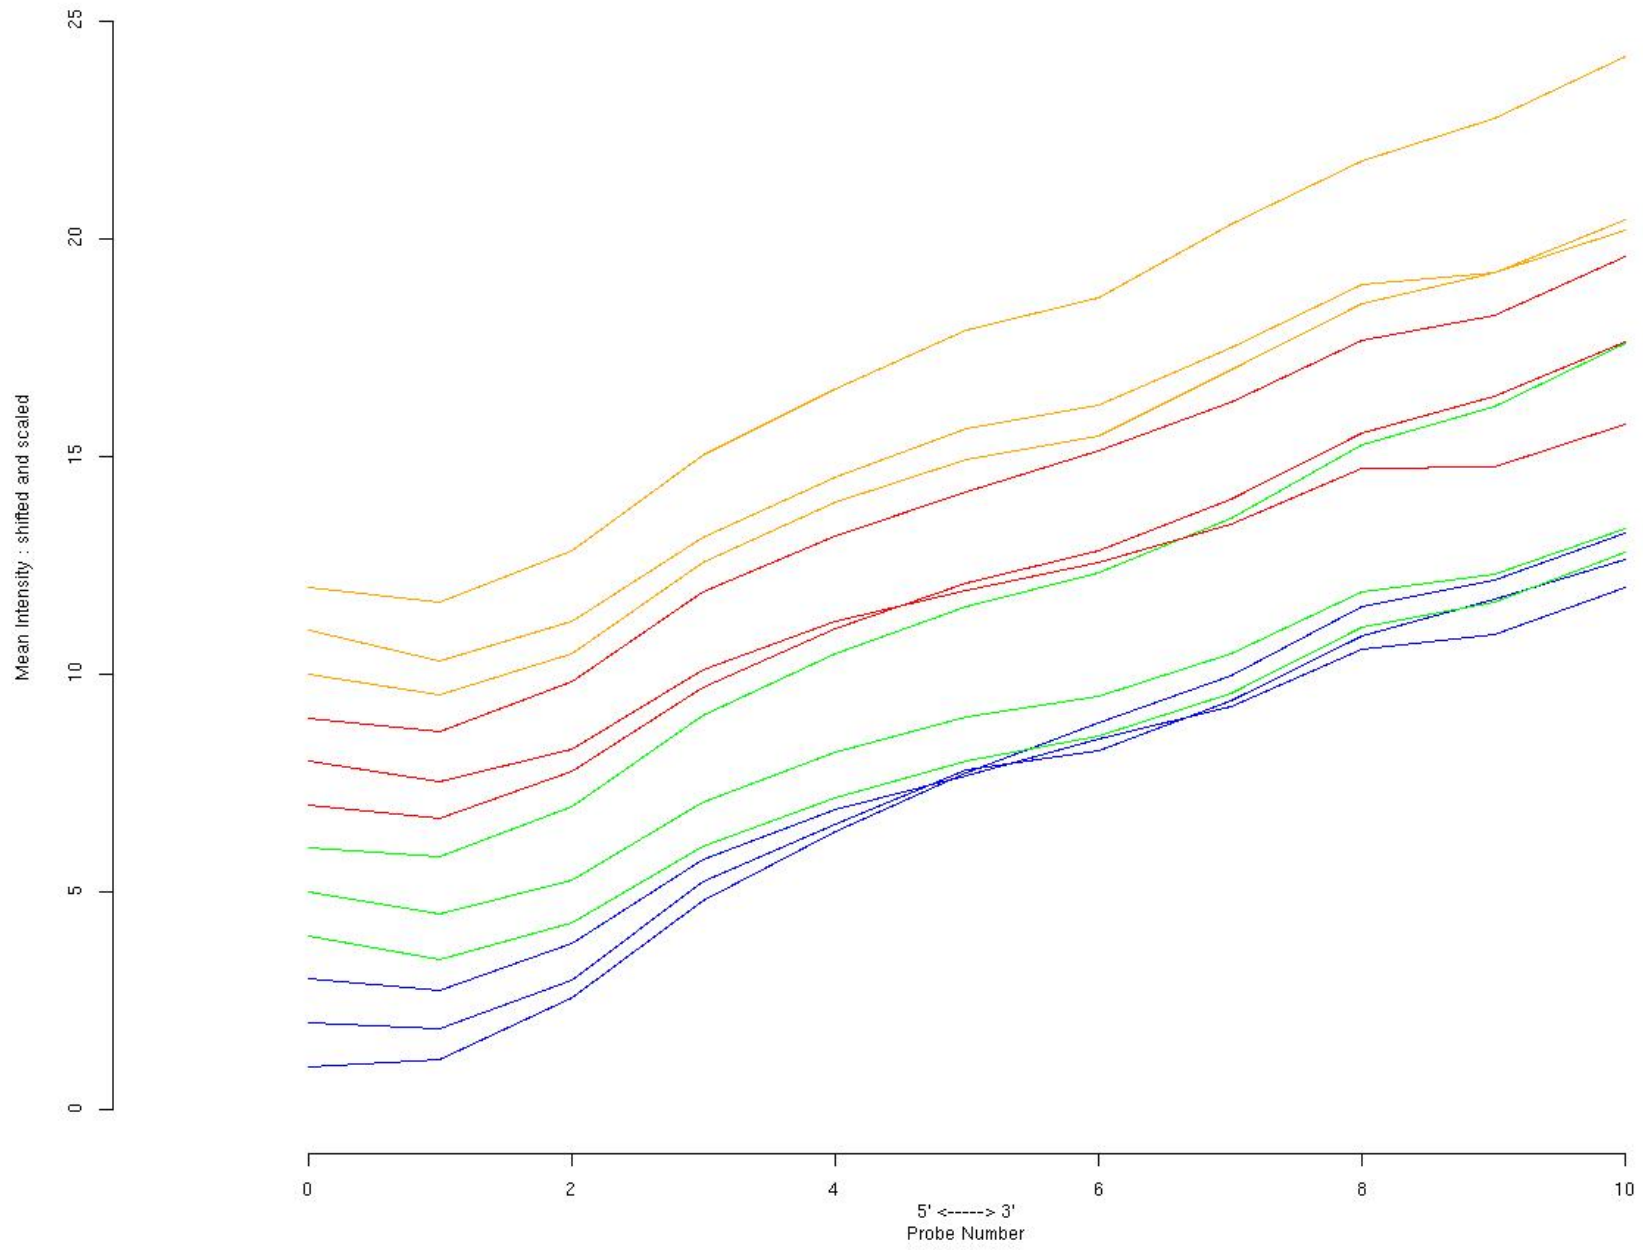

# One Replicate Graph

Supp Fig. 8

Replicates of ZatH2O2.Day1.CEL After RMA

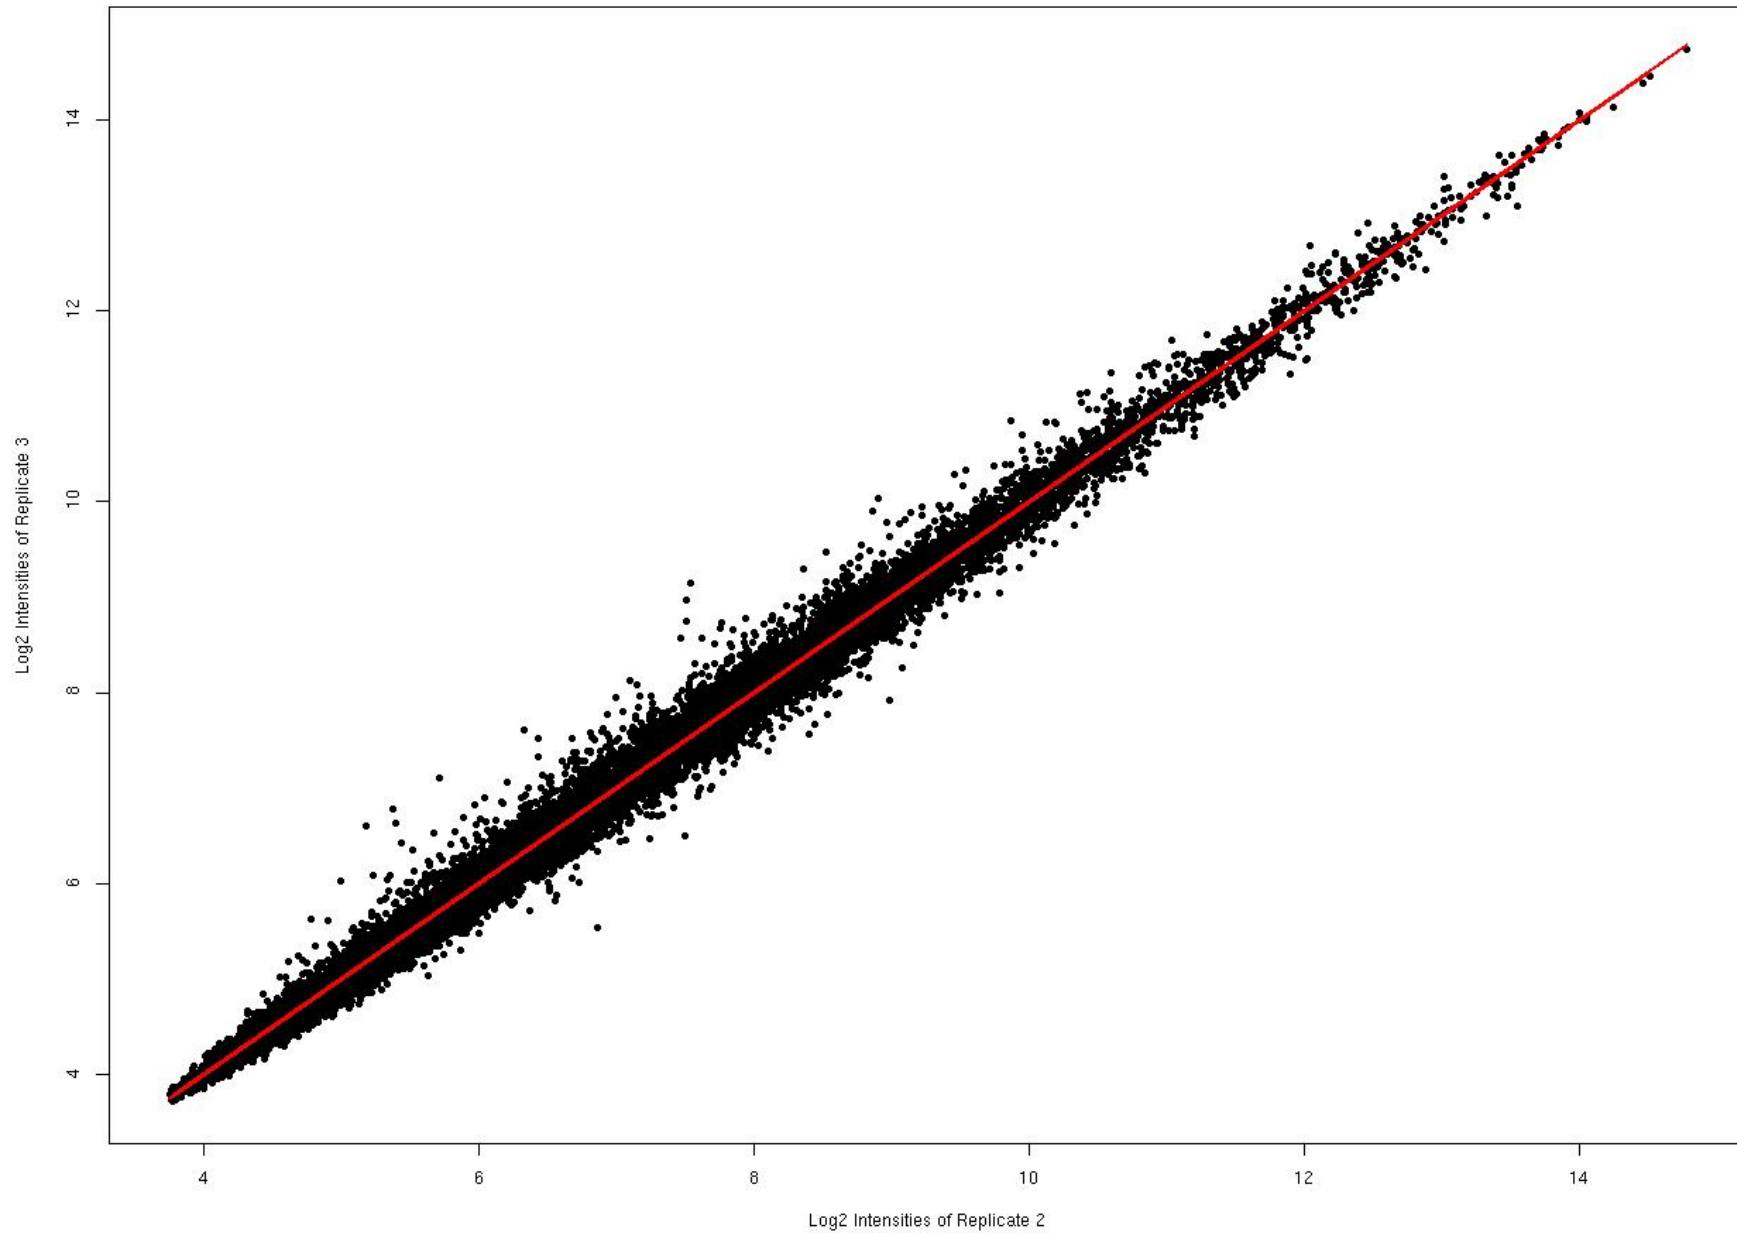



## Pearson and Spearman Correlation Coefficients of Biological Reps

| Experiment   | P_R1R2 | P_R1R3 | P_R2R3 | S_R1R2 | S_R1R3 | S_R2R3 |
|--------------|--------|--------|--------|--------|--------|--------|
| WT.Day1      | 0.989  | 0.996  | 0.989  | 0.985  | 0.996  | 0.985  |
| WTH2O2.Day1  | 0.995  | 0.996  | 0.998  | 0.995  | 0.996  | 0.997  |
| Zat.Day1     | 0.996  | 0.997  | 0.996  | 0.995  | 0.996  | 0.996  |
| ZatH2O2.Day1 | 0.996  | 0.996  | 0.996  | 0.995  | 0.995  | 0.996  |

**Supp Table 2.** Transcripts significantly elevated/suppressed (>2-fold) in wild type plants treated with hydrogen peroxide (20mM, 1h)

| Array Element | Locus Identifier          | Annotation                                                                                                                                                                                                                                                        | log2(WT+/WT) |
|---------------|---------------------------|-------------------------------------------------------------------------------------------------------------------------------------------------------------------------------------------------------------------------------------------------------------------|--------------|
| 247949_at     | <a href="#">AT5G57220</a> | cytochrome P450, putative similar to Cytochrome P450 (SP:O65790) [Arabidopsis thaliana]; Cytochrome P450 (GI:7415996) [Lotus japonicus]                                                                                                                           | 5.321        |
| 261892_at     | <a href="#">AT1G80840</a> | WRKY family transcription factor similar to WRKY transcription factor GB:BAA87058 GI:6472585 from [Nicotiana tabacum]                                                                                                                                             | 5.31         |
| 262518_at     | <a href="#">AT1G17170</a> | glutathione S-transferase, putative One of three repeated putative glutathione transferases. 72% identical to glutathione transferase [AT1G76690, 12-oxophytodieneoate reductase (OPR2) identical to 12 oxophytodieneoate reductase OPR2 GB:AA878441 [Arabidopsis | 5.219        |
| 259875_s_at   | <a href="#">AT1G76690</a> | [AT1G21120, O-methyltransferase, putative similar to GI:2781394];[AT1G21110, O-methyltransferase, putative similar to                                                                                                                                             | 5.01         |
| 261450_s_at   | <a href="#">AT1G21120</a> | UDP-glucuronosyl/UDP-glucosyl transferase family protein contains Pfan profile: PF00201 UDP-glucuronosyl and UDP-glucosyl transferase                                                                                                                             | 4.99         |
| 265499_at     | <a href="#">AT2G15480</a> | 17.6 kDa class II heat shock protein (HSP17.6-CII) identical to 17.6 kDa class II heat shock protein SP:P29830 from [Arabidopsis thaliana]                                                                                                                        | 4.975        |
| 250296_at     | <a href="#">AT5G12020</a> | 17.6 kDa class I heat shock protein (HSP17.6A-CI) similar to 17.5 kDa class I heat shock protein SP:P04793 from [Glycine max]                                                                                                                                     | 4.89         |
| 262911_s_at   | <a href="#">AT1G59860</a> | DRE-binding protein (DREB2A) identical to DREB2A GI:3738230 from [Arabidopsis thaliana]; supported by                                                                                                                                                             | 4.729        |
| 250781_at     | <a href="#">AT5G05410</a> | zinc finger (C2H2 type) family protein (ZAT10) / salt-tolerance zinc finger protein (STZ) identical to salt-tolerance zinc finger protein GB:CAA64820                                                                                                             | 4.586        |
| 261648_at     | <a href="#">AT1G27730</a> | 5'-adenylylsulfate reductase (APR3) / PAPS reductase homolog (PRH26) identical to 5'-adenylylsulfate reductase [Arabidopsis thaliana] GI:2738760;                                                                                                                 | 4.55         |
| 254343_at     | <a href="#">AT4G21990</a> | cytochrome P450, putative similar to Cytochrome P450 91A1 (SP:Q9FG65 ) [Arabidopsis thaliana]; cytochrome P450, Glycyrrhiza                                                                                                                                       | 4.546        |
| 253046_at     | <a href="#">AT4G37370</a> | 5'-adenylylsulfate reductase (APR1) / PAPS reductase homolog (PRH19) identical to 5'-adenylylsulfate reductase [Arabidopsis thaliana] GI:2738756;                                                                                                                 | 4.538        |
| 255284_at     | <a href="#">AT4G04610</a> | expressed protein                                                                                                                                                                                                                                                 | 4.508        |
| 263182_at     | <a href="#">AT1G05575</a> | tolB protein-related contains weak similarity to TolB protein precursor (Swiss-Prot:P44677) [Haemophilus influenzae]                                                                                                                                              | 4.461        |
| 255543_at     | <a href="#">AT4G01870</a> | ethylene-responsive element-binding protein, putative similar to SP O80341 Ethylene responsive element binding factor 5 (AtERF5)                                                                                                                                  | 4.405        |
| 245250_at     | <a href="#">AT4G17490</a> | auxin-responsive family protein similar to auxin-induced protein AIR1; GI:11357190 [Arabidopsis thaliana]                                                                                                                                                         | 4.376        |
| 249719_at     | <a href="#">AT5G35735</a> | ethylene-responsive transcriptional coactivator, putative similar to ethylene responsive transcriptional coactivator [Lycopersicon esculentum]                                                                                                                    | 4.364        |
| 258133_at     | <a href="#">AT3G24500</a> | heat shock protein 101 (HSP101) identical to heat shock protein 101 GI:6715468 GB:AAF26423 from [Arabidopsis thaliana]                                                                                                                                            | 4.249        |
| 260248_at     | <a href="#">AT1G74310</a> | 17.6 kDa class I small heat shock protein (HSP17.6B-CI) contains Pfan PF00011: Hsp20/alpha crystallin family; identified in Scharf, K-D., et al,                                                                                                                  | 4.241        |
| 266294_at     | <a href="#">AT2G29500</a> | heat shock protein 70, putative / HSP70, putative strong similarity to heat shock protein GI:425194 [Spinacia oleracea]                                                                                                                                           | 4.234        |
| 256245_at     | <a href="#">AT3G12580</a> | IQ domain-containing protein / BAG domain-containing protein contains Pfan profiles PF00612: IQ calmodulin-binding motif, PF02179: BAG                                                                                                                            | 4.094        |
| 266590_at     | <a href="#">AT2G46240</a> | O-methyltransferase, putative similar to GI:2781394                                                                                                                                                                                                               | 4.09         |
| 261449_at     | <a href="#">AT1G21120</a> | heat shock protein 81-1 (HSP81-1) / heat shock protein 83 (HSP83) nearly identical to SP P27323 Heat shock protein 81-1 (HSP81-1) (Heat shock                                                                                                                     | 4.089        |
| 248332_at     | <a href="#">AT5G52640</a> | 17.6 kDa class I small heat shock protein (HSP17.6C-CI) (AA 1-156) identical to (17.6 kDa class I heat shock protein (HSP 17.6) (AA 1-                                                                                                                            | 4.085        |
| 260978_at     | <a href="#">AT1G53540</a> | zinc finger (C2H2 type) family protein contains Pfan domain, PF00096: Zinc finger, C2H2 type                                                                                                                                                                      | 4.078        |
| 245711_at     | <a href="#">AT5G04340</a> | heat shock protein 70, putative / HSP70, putative similar to heat shock protein hsp70 GI:1771478 from [Pisum sativum]                                                                                                                                             | 3.957        |
| 261838_at     | <a href="#">AT1G16030</a> | FAD-binding domain-containing protein similar to SP P30986 reticuline oxidase precursor (Berberine-bridge-forming enzyme) (BBE)                                                                                                                                   | 3.948        |
| 261021_at     | <a href="#">AT1G26380</a> | GHMP kinase-related contains similarity to D-glycero-D-manno-heptose 3-phosphate kinase [Aneurinibacillus thermoaerophilus]                                                                                                                                       | 3.921        |
| 250182_at     | <a href="#">AT5G14470</a> | serine O-acetyltransferase, putative identical to GI:608677 from [Arabidopsis thaliana]                                                                                                                                                                           | 3.841        |
| 260602_at     | <a href="#">AT1G55920</a> | glutathione S-transferase, putative Second of three repeated putative glutathione transferases. 72% identical to glutathione transferase                                                                                                                          | 3.82         |
| 262517_at     | <a href="#">AT1G17180</a> | [AT3G28730, structure-specific recognition protein 1 / high mobility group protein / HMG protein nearly identical to SP Q05153 Structure-specific                                                                                                                 | 3.796        |
| 256589_at     | <a href="#">AT3G28730</a> | WRKY family transcription factor contains Pfan profile: PF03106 WRKY DNA-binding domain;                                                                                                                                                                          | 3.756        |
| 267028_at     | <a href="#">AT2G38470</a> |                                                                                                                                                                                                                                                                   | 3.724        |

|             |                           |                                                                                                                                                          |       |
|-------------|---------------------------|----------------------------------------------------------------------------------------------------------------------------------------------------------|-------|
| 248381_at   | <a href="#">AT5G51830</a> | pfkB-type carbohydrate kinase family protein contains Pfam profile PF00294 pfkB family carbohydrate kinase                                               | 3.717 |
| 254204_at   | <a href="#">AT4G24160</a> | hydrolase, alpha/beta fold family protein contains Pfam profile PF00561 hydrolase, alpha/beta fold family                                                | 3.71  |
| 250351_at   | <a href="#">AT5G12030</a> | 17.7 kDa class II heat shock protein 17.6A (HSP17.7-CII) identical to heat shock protein 17.6A GI:3256075 from [Arabidopsis thaliana]                    | 3.698 |
| 245041_at   | <a href="#">AT2G26530</a> | expressed protein                                                                                                                                        | 3.671 |
| 247351_at   | <a href="#">AT5G63790</a> | no apical meristem (NAM) family protein contains Pfam PF02365: No apical meristem (NAM) domain; contains similarity to NAC-domain protein                | 3.67  |
| 248434_at   | <a href="#">AT5G51440</a> | 23.5 kDa mitochondrial small heat shock protein (HSP23.5-M) similar to heat shock 22 kDa protein, mitochondrial precursor SP:Q96331 from                 | 3.645 |
| 263150_at   | <a href="#">AT1G54050</a> | 17.4 kDa class III heat shock protein (HSP17.4-CIII) contains Pfam profile: PF00011 Hsp20/alpha crystallin family; identified as class CIII in Scharf, K | 3.644 |
| 259479_at   | <a href="#">AT1G19020</a> | expressed protein                                                                                                                                        | 3.634 |
| 260406_at   | <a href="#">AT1G69920</a> | glutathione S-transferase, putative similar to glutathione transferase GB:CAA09188 [Alopecurus myosuroides]; supported by cDNA                           | 3.632 |
| 254331_s_at | <a href="#">AT4G22710</a> | [AT4G22710, cytochrome P450 family protein contains Pfam profile: PF00067 cytochrome p450];[AT4G22690, cytochrome P450 family protein                    | 3.609 |
| 246099_at   | <a href="#">AT5G20230</a> | plastocyanin-like domain-containing protein                                                                                                              | 3.519 |
| 252515_at   | <a href="#">AT3G46230</a> | [AT3G46230, 17.4 kDa class I heat shock protein (HSP17.4-CI) identical to 17.4 kDa class I heat shock protein SP:P19036 from [Arabidopsis                | 3.517 |
| 257206_at   | <a href="#">AT3G16530</a> | legume lectin family protein contains Pfam domain, PF00139: Legume lectins beta domain                                                                   | 3.476 |
| 246858_at   | <a href="#">AT5G25930</a> | leucine-rich repeat family protein / protein kinase family protein contains similarity to Swiss-Prot:P47735 receptor-like protein kinase 5 precursor     | 3.452 |
| 261459_at   | <a href="#">AT1G21100</a> | [AT1G21100, O-methyltransferase, putative similar to GI:2781394];[AT1G21130, O-methyltransferase, putative similar to                                    | 3.438 |
| 248657_at   | <a href="#">AT5G48570</a> | peptidyl-prolyl cis-trans isomerase, putative / FK506-binding protein, putative similar to rof1 [Arabidopsis thaliana] GI:1373396                        | 3.415 |
| 259979_at   | <a href="#">AT1G76600</a> | expressed protein                                                                                                                                        | 3.359 |
| 249494_at   | <a href="#">AT5G39050</a> | transferase family protein similar to anthocyanin 5-aromatic acyltransferase from Gentiana triflora GI:4185599, malonyl CoA:anthocyanin 5-O-             | 3.357 |
| 253268_s_at | <a href="#">AT4G34135</a> | UDP-glucuronosyl/UDP-glucosyl transferase family protein contains Pfam profile: PF00201 UDP-glucuronosyl and UDP-glucosyl transferase                    | 3.356 |
| 252265_at   | <a href="#">AT3G49620</a> | 2-oxoacid-dependent oxidase, putative (DIN11) identical to partial cds of ; oxoacid-dependent oxidase (din11) from GI:10834554 [Arabidopsis              | 3.345 |
| 263184_at   | <a href="#">AT1G05560</a> | UDP-glucose transferase (UGT75B2) similar to UDP-glucose:indole-3-acetate beta-D-glucosyltransferase GI:2149127 from (Arabidopsis                        | 3.345 |
| 263231_at   | <a href="#">AT1G05680</a> | UDP-glucuronosyl/UDP-glucosyl transferase family protein contains Pfam profile: PF00201 UDP-glucuronosyl and UDP-glucosyl transferase                    | 3.33  |
| 262381_at   | <a href="#">AT1G72900</a> | disease resistance protein (TIR-NBS class), putative domain signature TIF NBS exists, suggestive of a disease resistance protein.                        | 3.235 |
| 259037_at   | <a href="#">AT3G09350</a> | armadillo/beta-catenin repeat family protein contains Pfam profile PF00514 armadillo/beta-catenin-like repeat                                            | 3.216 |
| 263931_at   | <a href="#">AT2G36220</a> | expressed protein                                                                                                                                        | 3.214 |
| 248134_at   | <a href="#">AT5G54860</a> | integral membrane transporter family protein contains 10 transmembrane domains; contains Pfam PF03092: BT1 family; contains TIGRFAMS                     | 3.196 |
| 266800_at   | <a href="#">AT2G22880</a> | [AT2G22880, VQ motif-containing protein contains PF05678: VQ motif];[AT2G22870, expressed protein]                                                       | 3.172 |
| 245252_at   | <a href="#">AT4G17500</a> | ethylene-responsive element-binding protein 1 (ERF1) / EREBP-2 protein identical to SP O80337 Ethylene responsive element binding factor 1               | 3.169 |
| 246584_at   | <a href="#">AT5G14730</a> | expressed protein                                                                                                                                        | 3.159 |
| 263379_at   | <a href="#">AT2G40140</a> | zinc finger (CCCH-type) family protein contains Pfam domain, PF00642: Zinc finger C-x8-C-x5-C-x3-H type (and similar) and Pfam domain,                   | 3.081 |
| 245038_at   | <a href="#">AT2G26560</a> | patatin, putative similar to patatin-like latex allergen [Hevea brasiliensis][PMID:10589016]; contains patatin domain PF01734                            | 3.057 |
| 256576_at   | <a href="#">AT3G28210</a> | zinc finger (AN1-like) family protein contains Pfam profile: PF01428 AN1 like zinc finger                                                                | 3     |
| 265075_at   | <a href="#">AT1G55450</a> | embryo-abundant protein-related similar to embryo-abundant protein GI:1350531 from [Picea glauca]                                                        | 2.992 |
| 254256_at   | <a href="#">AT4G23180</a> | receptor-like protein kinase 4, putative (RLK4) nearly identical to receptor-like protein kinase 4 [Arabidopsis thaliana] GI:13506745; contains Pfam     | 2.957 |
| 251745_at   | <a href="#">AT3G55980</a> | zinc finger (CCCH-type) family protein contains Pfam domain, PF00642: Zinc finger C-x8-C-x5-C-x3-H type (and similar) and Pfam domain,                   | 2.955 |

|             |                           |                                                                                                                                                                                                                           |       |
|-------------|---------------------------|---------------------------------------------------------------------------------------------------------------------------------------------------------------------------------------------------------------------------|-------|
| 263475_at   | <a href="#">AT2G31945</a> | expressed protein                                                                                                                                                                                                         | 2.951 |
| 266296_at   | <a href="#">AT2G29420</a> | glutathione S-transferase, putative                                                                                                                                                                                       | 2.945 |
| 254926_at   | <a href="#">AT4G11280</a> | 1-aminocyclopropane-1-carboxylate synthase 6 / ACC synthase 6 (ACS6)<br>identical to Gl:3746125                                                                                                                           | 2.923 |
| 262119_s_at | <a href="#">AT1G02920</a> | [AT1G02920, glutathione S-transferase, putative similar to glutathione S<br>transferase Gl:860955 from [Hyoscyamus muticus]; supported by cDNA                                                                            | 2.922 |
| 263866_at   | <a href="#">AT2G36950</a> | heavy-metal-associated domain-containing protein nearly identical to<br>farnesylated protein ATPF2 [Gl:4097545] Pfam profile PF00403: Heavy-<br>UDP-glucuronosyl/UDP-glucosyl transferase family protein contains Pfam    | 2.916 |
| 265501_at   | <a href="#">AT2G15490</a> | profile: PF00201 UDP-glucuronosyl and UDP-glucosyl transferase                                                                                                                                                            | 2.91  |
| 244940_at   | <a href="#">ATCG00900</a> | [ATCG00900, rps7.1 ribosomal protein S12];[ATCG00905, rps12c<br>rps12.3];[ATCG01230, rps12b rps12.2];[ATCG00065, rps12a rps12.1]                                                                                          | 2.906 |
| 254432_at   | <a href="#">AT4G20830</a> | FAD-binding domain-containing protein similar to SP P30986 reticuline<br>oxidase precursor (Berberine-bridge-forming enzyme) (BBE)                                                                                        | 2.895 |
| 244992_s_at | <a href="#">ATCG01240</a> | rps7.2 ribosomal protein S7                                                                                                                                                                                               | 2.873 |
| 249575_at   | <a href="#">AT5G37670</a> | 15.7 kDa class I-related small heat shock protein-like (HSP15.7-CI)<br>contains Pfam profile: PF00011 Hsp20/alpha crystallin family; identified in<br>expressed protein contains Pfam profile: PF04601 protein of unknown | 2.85  |
| 260411_at   | <a href="#">AT1G69890</a> | function (DUF569                                                                                                                                                                                                          | 2.844 |
| 247573_at   | <a href="#">AT5G61160</a> | transferase family protein similar to anthocyanin 5-aromatic acyltransferase<br>from Gentiana triflora Gl:4185599, malonyl CoA:anthocyanin 5-O-                                                                           | 2.829 |
| 244962_at   | <a href="#">ATCG01050</a> | ndhD NADH dehydrogenase ND4                                                                                                                                                                                               | 2.828 |
| 264758_at   | <a href="#">AT1G61340</a> | F-box family protein contains Pfam PF00646: F-box domain; similar to late<br>embryogenesis abundant protein Gl:1350540 from [Picea glauca]                                                                                | 2.822 |
| 254120_at   | <a href="#">AT4G24570</a> | mitochondrial substrate carrier family protein contains Pfam profile<br>PF00153 mitochondrial carrier protein                                                                                                             | 2.802 |
| 259445_at   | <a href="#">AT1G02400</a> | gibberellin 2-oxidase, putative / GA2-oxidase, putative similar to GA2ox:<br>[Gl:4678368]; similar to dioxygenase Gl:1666096 from [Marah                                                                                  | 2.798 |
| 265200_s_at | <a href="#">AT2G36790</a> | UDP-glucuronosyl/UDP-glucosyl transferase family protein contains Pfam<br>profile: PF00201 UDP-glucuronosyl and UDP-glucosyl transferase                                                                                  | 2.796 |
| 244965_at   | <a href="#">ATCG00590</a> | orf31 hypothetical protein                                                                                                                                                                                                | 2.792 |
| 267083_at   | <a href="#">AT2G41100</a> | touch-responsive protein / calmodulin-related protein 3, touch-inducible<br>(TCH3) identical to calmodulin-related protein 3, touch-induced                                                                               | 2.791 |
| 259705_at   | <a href="#">AT1G77450</a> | no apical meristem (NAM) family protein contains Pfam PF02365: No<br>apical meristem (NAM) domain; similar to GRAB1 protein GB:CAA09371,                                                                                  | 2.783 |
| 250449_at   | <a href="#">AT5G10830</a> | embryo-abundant protein-related similar to embryo-abundant protein<br>[Picea glauca] Gl:1350531                                                                                                                           | 2.77  |
| 245007_at   | <a href="#">ATCG00350</a> | psaA PSI P700 apoprotein A1                                                                                                                                                                                               | 2.737 |
| 247047_at   | <a href="#">AT5G66650</a> | expressed protein contains Pfam domain, PF04678: Protein of unknown<br>function, DUF607                                                                                                                                   | 2.729 |
| 257536_at   | <a href="#">AT3G02800</a> | tyrosine specific protein phosphatase family protein contains tyrosine<br>specific protein phosphatases active site, PROSITE:PS00383                                                                                      | 2.716 |
| 245731_at   | <a href="#">AT1G73500</a> | mitogen-activated protein kinase kinase (MAPKK), putative (MKK9)<br>mitogen-activated protein kinase kinase (MAPKK) family, PMID:12119167                                                                                 | 2.708 |
| 250670_at   | <a href="#">AT5G06860</a> | polygalacturonase inhibiting protein 1 (PGIP1) identical to<br>polygalacturonase inhibiting protein 1 (PGIP1) [Arabidopsis thaliana]                                                                                      | 2.708 |
| 263800_at   | <a href="#">AT2G24600</a> | ankyrin repeat family protein contains ankyrin repeats, Pfam:PF00023<br>syntaxin 121 (SYP121) / syntaxin-related protein (SYR1) contains Pfam                                                                             | 2.69  |
| 258786_at   | <a href="#">AT3G11820</a> | profiles: PF00804 syntaxin and PF05739: SNARE domain; identical to<br>hypoxia-responsive family protein contains Pfam profile: PF04588 hypoxia-<br>induced protein conserved region                                       | 2.689 |
| 246744_at   | <a href="#">AT5G27760</a> | expressed protein similar to unknown protein Gl:6714347 from                                                                                                                                                              | 2.685 |
| 255733_at   | <a href="#">AT1G25400</a> | [Arabidopsis thaliana]                                                                                                                                                                                                    | 2.659 |
| 264746_at   | <a href="#">AT1G62300</a> | WRKY family transcription factor similar to putative DNA-binding protein<br>Gl:7268215 from [Arabidopsis thaliana]                                                                                                        | 2.658 |
| 253643_at   | <a href="#">AT4G29780</a> | expressed protein                                                                                                                                                                                                         | 2.643 |
| 261564_at   | <a href="#">AT1G01720</a> | no apical meristem (NAM) family protein contains Pfam PF02365: No<br>apical meristem (NAM) domain; similar to NAC domain protein NAM                                                                                      | 2.626 |
| 245254_at   | <a href="#">AT4G14680</a> | sulfate adenylyltransferase 3 / ATP-sulfurylase 3 (APS3) identical to ATF<br>sulfurylase (APS3) [Arabidopsis thaliana] Gl:1575327                                                                                         | 2.59  |
| 248448_at   | <a href="#">AT5G51190</a> | AP2 domain-containing transcription factor, putative contains similarity to<br>ethylene responsive element binding factor                                                                                                 | 2.569 |

|             |                           |                                                                                                                                                                                                                 |       |
|-------------|---------------------------|-----------------------------------------------------------------------------------------------------------------------------------------------------------------------------------------------------------------|-------|
| 250054_at   | <a href="#">AT5G17860</a> | cation exchanger, putative (CAX7) contains similarity to SWISS-PROT:Q9HC58 NKX3_HUMAN Sodium/potassium/calcium exchanger 3                                                                                      | 2.567 |
| 245765_at   | <a href="#">AT1G33600</a> | leucine-rich repeat family protein contains leucine rich-repeat (LRR domains Pfam:PF00560, INTERPRO:IPR001611; contains similarity to sodium-inducible calcium-binding protein (ACP1) / sodium-responsive       | 2.544 |
| 248607_at   | <a href="#">AT5G49480</a> | calcium-binding protein (ACP1) identical to NaCl-inducible Ca <sup>2+</sup> -binding phytochelatin synthase 1 (PCS1) identical to phytochelatin synthase                                                        | 2.543 |
| 249078_at   | <a href="#">AT5G44070</a> | [ <i>Arabidopsis thaliana</i> ] gij18254401 gb AAL66747; identical to cDNA calmodulin-binding family protein contains Pfam profile PF00612: IQ                                                                  | 2.538 |
| 253414_at   | <a href="#">AT4G33050</a> | calmodulin-binding motif                                                                                                                                                                                        | 2.537 |
| 263935_at   | <a href="#">AT2G35930</a> | U-box domain-containing protein similar to immediate-early fungal elicitor protein CMPG1 [ <i>Petroselinum crispum</i> ] GI:14582200; contains Pfam                                                             | 2.534 |
| 246463_at   | <a href="#">AT5G16970</a> | NADP-dependent oxidoreductase, putative (P1) identical to probable NADP-dependent oxidoreductase P1, zeta-crystallin homolog                                                                                    | 2.523 |
| 245003_at   | <a href="#">ATCG00280</a> | psbC PSII 43 kDa protein                                                                                                                                                                                        | 2.515 |
| 258507_at   | <a href="#">AT3G06500</a> | beta-fructofuranosidase, putative / invertase, putative / saccharase putative / beta-fructosidase, putative similar to neutral invertase [ <i>Daucus</i>                                                        | 2.504 |
| 247543_at   | <a href="#">AT5G61600</a> | ethylene-responsive element-binding family protein contains similarity to ethylene responsive element binding factor 5 (AtERF5) (Swiss-Fe-S metabolism associated domain-containing protein contains Pfam       | 2.503 |
| 245193_at   | <a href="#">AT1G67810</a> | PF02657: Fe-S metabolism associated domain                                                                                                                                                                      | 2.501 |
| 262571_at   | <a href="#">AT1G15430</a> | expressed protein                                                                                                                                                                                               | 2.496 |
| 251774_at   | <a href="#">AT3G55830</a> | [AT3G55830, glycosyltransferase family protein 47 similar to exostosin related protein 2, Homo sapiens, PIR:JC5935 [SP Q93063], EXTL2, Mus                                                                      | 2.492 |
| 254784_at   | <a href="#">AT4G12720</a> | MutT/nudix family protein similar to SP P53370 Nucleoside diphosphate linked moiety X motif 6 {Homo sapiens}; contains Pfam profile PF00293: embryo-abundant protein-related similar to embryo-abundant protein | 2.491 |
| 254318_at   | <a href="#">AT4G22530</a> | [ <i>Picea glauca</i> ] GI:1350531                                                                                                                                                                              | 2.48  |
| 249983_at   | <a href="#">AT5G18470</a> | curculin-like (mannose-binding) lectin family protein contains Pfam profile: PF01453 lectin (probable mannose binding)                                                                                          | 2.47  |
| 253628_at   | <a href="#">AT4G30280</a> | [AT4G30280, xyloglucan:xyloglucosyl transferase, putative / xyloglucan endotransglycosylase, putative / endo-xyloglucan transferase, putative                                                                   | 2.469 |
| 265221_s_at | <a href="#">AT2G02010</a> | [AT2G02010, glutamate decarboxylase, putative strong similarity to glutamate decarboxylase isozyme 3 [ <i>Nicotiana tabacum</i> ]                                                                               | 2.463 |
| 267357_at   | <a href="#">AT2G40000</a> | expressed protein                                                                                                                                                                                               | 2.461 |
| 261023_at   | <a href="#">AT1G12200</a> | flavin-containing monooxygenase family protein / FMO family protein low similarity to FMO2 from Homo sapiens [SP Q99518]; contains Pfam                                                                         | 2.456 |
| 245025_at   | <a href="#">ATCG00130</a> | atpF ATPase I subunit                                                                                                                                                                                           | 2.442 |
| 262374_s_at | <a href="#">AT1G72910</a> | [AT1G72910, disease resistance protein (TIR-NBS class), putative domain signature TIR-NBS exists, suggestive of a disease resistance                                                                            | 2.436 |
| 254605_at   | <a href="#">AT4G18950</a> | ankyrin protein kinase, putative similar to ankyrin-kinase [ <i>Medicago truncatula</i> ] gij18700701 gb AAL78674                                                                                               | 2.432 |
| 246631_at   | <a href="#">AT1G50740</a> | expressed protein contains Pfam profile PF03647: Uncharacterised protein family (UPF0136)                                                                                                                       | 2.419 |
| 244973_at   | <a href="#">ATCG00690</a> | psbT PSII T protein                                                                                                                                                                                             | 2.418 |
| 260405_at   | <a href="#">AT1G69930</a> | glutathione S-transferase, putative similar to glutathione transferase GB:CAA09188 [ <i>Alopecurus myosuroides</i> ]                                                                                            | 2.416 |
| 262656_at   | <a href="#">AT1G14200</a> | zinc finger (C3HC4-type RING finger) family protein contains Pfam profile PF00097 zinc finger, C3HC4 type (RING finger)                                                                                         | 2.399 |
| 253284_at   | <a href="#">AT4G34150</a> | C2 domain-containing protein similar to calcium-dependent protein kinase [ <i>Dunaliella tertiolecta</i> ] GI:6644464; contains Pfam profile PF00168: C2                                                        | 2.398 |
| 263374_at   | <a href="#">AT2G20560</a> | DNAJ heat shock family protein SP Q9UDY4 DnaJ homolog subfamily B member 4 (Heat shock 40 kDa protein 1 homolog) {Homo sapiens};                                                                                | 2.38  |
| 247693_at   | <a href="#">AT5G59730</a> | exocyst subunit EXO70 family protein leucine zipper-containing protein <i>Lycopersicon esculentum</i> , PIR:S21495 contains Pfam domain PF03081: hydroxyproline-rich glycoprotein family protein common family  | 2.374 |
| 258282_at   | <a href="#">AT3G26910</a> | member:At2g33490 [ <i>Arabidopsis thaliana</i> ]                                                                                                                                                                | 2.37  |
| 253827_at   | <a href="#">AT4G28085</a> | expressed protein                                                                                                                                                                                               | 2.356 |
| 248164_at   | <a href="#">AT5G54490</a> | calcium-binding EF-hand protein, putative similar to EF-hand Ca <sup>2+</sup> -binding protein CCD1 [ <i>Triticum aestivum</i> ] GI:9255753; contains                                                           | 2.33  |
| 248799_at   | <a href="#">AT5G47230</a> | ethylene-responsive element-binding factor 5 (ERF5) identical to SP O80341 Ethylene responsive element binding factor 5 (AtERF5)                                                                                | 2.327 |
| 252671_at   | <a href="#">AT3G44190</a> | pyridine nucleotide-disulphide oxidoreductase family protein low similarity to dihydrolipoamide dehydrogenase from <i>Clostridium magnum</i>                                                                    | 2.316 |

|             |                           |                                                                                                                                                    |       |
|-------------|---------------------------|----------------------------------------------------------------------------------------------------------------------------------------------------|-------|
| 247655_at   | <a href="#">AT5G59820</a> | zinc finger (C2H2 type) family protein (ZAT12) identical to zinc finger protein ZAT12 [Arabidopsis thaliana] gi 1418325 emb CAA67232               | 2.313 |
| 252976_s_at | <a href="#">AT4G38550</a> | expressed protein                                                                                                                                  | 2.305 |
| 254211_at   | <a href="#">AT4G23570</a> | phosphatase-related low similarity to phosphoprotein phosphatase [Mus musculus] GI:567040; contains Pfam profiles PF00515: TPR Domain,             | 2.299 |
| 256017_at   | <a href="#">AT1G19180</a> | expressed protein                                                                                                                                  | 2.297 |
| 245662_at   | <a href="#">AT1G28190</a> | expressed protein                                                                                                                                  | 2.278 |
| 252592_at   | <a href="#">AT3G45640</a> | mitogen-activated protein kinase, putative / MAPK, putative (MPK3) identical to mitogen-activated protein kinase homolog                           | 2.276 |
| 262935_at   | <a href="#">AT1G79410</a> | transporter-related low similarity to organic anion transporter 3 [Rattus norvegicus] GI:5545293; contains Pfam profile PF00083: major facilitator | 2.268 |
| 245369_at   | <a href="#">AT4G15975</a> | zinc finger (C3HC4-type RING finger) family protein contains Pfam domain, PF00097: Zinc finger, C3HC4 type (RING finger)                           | 2.263 |
| 253915_at   | <a href="#">AT4G27280</a> | calcium-binding EF hand family protein similar to EF-hand Ca <sup>2+</sup> -binding protein CCD1 [Triticum aestivum] GI:9255753; contains          | 2.245 |
| 265670_s_at | <a href="#">AT2G32210</a> | expressed protein                                                                                                                                  | 2.242 |
| 246289_at   | <a href="#">AT3G56880</a> | VQ motif-containing protein contains PF05678: VQ motif                                                                                             | 2.24  |
| 245006_at   | <a href="#">ATCG00340</a> | psaB PSI P700 apoprotein A2                                                                                                                        | 2.237 |
| 246464_at   | <a href="#">AT5G16990</a> | [AT5G16990, NADP-dependent oxidoreductase, putative strong similarity to probable NADP-dependent oxidoreductase (zeta-crystallin homolog) P1       | 2.234 |
| 253664_at   | <a href="#">AT4G30210</a> | NADPH-cytochrome p450 reductase, putative / NADPH-ferrihemoprotein reductase, putative similar to NADPH-cytochrome P450 oxidoreductase             | 2.224 |
| 266737_at   | <a href="#">AT2G47140</a> | short-chain dehydrogenase/reductase (SDR) family protein similar to beta-hydroxysteroiddehydrogenase GI:15983819 from [Digitalis lanata]           | 2.219 |
| 260592_at   | <a href="#">AT1G55850</a> | cellulose synthase family protein similar to cellulose synthase catalytic subunit [gi:13925881] from Nicotiana glauca, cellulose synthase-5        | 2.208 |
| 266368_at   | <a href="#">AT2G41380</a> | embryo-abundant protein-related similar to embryo-abundant protein [Picea glauca] GI:1350531                                                       | 2.185 |
| 246293_at   | <a href="#">AT3G56710</a> | sigA-binding protein identical to SigA binding protein [Arabidopsis thaliana] gi 6980074 gb AAF34713; contains Pfam PF05678: VQ motif              | 2.184 |
| 252908_at   | <a href="#">AT4G39670</a> | expressed protein                                                                                                                                  | 2.184 |
| 260025_at   | <a href="#">AT1G30070</a> | SGS domain-containing protein similar to calcyclin binding protein [Mus musculus] GI:3142331; contains Pfam profile PF05002: SGS domain            | 2.179 |
| 266983_at   | <a href="#">AT2G39400</a> | hydrolase, alpha/beta fold family protein similar to monoglyceride lipase from [Homo sapiens] GI:14594904, [Mus musculus] GI:2632162; contains     | 2.179 |
| 256835_at   | <a href="#">AT3G22890</a> | sulfate adenylyltransferase 1 / ATP-sulfurylase 1 (APS1) nearly identical to ATP sulfurylase (APS1) [Arabidopsis thaliana] GI:6606509              | 2.176 |
| 259879_at   | <a href="#">AT1G76650</a> | calcium-binding EF hand family protein similar to regulator of gene silencing calmodulin-related protein GI:12963415 from [Nicotiana               | 2.169 |
| 264365_s_at | <a href="#">AT1G03220</a> | [AT1G03220, extracellular dermal glycoprotein, putative / EDGP, putative similar to extracellular dermal glycoprotein EDGP precursor [Daucus       | 2.168 |
| 257918_at   | <a href="#">AT3G23230</a> | ethylene-responsive factor, putative similar to EREBP-4 GB:BAA07323 from [Nicotiana tabacum]                                                       | 2.16  |
| 244975_at   | <a href="#">ATCG00710</a> | psbH PSII 10KDa phosphoprotein                                                                                                                     | 2.158 |
| 245026_at   | <a href="#">ATCG00140</a> | atpH ATPase III subunit                                                                                                                            | 2.155 |
| 249918_at   | <a href="#">AT5G19240</a> | expressed protein                                                                                                                                  | 2.154 |
| 262383_at   | <a href="#">AT1G72940</a> | disease resistance protein (TIR-NBS class), putative domain signature TIF NBS exists, suggestive of a disease resistance protein.                  | 2.152 |
| 246270_at   | <a href="#">AT4G36500</a> | expressed protein                                                                                                                                  | 2.151 |
| 257670_at   | <a href="#">AT3G20340</a> | expressed protein                                                                                                                                  | 2.142 |
| 266010_at   | <a href="#">AT2G37430</a> | zinc finger (C2H2 type) family protein (ZAT11) contains Pfam domain, PF00096: Zinc finger, C2H2 type                                               | 2.141 |
| 245024_at   | <a href="#">ATCG00120</a> | atpA ATPase alpha subunit                                                                                                                          | 2.135 |
| 246018_at   | <a href="#">AT5G10695</a> | expressed protein                                                                                                                                  | 2.119 |
| 246777_at   | <a href="#">AT5G27420</a> | zinc finger (C3HC4-type RING finger) family protein similar to RING-H2 zinc finger protein ATL6 [Arabidopsis thaliana]                             | 2.114 |

|           |                           |                                                                                                                                                                                                                                                                                                                                                                                                                      |       |
|-----------|---------------------------|----------------------------------------------------------------------------------------------------------------------------------------------------------------------------------------------------------------------------------------------------------------------------------------------------------------------------------------------------------------------------------------------------------------------|-------|
| 246034_at | <a href="#">AT5G08350</a> | GRAM domain-containing protein / ABA-responsive protein-related contains similarity to ABA-responsive protein in barley (GI:4103635) glutathione S-transferase-related contains weak hit to Pfam profile PF00043: Glutathione S-transferase, C-terminal domain                                                                                                                                                       | 2.109 |
| 254549_at | <a href="#">AT4G19880</a> | UDP-glucose:indole-3-acetate beta-D-glucosyltransferase (IAGLU identical to UDP-glucose:indole-3-acetate beta-D-glucosyltransferase                                                                                                                                                                                                                                                                                  | 2.105 |
| 245277_at | <a href="#">AT4G15550</a> | psbB PSII 47KDa protein                                                                                                                                                                                                                                                                                                                                                                                              | 2.102 |
| 244972_at | <a href="#">ATCG00680</a> | lipase class 3 family protein contains Pfam profile PF01764: Lipase                                                                                                                                                                                                                                                                                                                                                  | 2.068 |
| 260915_at | <a href="#">AT1G02660</a> | expressed protein                                                                                                                                                                                                                                                                                                                                                                                                    | 2.065 |
| 261748_at | <a href="#">AT1G76070</a> | UDP-glucuronosyl/UDP-glucosyl transferase family protein contains Pfam profile: PF00201 UDP-glucuronosyl and UDP-glucosyl transferase                                                                                                                                                                                                                                                                                | 2.061 |
| 255622_at | <a href="#">AT4G01070</a> | heat shock protein 70 family protein / HSP70 family protein similar to SP P22953 Heat shock cognate 70 kDa protein 1 (Hsc70.1) {Arabidopsis short-chain dehydrogenase/reductase (SDR) family protein similar to short chain type dehydrogenase/reductase SP:Q08632 [Picea abies]                                                                                                                                     | 2.061 |
| 265675_at | <a href="#">AT2G32120</a> | EXS family protein / ERD1/XPR1/SYG1 family protein similar to PHO1 protein [Arabidopsis thaliana] GI:20069032; contains Pfam profiles [AT3G18690, VQ motif-containing protein contains PF05678: VQ motif];[AT3G18680, aspartate/glutamate/uridylyl kinase family protein                                                                                                                                             | 2.052 |
| 254759_at | <a href="#">AT4G13180</a> | glycine hydroxymethyltransferase, putative / serine hydroxymethyltransferase, putative / serine/threonine aldolase, putative WRKY family transcription factor contains Pfam profile: PF03106 WRKY                                                                                                                                                                                                                    | 2.046 |
| 262649_at | <a href="#">AT1G14040</a> | DNA -binding domain                                                                                                                                                                                                                                                                                                                                                                                                  | 2.043 |
| 257751_at | <a href="#">AT3G18690</a> | disease resistance protein (TIR class), putative domain signature TIF exists, suggestive of a disease resistance protein.                                                                                                                                                                                                                                                                                            | 2.043 |
| 260126_at | <a href="#">AT1G36370</a> | ethylene-responsive element-binding factor 2 (ERF2) identical to SP O80338 Ethylene responsive element binding factor 2 (ATERF2)                                                                                                                                                                                                                                                                                     | 2.028 |
| 253535_at | <a href="#">AT4G31550</a> |                                                                                                                                                                                                                                                                                                                                                                                                                      | 2.015 |
| 264153_at | <a href="#">AT1G65390</a> | expressed protein                                                                                                                                                                                                                                                                                                                                                                                                    | 2.014 |
| 248794_at | <a href="#">AT5G47220</a> | transferase family protein similar to anthranilate N hydroxycinnamoyl/benzoyltransferase, Dianthus caryophyllus [gi:2239091]; embryo-abundant protein-related similar to embryo-abundant protein [Picea glauca] GI:1350531                                                                                                                                                                                           | 2.013 |
| 264314_at | <a href="#">AT1G70420</a> |                                                                                                                                                                                                                                                                                                                                                                                                                      | 2.012 |
| 250550_at | <a href="#">AT5G07870</a> | ycf5 hypothetical protein                                                                                                                                                                                                                                                                                                                                                                                            | 2.01  |
| 251884_at | <a href="#">AT3G54150</a> | peroxidase, putative identical to peroxidase ATP24a [Arabidopsis thaliana] gi 1890313 emb CAA72484                                                                                                                                                                                                                                                                                                                   | 2.005 |
| 244961_at | <a href="#">ATCG01040</a> | no apical meristem (NAM) family protein contains Pfam PF02365: No apical meristem (NAM) domain; similar to NAC2 - Arabidopsis thaliana, respiratory burst oxidase protein D (RbohD) / NADPH oxidase identical to respiratory burst oxidase protein D from Arabidopsis thaliana [gi:3242789]                                                                                                                          | 2.004 |
| 249459_at | <a href="#">AT5G39580</a> | calcium-transporting ATPase, plasma membrane-type, putative / Ca(2+) ATPase, putative (ACA12) identical to SP Q9LY77 Potential calcium-glycosyl hydrolase family 81 protein similar to beta-glucan-elicitor receptor GI:1752734 from [Glycine max]                                                                                                                                                                   | 2     |
| 252278_at | <a href="#">AT3G49530</a> | zinc finger (C3HC4-type RING finger) family protein contains Pfam domain, PF00097: Zinc finger, C3HC4 type (RING finger)                                                                                                                                                                                                                                                                                             | 1.998 |
| 248719_at | <a href="#">AT5G47910</a> | dehydroascorbate reductase, putative similar to GI:6939839 from [Oryza sativa]                                                                                                                                                                                                                                                                                                                                       | 1.996 |
| 251176_at | <a href="#">AT3G63380</a> | 5'-adenylylsulfate reductase 2, chloroplast (APR2) (APSR) / adenosine 5-phosphosulfate 5'-adenylylsulfate (APS) sulfotransferase 2 / 3'-disease resistance protein (TIR class), putative domain signature TIF exists, suggestive of a disease resistance protein.                                                                                                                                                    | 1.984 |
| 246532_at | <a href="#">AT5G15870</a> |                                                                                                                                                                                                                                                                                                                                                                                                                      | 1.983 |
| 246532_at | <a href="#">AT5G15870</a> |                                                                                                                                                                                                                                                                                                                                                                                                                      | 1.982 |
| 252474_at | <a href="#">AT3G46620</a> | myb family transcription factor (MYB51) contains PFAM profile: PF00249 defense-related protein, putative strong similarity to defense-related protein [Brassica carinata] GI:14009290; contains Pfam profile PF00117: expressed protein contains Pfam profile: PF03959 domain of unknown function (DUF341)                                                                                                           | 1.974 |
| 256453_at | <a href="#">AT1G75270</a> | stress-responsive protein, putative similar to ethylene-inducible protein HEVER [Hevea brasiliensis] SWISS-PROT:Q39963; contains Pfam armadillo/beta-catenin repeat family protein / U-box domain-containing protein contains Pfam domain, PF00514: Armadillo/beta-catenin-like calcium-binding protein, putative similar to SP Q09011 Calcium-binding protein CAST {Solanum tuberosum}; contains INTERPRO:IPR002048 | 1.974 |
| 264745_at | <a href="#">AT1G62180</a> |                                                                                                                                                                                                                                                                                                                                                                                                                      | 1.958 |
| 264213_at | <a href="#">AT1G65390</a> |                                                                                                                                                                                                                                                                                                                                                                                                                      | 1.95  |
| 255753_at | <a href="#">AT1G18570</a> |                                                                                                                                                                                                                                                                                                                                                                                                                      | 1.95  |
| 253606_at | <a href="#">AT4G30530</a> |                                                                                                                                                                                                                                                                                                                                                                                                                      | 1.945 |
| 254158_at | <a href="#">AT4G24380</a> |                                                                                                                                                                                                                                                                                                                                                                                                                      | 1.94  |
| 258336_at | <a href="#">AT3G16050</a> |                                                                                                                                                                                                                                                                                                                                                                                                                      | 1.936 |
| 251061_at | <a href="#">AT5G01830</a> |                                                                                                                                                                                                                                                                                                                                                                                                                      | 1.923 |
| 254487_at | <a href="#">AT4G20780</a> |                                                                                                                                                                                                                                                                                                                                                                                                                      |       |
| 266259_at | <a href="#">AT2G27830</a> | expressed protein                                                                                                                                                                                                                                                                                                                                                                                                    |       |

|                         |                           |                                                                                                                                                         |       |
|-------------------------|---------------------------|---------------------------------------------------------------------------------------------------------------------------------------------------------|-------|
| 245009_at               | <a href="#">ATCG00380</a> | rps4 ribosomal protein S4                                                                                                                               | 1.918 |
| 262325_at               | <a href="#">AT1G64160</a> | disease resistance-responsive family protein / dirigent family protein similar to dirigent protein GB:AAF25365 GI:6694709 from [Thuja plicata]; similar | 1.918 |
| 244976_at               | <a href="#">ATCG00720</a> | petB cytochrome B6                                                                                                                                      | 1.917 |
| 247708_at               | <a href="#">AT5G59550</a> | zinc finger (C3HC4-type RING finger) family protein contains Pfam domain, PF00097: Zinc finger, C3HC4 type (RING finger)                                | 1.916 |
| 253485_at               | <a href="#">AT4G31800</a> | WRKY family transcription factor                                                                                                                        | 1.906 |
| 254592_at               | <a href="#">AT4G18880</a> | heat shock transcription factor 21 (HSF21) identical to heat shock transcription factor 21 [Arabidopsis thaliana] GI:3399765; contains Pfam             | 1.904 |
| 262072_at               | <a href="#">AT1G59590</a> | expressed protein                                                                                                                                       | 1.901 |
| 258436_at               | <a href="#">AT3G16720</a> | zinc finger (C3HC4-type RING finger) family protein contains Pfam domain, PF00097: Zinc finger, C3HC4 type (RING finger)                                | 1.894 |
| 260401_at               | <a href="#">AT1G69840</a> | band 7 family protein strong similarity to hypersensitive-induced response protein [Zea mays] GI:7716466; contains Pfam profile PF01145: SPFH           | 1.889 |
| 246612_at               | <a href="#">AT5G35320</a> | expressed protein                                                                                                                                       | 1.885 |
| 251400_at               | <a href="#">AT3G60420</a> | expressed protein                                                                                                                                       | 1.878 |
| 248686_at               | <a href="#">AT5G48540</a> | 33 kDa secretory protein-related contains Pfam PF01657: Domain of unknown function, duplicated in 33 KDa secretory proteins                             | 1.868 |
| 261934_at               | <a href="#">AT1G22400</a> | UDP-glucuronosyl/UDP-glucosyl transferase family protein contains Pfam profile: PF00201 UDP-glucuronosyl and UDP-glucosyl transferase                   | 1.868 |
| 267300_at               | <a href="#">AT2G30140</a> | UDP-glucuronosyl/UDP-glucosyl transferase family protein contains Pfam profile: PF00201 UDP-glucuronosyl and UDP-glucosyl transferase                   | 1.864 |
| 264202_at               | <a href="#">AT1G22810</a> | AP2 domain-containing transcription factor, putative Contains similarity to transcription factor (TINY) isolog T02O04.22 gb 2062174 from A. thaliana    | 1.863 |
| 244971_at               | <a href="#">ATCG00670</a> | clpP ATP-dependent protease subunit                                                                                                                     | 1.861 |
| 247137_at               | <a href="#">AT5G66210</a> | calcium-dependent protein kinase family protein / CDPK family protein contains Pfam domains, PF00069: Protein kinase domain and PF00036:                | 1.858 |
| 247488_at               | <a href="#">AT5G61820</a> | expressed protein MtN19, Medicago truncatula, EMBL:MTY15367                                                                                             | 1.856 |
| 249942_at               | <a href="#">AT5G22300</a> | nitrilase 4 (NIT4) identical to SP P46011 Nitrilase 4 (EC 3.5.5.1) {Arabidopsis thaliana}                                                               | 1.855 |
| 260243_at               | <a href="#">AT1G63720</a> | expressed protein similar to putative protein GB:CAA18164 [Arabidopsis thaliana]                                                                        | 1.847 |
| 245528_at               | <a href="#">AT4G15530</a> | pyruvate phosphate dikinase family protein contains Pfam profiles PF01326 pyruvate phosphate dikinase, PEP/pyruvate binding domain,                     | 1.834 |
| 256337_at               | <a href="#">AT1G72060</a> | expressed protein                                                                                                                                       | 1.831 |
| 251937_at               | <a href="#">AT3G53400</a> | expressed protein                                                                                                                                       | 1.819 |
| 248981_at               | <a href="#">AT5G45110</a> | ankyrin repeat family protein / BTB/POZ domain-containing protein contains Pfam domain, PF00023: Ankyrin repeat and Pfam domain,                        | 1.817 |
| 258207_at               | <a href="#">AT3G14050</a> | RelA/SpoT protein, putative (RSH2) nearly identical to RelA/SpoT homolog RSH2 [Arabidopsis thaliana] GI:7141306; contains Pfam profiles PF01966         | 1.816 |
| 266658_at               | <a href="#">AT2G25735</a> | expressed protein                                                                                                                                       | 1.815 |
| 245866_s_at             | <a href="#">AT1G57990</a> | [AT1G57990, purine permease-related low similarity to purine permease [Arabidopsis thaliana] GI:7620007; contains Pfam profile PF03151:                 | 1.814 |
| 261718_at               | <a href="#">AT1G18390</a> | protein kinase family protein contains protein kinase domain Pfam:PF00069                                                                               | 1.807 |
| 265841_at               | <a href="#">AT2G35710</a> | glycogenin glucosyltransferase (glycogenin)-related low similarity to glycogenin-2 from Homo sapiens [SP O15488]                                        | 1.806 |
| 259272_at               | <a href="#">AT3G01290</a> | band 7 family protein similar to hypersensitive-induced response protein [Zea mays] GI:7716470; contains Pfam profile PF01145: SPFH domain /            | 1.8   |
| 247279_at               | <a href="#">AT5G64310</a> | arabinogalactan-protein (AGP1) identical to gi:3883120 gb:AAC77823                                                                                      | 1.791 |
| 255502_at               | <a href="#">AT4G02410</a> | lectin protein kinase family protein contains Pfam domains, PF00069: Protein kinase domain, PF00139: Legume lectins beta domain and                     | 1.79  |
| AFFX-Athal-25SrRNA_s_at |                           |                                                                                                                                                         | 1.789 |
| 246870_at               | <a href="#">AT5G26030</a> | ferrochelatase I identical to Swiss-Prot:P42043 ferrochelatase I chloroplast/mitochondrial precursor (EC 4.99.1.1) (Protoheme ferro-lyase)              | 1.788 |
| 264299_s_at             | <a href="#">AT1G78860</a> | curculin-like (mannose-binding) lectin family protein low similarity to Ser/Thr protein kinase [Zea mays] GI:2598067; contains Pfam profile             | 1.786 |



|             |                           |                                                                                                                                                                                                                                                                                        |       |
|-------------|---------------------------|----------------------------------------------------------------------------------------------------------------------------------------------------------------------------------------------------------------------------------------------------------------------------------------|-------|
| 251636_at   | <a href="#">AT3G57530</a> | calcium-dependent protein kinase, putative / CDPK, putative similar to calmodulin-domain protein kinase CDPK isoform 7 [Arabidopsis thaliana]                                                                                                                                          | 1.782 |
| 251144_at   | <a href="#">AT5G01210</a> | transferase family protein contains Pfam profile PF02458 transferase family                                                                                                                                                                                                            | 1.78  |
| 266841_at   | <a href="#">AT2G26150</a> | heat shock transcription factor family protein contains Pfam profile PF00447 HSF-type DNA-binding domain                                                                                                                                                                               | 1.772 |
| 251507_at   | <a href="#">AT3G59080</a> | aspartyl protease family protein contains similarity to CND41, chloroplast nucleoid DNA binding protein (GI:2541876) [Nicotiana tabacum]; contains zinc finger (C3HC4-type RING finger) family protein (ATL6) contains Pfam profile: PF00097: Zinc finger, C3HC4 type (RING finger)    | 1.768 |
| 259312_at   | <a href="#">AT3G05200</a> | expressed protein                                                                                                                                                                                                                                                                      | 1.755 |
| 256442_at   | <a href="#">AT3G10930</a> | expressed protein                                                                                                                                                                                                                                                                      | 1.752 |
| 258792_at   | <a href="#">AT3G04640</a> | glycine-rich protein predicted proteins, Arabidopsis thaliana C2 domain-containing protein / src2-like protein, putative similar to cold regulated gene SRC2 [Glycine max] GI:2055230; contains Pfam profile                                                                           | 1.751 |
| 264655_at   | <a href="#">AT1G09070</a> | expressed protein                                                                                                                                                                                                                                                                      | 1.747 |
| 261445_at   | <a href="#">AT1G28380</a> | expressed protein                                                                                                                                                                                                                                                                      | 1.746 |
| 254200_at   | <a href="#">AT4G24110</a> | expressed protein                                                                                                                                                                                                                                                                      | 1.742 |
| 263478_at   | <a href="#">AT2G31880</a> | [AT2G31880, leucine-rich repeat transmembrane protein kinase, putative];[AT2G31890, expressed protein]                                                                                                                                                                                 | 1.74  |
| 265199_s_at | <a href="#">AT2G36770</a> | UDP-glucuronosyl/UDP-glucosyl transferase family protein contains Pfam profile: PF00201 UDP-glucuronosyl and UDP-glucosyl transferase expressed protein protein At2g40060 - Arabidopsis thaliana                                                                                       | 1.729 |
| 246305_at   | <a href="#">AT3G51890</a> | EMBL:AF002109                                                                                                                                                                                                                                                                          | 1.727 |
| 253203_at   | <a href="#">AT4G34710</a> | arginine decarboxylase 2 (SPE2) identical to SP O23141 Arginine decarboxylase 2 (EC 4.1.1.19) (ARGDC 2) (ADC 2) (ADC-N) {Arabidopsis                                                                                                                                                   | 1.726 |
| 245048_at   | <a href="#">ATCG00040</a> | matK hypothetical protein                                                                                                                                                                                                                                                              | 1.724 |
| 264624_at   | <a href="#">AT1G08930</a> | early-responsive to dehydration stress protein (ERD6) / sugar transport family protein identical to ERD6 protein {Arabidopsis thaliana} GI:3123712                                                                                                                                     | 1.724 |
| 266017_at   | <a href="#">AT2G18690</a> | expressed protein                                                                                                                                                                                                                                                                      | 1.707 |
| 261526_at   | <a href="#">AT1G14380</a> | [AT1G14380, calmodulin-binding family protein contains Pfam profile PF00612: IQ calmodulin-binding motif];[AT1G14370, protein kinase GCN5-related N-acetyltransferase (GNAT) family protein contains Pfam profile PF00583: acetyltransferase, GNAT family                              | 1.705 |
| 265725_at   | <a href="#">AT2G32030</a> | expressed protein                                                                                                                                                                                                                                                                      | 1.69  |
| 244983_at   | <a href="#">ATCG00790</a> | rpl16 ribosomal protein L16                                                                                                                                                                                                                                                            | 1.684 |
| 245051_at   | <a href="#">AT2G23320</a> | WRKY family transcription factor identical to WRKY DNA-binding protein 15 GI:13506742 from [Arabidopsis thaliana]                                                                                                                                                                      | 1.684 |
| 265184_at   | <a href="#">AT1G23710</a> | expressed protein                                                                                                                                                                                                                                                                      | 1.684 |
| 261719_at   | <a href="#">AT1G18380</a> | expressed protein                                                                                                                                                                                                                                                                      | 1.683 |
| 260974_at   | <a href="#">AT1G53430</a> | [AT1G53430, leucine-rich repeat family protein / protein kinase family protein contains Pfam domains PF00560: Leucine Rich Repeat and glutathione S-transferase 6 (GST6) identical to GB:X95295. Based on identical cDNA hits, the translation is now 40 AAs longer at the N-terminal, | 1.679 |
| 266461_at   | <a href="#">AT2G47730</a> | cytochrome P450 family protein similar to SP Q42569 C901_ARATH                                                                                                                                                                                                                         | 1.673 |
| 248964_at   | <a href="#">AT5G45340</a> | Cytochrome P450 90A1 (SP:Q42569) [Arabidopsis thaliana]; contains quinone reductase, putative similar to 1,4-benzoquinone reductase                                                                                                                                                    | 1.672 |
| 248162_at   | <a href="#">AT5G54500</a> | [Phanerochaete chrysosporium][GI:4454993]; contains flavodoxin domain                                                                                                                                                                                                                  | 1.665 |
| 254408_at   | <a href="#">AT4G21390</a> | S-locus lectin protein kinase family protein contains Pfam profiles PF00954 S-locus glycoprotein family, PF00069 protein kinase domain, [AT5G39670, calcium-binding EF hand family protein contains                                                                                    | 1.664 |
| 249417_at   | <a href="#">AT5G39670</a> | INTERPRO:IPR002048 calcium-binding EF-hand domain];[AT5G39680, DNAJ heat shock N-terminal domain-containing protein similar to J11                                                                                                                                                     | 1.663 |
| 257654_at   | <a href="#">AT3G13310</a> | protein [Arabidopsis thaliana] GI:9843641; contains Pfam profile: PF00226                                                                                                                                                                                                              | 1.66  |
| 267337_at   | <a href="#">AT2G39980</a> | transferase family protein contains Pfam profile PF02458 transferase family stress-inducible protein, putative similar to sti (stress inducible protein)                                                                                                                               | 1.657 |
| 254839_at   | <a href="#">AT4G12400</a> | [Glycine max] GI:872116; contains Pfam profile PF00515 TPR Domain auxin-responsive family protein similar to auxin-induced protein SAUR-AC                                                                                                                                             | 1.65  |
| 251342_at   | <a href="#">AT3G60690</a> | (GP:546362) (PIR:T06084)[Arabidopsis thaliana] PIR:T06084                                                                                                                                                                                                                              | 1.648 |
| 253859_at   | <a href="#">AT4G27657</a> | expressed protein                                                                                                                                                                                                                                                                      | 1.645 |
| 253332_at   | <a href="#">AT4G33420</a> | peroxidase, putative identical to class III peroxidase ATP32 [Arabidopsis thaliana] gi 17530547 gb AAL40837; identical to cDNA class III peroxidase                                                                                                                                    | 1.639 |

|             |                           |                                                                                                                                                        |       |
|-------------|---------------------------|--------------------------------------------------------------------------------------------------------------------------------------------------------|-------|
| 248327_at   | <a href="#">AT5G52750</a> | heavy-metal-associated domain-containing protein Pfam profile PF00403<br>Heavy-metal-associated domain                                                 | 1.63  |
| 245047_at   | <a href="#">ATCG00020</a> | psbA PSII 32 KDa protein                                                                                                                               | 1.629 |
| 263403_at   | <a href="#">AT2G04040</a> | MATE efflux family protein contains Pfam profile: PF01554<br>uncharacterized membrane protein family                                                   | 1.628 |
| 245002_at   | <a href="#">ATCG00270</a> | psbD PSII D2 protein                                                                                                                                   | 1.626 |
| 254042_at   | <a href="#">AT4G25810</a> | xyloglucan:xyloglucosyl transferase, putative / xyloglucan<br>endotransglycosylase, putative / endo-xyloglucan transferase, putative                   | 1.626 |
| 245768_at   | <a href="#">AT1G33590</a> | disease resistance protein-related / LRR protein-related contains leucine<br>rich-repeat domains Pfam:PF00560, INTERPRO:IPR001611; similar to          | 1.625 |
| 262505_at   | <a href="#">AT1G21680</a> | expressed protein similar to TolB protein precursor (SP:Q9ZDM5)<br>{Rickettsia prowazekii}; ESTs gb N96028, gb F14286, gb T20680,                      | 1.624 |
| 260477_at   | <a href="#">AT1G11050</a> | protein kinase family protein contains protein kinase domain<br>Pfam:PF00069                                                                           | 1.623 |
| 250826_at   | <a href="#">AT5G05220</a> | expressed protein                                                                                                                                      | 1.622 |
| 260556_at   | <a href="#">AT2G43620</a> | chitinase, putative similar to basic endochitinase CHB4 precursor<br>SP:Q06209 from [Brassica napus]                                                   | 1.621 |
| 250676_at   | <a href="#">AT5G06320</a> | harpin-induced family protein / HIN1 family protein / harpin-responsive<br>family protein / NDR1/HIN1-like protein 3 similar to harpin-induced protein | 1.62  |
| 260656_at   | <a href="#">AT1G19380</a> | expressed protein                                                                                                                                      | 1.617 |
| 261143_at   | <a href="#">AT1G19770</a> | purine permease-related low similarity to purine permease [Arabidopsis:<br>thaliana] GI:7620007; contains Pfam profile PF03151: Domain of unknown      | 1.612 |
| 267623_at   | <a href="#">AT2G39650</a> | expressed protein contains Pfam profile PF04720: Protein of unknown<br>function (DUF506)                                                               | 1.611 |
| 249835_s_at | <a href="#">AT5G23490</a> | [AT5G23490, expressed protein];[AT5G23510, expressed protein]                                                                                          | 1.61  |
| 253884_at   | <a href="#">AT4G27670</a> | 25.3 kDa small heat shock protein, chloroplast precursor (HSP25.3-P);<br>identical to small heat shock protein, chloroplast precursor SP:P31170        | 1.606 |
| 256433_at   | <a href="#">AT3G10985</a> | wound-responsive protein-related similar to SP P20144 Wound-inducec<br>protein 1 {Solanum tuberosum}                                                   | 1.603 |
| 258921_at   | <a href="#">AT3G10500</a> | no apical meristem (NAM) family protein similar to to NAC2 (GI:645671)                                                                                 | 1.595 |
| 245788_at   | <a href="#">AT1G32120</a> | [Arabidopsis thaliana]; contains Pfam PF02365: No apical meristem<br>expressed protein contains Pfam profile PF04819: Family of unknown                | 1.586 |
| 262503_at   | <a href="#">AT1G21670</a> | function (DUF716) (Plant viral-response family)<br>expressed protein similar to TolB protein precursor (SP:P50601)                                     | 1.576 |
| 256044_at   | <a href="#">AT1G07160</a> | {Pseudomonas aeruginosa}                                                                                                                               | 1.574 |
| 264663_at   | <a href="#">AT1G09970</a> | protein phosphatase 2C, putative / PP2C, putative similar to protei<br>phosphatase 2C GI:2582800 from [Medicago sativa]                                | 1.573 |
| 258395_at   | <a href="#">AT3G15500</a> | leucine-rich repeat transmembrane protein kinase, putative Similar to A<br>thaliana receptor-like protein kinase (gb RLK5_ARATH). ESTs                 | 1.565 |
| 261344_at   | <a href="#">AT1G79710</a> | no apical meristem (NAM) family protein (NAC3) identical to AtNAC3<br>[Arabidopsis thaliana] GI:12060424; contains Pfam PF02365: No apical             | 1.564 |
| 248205_at   | <a href="#">AT5G54300</a> | integral membrane transporter family protein similar to high affinity folic<br>acid/methotrexate transporter 5 (GI:21898554) [Leishmania tarentolae];  | 1.558 |
| 263823_s_at | <a href="#">AT2G40350</a> | expressed protein contains similarity to cotton fiber expressed protein<br>[Gossypium hirsutum] gi 3264828 gb AAC33276                                 | 1.558 |
| 247433_at   | <a href="#">AT5G62540</a> | AP2 domain-containing transcription factor, putative (DREB2) similar to<br>DREB2A (GP:3738230) and DREB2B (GP:3738232) [Arabidopsis                    | 1.558 |
| 261650_at   | <a href="#">AT1G27770</a> | ubiquitin-conjugating enzyme 3 (UBC3) E2; identical to gi:431261,<br>SP:P42746                                                                         | 1.556 |
| 246108_at   | <a href="#">AT5G28630</a> | calcium-transporting ATPase 1, plasma membrane-type / Ca(2+)-ATPase<br>isoform 1 (ACA1) / plastid envelope ATPase 1 (PEA1) identical to                | 1.555 |
| 265572_at   | <a href="#">AT2G28210</a> | glycine-rich protein                                                                                                                                   | 1.551 |
| 247811_at   | <a href="#">AT5G58430</a> | carbonic anhydrase family protein similar to storage protein (dioscorin<br>[Dioscorea cayenensis] GI:433463; contains Pfam profile PF00194:            | 1.547 |
| 248330_at   | <a href="#">AT5G52810</a> | exocyst subunit EXO70 family protein leucine zipper-containing protein<br>Lycopersicon esculentum, PIR:S21495; contains Pfam domain PF03081:           | 1.547 |
| 259297_at   | <a href="#">AT3G05360</a> | ornithine cyclodeaminase/mu-crystallin family protein contains Pfam<br>PF02423: Ornithine cyclodeaminase/mu-crystallin family                          | 1.541 |
| 255811_at   | <a href="#">AT4G10250</a> | disease resistance family protein / LRR family protein contains leucine rich<br>repeat domains Pfam:PF00560, INTERPRO:IPR001611; similar to elicitor-  | 1.534 |
| 248564_at   | <a href="#">AT5G49700</a> | 22.0 kDa ER small heat shock protein (HSP22.0-ER) identical to<br>endomembrane-localized small heat shock protein GI:511795 from                       | 1.53  |
|             |                           | DNA-binding protein-related contains Pfam domain PF03479: Domain of<br>unknown function (DUF296), found in AT-hook motifs Pfam:PF02178                 |       |

|             |                           |                                                                                                                                                                                                              |       |
|-------------|---------------------------|--------------------------------------------------------------------------------------------------------------------------------------------------------------------------------------------------------------|-------|
| 266364_at   | <a href="#">AT2G41230</a> | expressed protein                                                                                                                                                                                            | 1.522 |
| 247679_at   | <a href="#">AT5G59540</a> | oxidoreductase, 2OG-Fe(II) oxygenase family protein similar to desacetoxyindoline-4-hydroxylase [Catharanthus roseus] GI:2352812;                                                                            | 1.511 |
| 260399_at   | <a href="#">AT1G72520</a> | lipoygenase, putative similar to lipoygenase gi:1495804 [Solanum tuberosum], gi:1654140 [Lycopersicon esculentum], GB:CAB56692                                                                               | 1.509 |
| 244996_at   | <a href="#">ATCG00160</a> | rps2 ribosomal protein S2                                                                                                                                                                                    | 1.508 |
| 247283_at   | <a href="#">AT5G64250</a> | 2-nitropropane dioxygenase family / NPD family contains Pfam profile PF03060: oxidoreductase, 2-nitropropane dioxygenase (NPD) family                                                                        | 1.501 |
| 253911_at   | <a href="#">AT4G27300</a> | S-locus protein kinase, putative similar to receptor protein kinase [Ipomoea trifida] gi 836954 gb AAC23542; contains S-locus glycoprotein family                                                            | 1.501 |
| 257700_at   | <a href="#">AT3G12740</a> | LEM3 (ligand-effect modulator 3) family protein / CDC50 family protein                                                                                                                                       | 1.501 |
| 258682_at   | <a href="#">AT3G08720</a> | Similar to GI:4585976; GI:4966357; GI:4835763; GI:9757735 from serine/threonine protein kinase (PK19) identical to serine/threonine-protein kinase AtPK19 (Ribosomal-protein S6 kinase homolog) [Arabidopsis | 1.5   |
| 261177_at   | <a href="#">AT1G04770</a> | male sterility MS5 family protein similar to male sterility MS5 [Arabidopsis thaliana] GI:3859112; contains Pfam profile PF00515 TPR Domain                                                                  | 1.496 |
| 248606_at   | <a href="#">AT5G49450</a> | bZIP family transcription factor similar to bZIP transcription factor GI:1769891 from [Arabidopsis thaliana]                                                                                                 | 1.493 |
| 253125_at   | <a href="#">AT4G36040</a> | DNAJ heat shock N-terminal domain-containing protein (J11) identical to dnaJ heat shock protein J11 [Arabidopsis thaliana] GI:9843641; contains                                                              | 1.493 |
| 247272_at   | <a href="#">AT5G64300</a> | riboflavin biosynthesis protein, putative (RIBA) similar to SP P47924 {Arabidopsis thaliana}, SP P51695 Riboflavin biosynthesis protein ribA                                                                 | 1.491 |
| 254694_at   | <a href="#">AT4G17900</a> | zinc-binding family protein similar to zinc-binding protein [Pisum sativum] GI:16117799; contains Pfam profile PF04640 : Protein of unknown                                                                  | 1.491 |
| 258452_at   | <a href="#">AT3G22370</a> | alternative oxidase 1a, mitochondrial (AOX1A) identical to GB:Q39215 [SP Q39219] from [Arabidopsis thaliana]                                                                                                 | 1.49  |
| 262899_at   | <a href="#">AT1G59870</a> | ABC transporter family protein similar to PDR5-like ABC transporter GI:1514643 from [Spirodela polyrhiza]                                                                                                    | 1.484 |
| 265662_at   | <a href="#">AT2G24500</a> | zinc finger (C2H2 type) family protein contains Pfam profile: PF00096 zinc finger, C2H2 type                                                                                                                 | 1.484 |
| 253140_at   | <a href="#">AT4G35480</a> | zinc finger (C3HC4-type RING finger) family protein contains Pfam domain PF00097: Zinc finger, C3HC4 type (RING finger)                                                                                      | 1.481 |
| 247125_at   | <a href="#">AT5G66070</a> | zinc finger (C3HC4-type RING finger) family protein contains Pfam profile PF00097 zinc finger, C3HC4 type (RING finger)                                                                                      | 1.469 |
| 253281_at   | <a href="#">AT4G34138</a> | UDP-glucuronosyl/UDP-glucosyl transferase family protein contains Pfam profile: PF00201 UDP-glucuronosyl and UDP-glucosyl transferase                                                                        | 1.468 |
| 254050_s_at | <a href="#">AT4G25690</a> | [AT4G25690, expressed protein];[AT4G25670, expressed protein]                                                                                                                                                | 1.467 |
| 255110_at   | <a href="#">AT4G08770</a> | peroxidase, putative identical to class III peroxidase ATP38 [Arabidopsis thaliana] gi 17530568 gb AAL40851; similar to peroxidase C2 precursor                                                              | 1.465 |
| 264756_at   | <a href="#">AT1G61370</a> | S-locus lectin protein kinase family protein contains Pfam domains, PF00954: S-locus glycoprotein family, PF00069: Protein kinase domain,                                                                    | 1.465 |
| 266101_at   | <a href="#">AT2G37940</a> | expressed protein                                                                                                                                                                                            | 1.464 |
| 257866_at   | <a href="#">AT3G17770</a> | dihydroxyacetone kinase family protein contains Pfam domains, PF02733 DAK1 domain and PF02734: DAK2 domain                                                                                                   | 1.461 |
| 256046_at   | <a href="#">AT1G07130</a> | OB-fold nucleic acid binding domain-containing protein contains InterPro entry IPR004365: OB-fold nucleic acid binding domain                                                                                | 1.46  |
| 266155_at   | <a href="#">AT1G64950</a> | cytochrome P450, putative similar to cytochrome P450 89A2 (CYPLXXXIX) (SP:Q42602) [Arabidopsis thaliana];similar to cytochrome                                                                               | 1.459 |
| 267624_at   | <a href="#">AT2G39660</a> | protein kinase, putative similar to protein kinase gi 166809 gb AAA18853                                                                                                                                     | 1.458 |
| 254241_at   | <a href="#">AT4G23190</a> | protein kinase family protein contains Pfam PF00069: Protein kinase domain                                                                                                                                   | 1.438 |
| 267293_at   | <a href="#">AT2G23810</a> | senescence-associated family protein similar to senescence-associated protein 5 [Hemerocallis hybrid cultivar] gi 3551954 gb AAC34855                                                                        | 1.438 |
| 264400_at   | <a href="#">AT1G61800</a> | glucose-6-phosphate/phosphate translocator, putative similar to glucose-1-phosphate/phosphate-translocator precursor GI:2997591 from [Pisum                                                                  | 1.437 |
| 266290_at   | <a href="#">AT2G29490</a> | glutathione S-transferase, putative similar to glutathione S-transferase 10: 1A [Arabidopsis thaliana] SWISS-PROT:P46421                                                                                     | 1.437 |
| 250252_at   | <a href="#">AT5G13750</a> | transporter-related                                                                                                                                                                                          | 1.435 |
| 256300_at   | <a href="#">AT1G69490</a> | no apical meristem (NAM) family protein similar to N-term half of NAC domain protein NAM [Arabidopsis thaliana] GI:4325282                                                                                   | 1.432 |
| 259018_at   | <a href="#">AT3G07390</a> | auxin-responsive protein / auxin-induced protein (AIR12) identical (with 1 residue gap) to auxin-induced protein AIR12 GI:11357190 [Arabidopsis                                                              | 1.424 |
| 262382_at   | <a href="#">AT1G72920</a> | disease resistance protein (TIR-NBS class), putative domain signature TIF NBS exists, suggestive of a disease resistance protein.                                                                            | 1.422 |

|           |                           |                                                                                                                                                    |       |
|-----------|---------------------------|----------------------------------------------------------------------------------------------------------------------------------------------------|-------|
| 260387_at | <a href="#">AT1G74100</a> | sulfoltransferase family protein similar to SPIP52837 Flavonol 4 sulfoltransferase (EC 2.8.2.-) (F4-ST) (Flaveria chloraefolia); contains Pfam     | 1.419 |
| 265093_at | <a href="#">AT1G03905</a> | ABC transporter family protein similar to NBD-like protein GB:AAD20643 heavy-metal-associated domain-containing protein similar to farnesylate     | 1.419 |
| 250944_at | <a href="#">AT5G03380</a> | protein ATPF2 [GI:4097545]; contains Pfam profile PF00403: Heavy-meta                                                                              | 1.414 |
| 260362_at | <a href="#">AT1G70530</a> | protein kinase family protein contains Pfam domain, PF00069: Protein kinase domain                                                                 | 1.408 |
| 256185_at | <a href="#">AT1G51700</a> | Dof-type zinc finger domain-containing protein (ADOF1) identical to cDNA adof1 mRNA for dof zinc finger protein, GI:3608260; contains Pfam profile | 1.407 |
| 256756_at | <a href="#">AT3G25610</a> | phospholipid-transporting ATPase (EC 3.6.3.1) from Mus musculus                                                                                    | 1.406 |
| 258787_at | <a href="#">AT3G11840</a> | U-box domain-containing protein low similarity to immediate-early funga elicitor protein CMPG1 [Petroselinum crispum] GI:14582200; contains        | 1.403 |
| 262455_at | <a href="#">AT1G11310</a> | seven transmembrane MLO family protein / MLO-like protein 2 (MLO2) identical to membrane protein Mlo2 [Arabidopsis thaliana]                       | 1.403 |
| 244932_at | <a href="#">ATCG01060</a> | psaC PSI 9KDa protein                                                                                                                              | 1.402 |
| 252928_at | <a href="#">AT4G38940</a> | kelch repeat-containing F-box family protein low similarity to SKP1 interacting partner 6 [Arabidopsis thaliana] GI:10716957; contains Pfam        | 1.399 |
| 266536_at | <a href="#">AT2G16900</a> | expressed protein                                                                                                                                  | 1.398 |
| 265679_at | <a href="#">AT2G32240</a> | expressed protein contains Pfam profile: PF04508 viral A-type inclusion protein repeat                                                             | 1.393 |
| 253637_at | <a href="#">AT4G30390</a> | expressed protein                                                                                                                                  | 1.39  |
| 245247_at | <a href="#">AT4G17230</a> | scarecrow-like transcription factor 13 (SCL13)                                                                                                     | 1.383 |
| 266821_at | <a href="#">AT2G44840</a> | ethylene-responsive element-binding protein, putative                                                                                              | 1.382 |
| 246935_at | <a href="#">AT5G25350</a> | F-box family protein contains Pfam PF00646: F-box domain and Pfam PF00560: Leucine Rich Repeat (6 copies); similar to F-box protein FBL6           | 1.381 |
| 259749_at | <a href="#">AT1G71100</a> | ribose 5-phosphate isomerase-related similar to ribose-5-phosphate isomerase GI:18654317 from [Spinacia oleracea]                                  | 1.381 |
| 252679_at | <a href="#">AT3G44260</a> | CCR4-NOT transcription complex protein, putative similar to SWISS-PROT:Q9UFF9 CCR4-NOT transcription complex, subunit 8 (CAF1-like)                | 1.377 |
| 249752_at | <a href="#">AT5G24660</a> | expressed protein                                                                                                                                  | 1.376 |
| 253630_at | <a href="#">AT4G30490</a> | AFG1-like ATPase family protein contains Pfam profile: PF03969 AFG1 like ATPase                                                                    | 1.375 |
| 266072_at | <a href="#">AT2G18700</a> | glycosyl transferase family 20 protein / trehalose-phosphatase family protein similar to trehalose-6-phosphate synthase SL-TPS/P [Selaginella      | 1.371 |
| 254293_at | <a href="#">AT4G23060</a> | calmodulin-binding family protein contains Pfam profile PF00612: IQ calmodulin-binding motif                                                       | 1.366 |
| 257216_at | <a href="#">AT3G14990</a> | 4-methyl-5(b-hydroxyethyl)-thiazole monophosphate biosynthesis protein putative supporting cDNA gi 11908017 gb AF326856.1 ; contains Pfam          | 1.362 |
| 250829_at | <a href="#">AT5G04720</a> | disease resistance protein (CC-NBS-LRR class), putative domain signature CC-NBS-LRR exists, suggestive of a disease resistance protein.            | 1.355 |
| 263704_at | <a href="#">AT1G31130</a> | expressed protein                                                                                                                                  | 1.355 |
| 267280_at | <a href="#">AT2G19450</a> | diacylglycerol O-acyltransferase / acyl CoA:diacylglycerol acyltransferase (DGAT) identical to gi:5050913, gi:6625553                              | 1.349 |
| 257805_at | <a href="#">AT3G18830</a> | mannitol transporter, putative similar to mannitol transporter [Apium graveolens var. dulce] GI:12004316; contains Pfam profile PF00083:           | 1.346 |
| 264867_at | <a href="#">AT1G24150</a> | formin homology 2 domain-containing protein / FH2 domain-containing protein contains formin homology 2 domain, Pfam:PF02181                        | 1.344 |
| 256525_at | <a href="#">AT1G66180</a> | aspartyl protease family protein contains Pfam PF00026: Eukaryotic aspartyl protease profile; similar to CND41, chloroplast nucleoid DNA           | 1.343 |
| 265674_at | <a href="#">AT2G32190</a> | expressed protein                                                                                                                                  | 1.343 |
| 260314_at | <a href="#">AT1G63830</a> | proline-rich family protein contains proline-rich extensin domains INTERPRO:IPR002965; contains 1 predicted transmembrane domain                   | 1.34  |
| 267451_at | <a href="#">AT2G33710</a> | AP2 domain-containing transcription factor family protein similar to RAP2.6 (GI:17065542) [Arabidopsis thaliana]                                   | 1.34  |
| 262635_at | <a href="#">AT1G06570</a> | 4-hydroxyphenylpyruvate dioxygenase (HPD) identical to 4-hydroxyphenylpyruvate dioxygenase (HPD) SP:P93836 [Arabidopsis                            | 1.338 |
| 250289_at | <a href="#">AT5G13190</a> | expressed protein                                                                                                                                  | 1.337 |
| 265943_at | <a href="#">AT2G19570</a> | cytidine deaminase (CDD) / cytidine aminohydrolase identical to cytidine deaminase (CDD) [Arabidopsis thaliana] GI:3046700                         | 1.337 |

|             |                           |                                                                                                                                                            |       |
|-------------|---------------------------|------------------------------------------------------------------------------------------------------------------------------------------------------------|-------|
| 255568_at   | <a href="#">AT4G01250</a> | WRKY family transcription factor contains Pfam profile: PF03106 WRKY DNA-binding domain                                                                    | 1.336 |
| 264460_at   | <a href="#">AT1G10170</a> | NF-X1 type zinc finger family protein contains Pfam PF01422: NF-X1 type zinc finger; similar to transcriptional repressor NF-X1 (SP:Q12986) [Homo          | 1.332 |
| 254652_at   | <a href="#">AT4G18170</a> | WRKY family transcription factor similar to DNA-binding protein 2 GI:4322940 from [Nicotiana tabacum]; contains Pfam profile: PF03106                      | 1.323 |
| 255524_at   | <a href="#">AT4G02330</a> | pectinesterase family protein contains Pfam profile: PF0109E                                                                                               | 1.323 |
| 262772_at   | <a href="#">AT1G13210</a> | pectinesterase haloacid dehalogenase-like hydrolase family protein similar to Potentilla phospholipid-transporting ATPase (EC 3.6.3.1) (Chromaffin granule | 1.321 |
| 258830_at   | <a href="#">AT3G07090</a> | expressed protein                                                                                                                                          | 1.318 |
| 249987_at   | <a href="#">AT5G18490</a> | expressed protein                                                                                                                                          | 1.316 |
| 250990_at   | <a href="#">AT5G02280</a> | [AT5G02280, synbindin, putative similar to Swiss-Prot:Q9ES56 synbindin (TRS23 homolog) [Mus musculus]];[AT5G02290, protein kinase, putative                | 1.314 |
| 267076_at   | <a href="#">AT2G41090</a> | calmodulin-like calcium-binding protein, 22 kDa (CaBP-22) identical to SP P30187 22 kDa calmodulin-like calcium-binding protein (CABP-22)                  | 1.309 |
| 254215_at   | <a href="#">AT4G23700</a> | cation/hydrogen exchanger, putative (CHX17) similar to Na <sup>+</sup> /H <sup>+</sup> exchanging protein slr1595 - Synechocystis sp., EMBL:D90902;        | 1.307 |
| 262832_s_at | <a href="#">AT1G14870</a> | expressed protein similar to PGPS/D12 [Petunia x hybrida] GI:4105794; contains Pfam profile PF04749: Protein of unknown function, DUF614                   | 1.301 |
| 252422_at   | <a href="#">AT3G47550</a> | zinc finger (C3HC4-type RING finger) family protein contains Pfam domain, PF00097: Zinc finger, C3HC4 type (RING finger)                                   | 1.297 |
| 250580_at   | <a href="#">AT5G07440</a> | glutamate dehydrogenase 2 (GDH2) identical to glutamate dehydrogenase 2 (GDH 2) [Arabidopsis thaliana] SWISS-PROT:Q38946                                   | 1.296 |
| 261193_at   | <a href="#">AT1G32920</a> | expressed protein                                                                                                                                          | 1.296 |
| 256526_at   | <a href="#">AT1G66090</a> | disease resistance protein (TIR-NBS class), putative domain signature TIF NBS exists, suggestive of a disease resistance protein.                          | 1.295 |
| 258979_at   | <a href="#">AT3G09440</a> | heat shock cognate 70 kDa protein 3 (HSC70-3) (HSP70-3) identical to SP O65719 Heat shock cognate 70 kDa protein 3 (Hsc70.3) (Arabidopsis                  | 1.293 |
| 258100_at   | <a href="#">AT3G23550</a> | [AT3G23550, MATE efflux family protein similar to ripening regulated protein DDTFR18 [Lycopersicon esculentum] GI:12231296; contains Pfam                  | 1.292 |
| 267230_at   | <a href="#">AT2G44080</a> | expressed protein                                                                                                                                          | 1.292 |
| 261453_at   | <a href="#">AT1G21130</a> | O-methyltransferase, putative similar to GI:2781394                                                                                                        | 1.291 |
| 246327_at   | <a href="#">AT1G16670</a> | protein kinase family protein contains protein kinase domain Pfam:PF00069; similar to receptor-like serine/threonine kinase GI:246592;                     | 1.286 |
| 262085_at   | <a href="#">AT1G56060</a> | expressed protein                                                                                                                                          | 1.286 |
| 265737_at   | <a href="#">AT2G01180</a> | phosphatidic acid phosphatase family protein / PAP2 family protein similar to phosphatidic acid phosphatase 2a2 [Cavia porcellus] GI:3641336;              | 1.285 |
| 250287_at   | <a href="#">AT5G13330</a> | AP2 domain-containing transcription factor family protein similar to AP2 domain containing protein RAP2.6, Arabidopsis thaliana,                           | 1.284 |
| 261899_at   | <a href="#">AT1G80820</a> | cinnamoyl-CoA reductase, putative identical to CCR2 (GI:12407990), similar to cinnamoyl CoA reductase from Eucalyptus gunnii [GI:2058311]                  | 1.284 |
| 262165_at   | <a href="#">AT1G75020</a> | phospholipid/glycerol acyltransferase family protein contains Pfam profile PF01553 Acyltransferase                                                         | 1.282 |
| 258501_at   | <a href="#">AT3G06780</a> | [AT3G06780, glycine-rich protein];[AT3G06790, plastid developmental protein DAG, putative similar to DAG protein, chloroplast precursor                    | 1.281 |
| 261618_at   | <a href="#">AT1G33110</a> | MATE efflux family protein similar to ripening regulated protein DDTFR18 [Lycopersicon esculentum] GI:12231296; contains Pfam profile PF01554:             | 1.281 |
| 258606_at   | <a href="#">AT3G02840</a> | [AT3G02840, immediate-early fungal elicitor family protein similar to immediate-early fungal elicitor protein CMPG1 (GI:14582200)                          | 1.279 |
| 267069_at   | <a href="#">AT2G41010</a> | VQ motif-containing protein contains PF05678: VQ motif transformer serine/arginine-rich ribonucleoprotein, putative similar to                             | 1.272 |
| 261081_at   | <a href="#">AT1G07350</a> | GB:Y09506 from [Nicotiana tabacum] (Plant Mol. Biol. 35 (3), 261-269                                                                                       | 1.268 |
| 258683_at   | <a href="#">AT3G08760</a> | protein kinase family protein contains protein kinase domain Pfam:PF00069                                                                                  | 1.267 |
| 249770_at   | <a href="#">AT5G24110</a> | WRKY family transcription factor                                                                                                                           | 1.265 |
| 251705_at   | <a href="#">AT3G56400</a> | WRKY family transcription factor DNA-binding protein 4 WRKY4 - Nicotiana tabacum, EMBL:AF193771                                                            | 1.261 |
| 256454_at   | <a href="#">AT1G75280</a> | isoflavone reductase, putative identical to SP P52577 Isoflavone reductase homolog P3 (EC 1.3.1.-) (Arabidopsis thaliana); contains Pfam profile           | 1.261 |
| 245119_at   | <a href="#">AT2G41640</a> | expressed protein contains Pfam domain, PF04577: Protein of unknown function (DUF563)                                                                      | 1.259 |

|             |                           |                                                                                                                                                                                                                  |       |
|-------------|---------------------------|------------------------------------------------------------------------------------------------------------------------------------------------------------------------------------------------------------------|-------|
| 249237_at   | <a href="#">AT5G42050</a> | expressed protein similar to gda-1 [Pisum sativum] GI:2765418                                                                                                                                                    | 1.258 |
| 258939_at   | <a href="#">AT3G10020</a> | expressed protein                                                                                                                                                                                                | 1.257 |
| 259792_at   | <a href="#">AT1G29690</a> | expressed protein                                                                                                                                                                                                | 1.256 |
| 255039_at   | <a href="#">AT4G09570</a> | calcium-dependent protein kinase, putative / CDPK, putative similar to calcium-dependent protein kinase [Arabidopsis thaliana]                                                                                   | 1.252 |
| 264788_at   | <a href="#">AT2G17880</a> | DNAJ heat shock protein, putative similar to J11 protein [Arabidopsis thaliana] GI:9843641; contains Pfam profile PF00226 DnaJ domain                                                                            | 1.251 |
| 266231_at   | <a href="#">AT2G02220</a> | leucine-rich repeat transmembrane protein kinase, putative                                                                                                                                                       | 1.25  |
| 245017_at   | <a href="#">ATCG00510</a> | psal PSI I protein                                                                                                                                                                                               | 1.24  |
| 248713_at   | <a href="#">AT5G48180</a> | kelch repeat-containing protein contains Pfam PF01344: Kelch motif (5 repeats) ;similar to Tip elongation aberrant protein 1 (Cell polarity protein [AT4G02520, glutathione S-transferase, putative];[AT2G02930, | 1.24  |
| 266746_s_at | <a href="#">AT4G02520</a> | glutathione S-transferase, putative]                                                                                                                                                                             | 1.238 |
| 248563_at   | <a href="#">AT5G49690</a> | UDP-glucuronosyl/UDP-glucosyl transferase family protein contains Pfam profile: PF00201 UDP-glucuronosyl and UDP-glucosyl transferase                                                                            | 1.237 |
| 252009_at   | <a href="#">AT3G52800</a> | zinc finger (AN1-like) family protein contains Pfam domain, PF01428: AN1 like Zinc finger                                                                                                                        | 1.235 |
| 248230_at   | <a href="#">AT5G53830</a> | VQ motif-containing protein contains PF05678: VQ motif                                                                                                                                                           | 1.234 |
| 252957_at   | <a href="#">AT4G38680</a> | cold-shock DNA-binding family protein contains Pfam domains PF00313: 'Cold-shock' DNA-binding domain and PF00098: Zinc knuckle                                                                                   | 1.231 |
| 265327_at   | <a href="#">AT2G18210</a> | expressed protein                                                                                                                                                                                                | 1.229 |
| 258094_at   | <a href="#">AT3G14690</a> | cytochrome P450, putative similar to GB:Q05047 from [Catharanthus roseus]                                                                                                                                        | 1.228 |
| 254248_at   | <a href="#">AT4G23270</a> | protein kinase family protein contains Pfam PF00069: Protein kinase domain                                                                                                                                       | 1.227 |
| 252533_at   | <a href="#">AT3G46110</a> | expressed protein                                                                                                                                                                                                | 1.226 |
| 255080_at   | <a href="#">AT4G09030</a> | arabinogalactan-protein (AGP10) identical to gi 10880497 gb AAG24278 supported by Ceres cDNA 265772                                                                                                              | 1.224 |
| 264986_at   | <a href="#">AT1G27130</a> | glutathione S-transferase, putative similar to glutathione S-transferase GB AAF22517 GI:6652870 from [Papaver somniferum]                                                                                        | 1.224 |
| 256999_at   | <a href="#">AT3G14200</a> | DNAJ heat shock N-terminal domain-containing protein low similarity to SP O75190 DJB6_HUMAN DnaJ homolog subfamily B member 6 (Heat                                                                              | 1.22  |
| 248870_at   | <a href="#">AT5G46710</a> | zinc-binding family protein similar zinc-binding protein [Pisum sativum] GI:16117799; contains Pfam profile PF04640 : Protein of unknown                                                                         | 1.217 |
| 256968_at   | <a href="#">AT3G21070</a> | ATP-NAD kinase family protein contains Pfam domain, PF01513: ATP-NAD kinase                                                                                                                                      | 1.217 |
| 267381_at   | <a href="#">AT2G26190</a> | calmodulin-binding family protein contains Pfam profile PF00612: IQ calmodulin-binding motif                                                                                                                     | 1.217 |
| 264107_s_at | <a href="#">AT2G13800</a> | [AT2G13800, leucine-rich repeat family protein / protein kinase family protein contains Pfam domains PF00560: Leucine Rich Repeat and                                                                            | 1.212 |
| 267392_at   | <a href="#">AT2G44490</a> | glycosyl hydrolase family 1 protein contains Pfam PF00232 : Glycosyl hydrolase family 1 domain; TIGRFAM TIGR01233: 6-phospho-beta-                                                                               | 1.211 |
| 248040_at   | <a href="#">AT5G55970</a> | zinc finger (C3HC4-type RING finger) family protein contains Pfam profile PF00097 zinc finger, C3HC4 type (RING finger)                                                                                          | 1.21  |
| 245019_at   | <a href="#">ATCG00530</a> | ycf10 hypothetical protein                                                                                                                                                                                       | 1.203 |
| 267389_at   | <a href="#">AT2G44460</a> | glycosyl hydrolase family 1 protein contains Pfam PF00232 : Glycosyl hydrolase family 1 domain; TIGRFAM TIGR01233: 6-phospho-beta-                                                                               | 1.201 |
| 266299_at   | <a href="#">AT2G29450</a> | glutathione S-transferase (103-1A) identical to Swiss-Prot:P46421                                                                                                                                                | 1.199 |
| 264841_at   | <a href="#">AT1G03740</a> | glutathione S-transferase 103-1A [Arabidopsis thaliana] protein kinase family protein contains protein kinase domain Pfam:PF00069                                                                                | 1.197 |
| 253273_at   | <a href="#">AT4G34180</a> | cyclase family protein contains Pfam profile: PF04199 putative cyclase                                                                                                                                           | 1.196 |
| 253061_at   | <a href="#">AT4G37610</a> | TAZ zinc finger family protein / BTB/POZ domain-containing protein contains Pfam PF00651 : BTB/POZ domain; contains Pfam PF02135 :                                                                               | 1.192 |
| 253994_at   | <a href="#">AT4G26080</a> | protein phosphatase 2C ABI1 / PP2C ABI1 / abscisic acid-insensitive 1 (ABI1) nearly identical to SP P49597 Protein phosphatase 2C ABI1 (EC                                                                       | 1.191 |
| 251722_at   | <a href="#">AT3G56200</a> | amino acid transporter family protein low similarity to N system amino acids transporter NAT-1 [Mus musculus] GI:7406950; belongs to                                                                             | 1.187 |
| 266792_at   | <a href="#">AT2G02860</a> | sucrose transporter / sucrose-proton symporter (SUC3) identical to sucros transporter [Arabidopsis thaliana] GI:8052190; similar to sucrose                                                                      | 1.187 |

|             |                           |                                                                                                                                                                                                                   |       |
|-------------|---------------------------|-------------------------------------------------------------------------------------------------------------------------------------------------------------------------------------------------------------------|-------|
| 254059_at   | <a href="#">AT4G25200</a> | 23.6 kDa mitochondrial small heat shock protein (HSP23.6-M) contains Pfam profile PF00011: Hsp20/alpha crystallin family                                                                                          | 1.186 |
| 260847_s_at | <a href="#">AT1G17290</a> | alanine aminotransferase, putative similar to alanine aminotransferase from Panicum miliaceum [SP P34106], GB: AAC62456 GI:3694807 from [Zea                                                                      | 1.185 |
| 245015_at   | <a href="#">ATCG00490</a> | rbcl large subunit of riblose-1,5-bisphosphate carboxylase/oxygenase chitinase, putative similar to basic endochitinase CHB4 precursor                                                                            | 1.182 |
| 252421_at   | <a href="#">AT3G47540</a> | SP:Q06209 from [Brassica napus]                                                                                                                                                                                   | 1.177 |
| 245272_at   | <a href="#">AT4G17250</a> | expressed protein                                                                                                                                                                                                 | 1.174 |
| 257822_at   | <a href="#">AT3G25230</a> | peptidyl-prolyl cis-trans isomerase / FK506-binding protein (ROF1) identical to rotamase FKBP (ROF1) GB:U49453 [Arabidopsis thaliana]                                                                             | 1.173 |
| 247293_at   | <a href="#">AT5G64510</a> | expressed protein                                                                                                                                                                                                 | 1.171 |
| 254396_at   | <a href="#">AT4G21680</a> | proton-dependent oligopeptide transport (POT) family protein contains Pfam profile: PF00854 POT family                                                                                                            | 1.17  |
| 256922_at   | <a href="#">AT3G19010</a> | oxidoreductase, 2OG-Fe(II) oxygenase family protein contains similarity to flavonol synthase (FLS) from [Solanum tuberosum] SP Q41452, {Petunia                                                                   | 1.17  |
| 255945_at   | <a href="#">AT5G28610</a> | expressed protein                                                                                                                                                                                                 | 1.169 |
| 260648_at   | <a href="#">AT1G08050</a> | zinc finger (C3HC4-type RING finger) family protein low similarity to SP P79263 Inter-alpha-trypsin inhibitor heavy chain H4 precursor {Sus                                                                       | 1.166 |
| 262801_at   | <a href="#">AT1G21010</a> | expressed protein                                                                                                                                                                                                 | 1.166 |
| 247925_at   | <a href="#">AT5G57560</a> | xyloglucan:xyloglucosyl transferase / xyloglucan endotransglycosylase endo-xyloglucan transferase (TCH4) identical to xyloglucan                                                                                  | 1.16  |
| 255904_at   | <a href="#">AT1G17860</a> | trypsin and protease inhibitor family protein / Kunitz family protein similar to LeMir (miraculin homolog) GI:2654440 from [Lycopersicon esculentum], [ATCG01000, ycf1.1 hypothetical protein];[ATCG01130, ycf1.2 | 1.16  |
| 244993_s_at | <a href="#">ATCG01000</a> | hypothetical protein]                                                                                                                                                                                             | 1.157 |
| 247691_at   | <a href="#">AT5G59720</a> | 18.1 kDa class I heat shock protein (HSP18.1-CI) identical to 18.2 kDa class I heat shock protein (HSP 18.2) (SP:P19037)[Arabidopsis thaliana];                                                                   | 1.147 |
| 247215_at   | <a href="#">AT5G64905</a> | expressed protein                                                                                                                                                                                                 | 1.143 |
| 260975_at   | <a href="#">AT1G53430</a> | [AT1G53430, leucine-rich repeat family protein / protein kinase family protein contains Pfam domains PF00560: Leucine Rich Repeat and                                                                             | 1.14  |
| 262229_at   | <a href="#">AT1G68620</a> | expressed protein similar to PrMC3 [Pinus radiata] GI:5487873                                                                                                                                                     | 1.14  |
| 249339_at   | <a href="#">AT5G41100</a> | expressed protein                                                                                                                                                                                                 | 1.137 |
| 256861_at   | <a href="#">AT3G23920</a> | beta-amylase, putative / 1,4-alpha-D-glucan maltohydrolase, putative similar to beta-amylase enzyme [Arabidopsis thaliana] GI:6065749, beta-scarecrow transcription factor family protein scarecrow-like 11       | 1.135 |
| 252483_at   | <a href="#">AT3G46600</a> | Arabidopsis thaliana, EMBL:AF036307                                                                                                                                                                               | 1.134 |
| 244986_at   | <a href="#">ATCG00820</a> | rps19 ribosomal protein S19                                                                                                                                                                                       | 1.133 |
| 251196_at   | <a href="#">AT3G62950</a> | glutaredoxin family protein contains INTERPRO Domain IPR002109, Glutaredoxin (thioltransferase)                                                                                                                   | 1.132 |
| 258984_at   | <a href="#">AT3G08970</a> | DNAJ heat shock N-terminal domain-containing protein low similarity to PIR A47079 A47079 heat shock protein dnaJ - Lactococcus lactis;                                                                            | 1.132 |
| 247177_at   | <a href="#">AT5G65300</a> | expressed protein                                                                                                                                                                                                 | 1.129 |
| 251028_at   | <a href="#">AT5G02230</a> | haloacid dehalogenase-like hydrolase family protein contains InterPr accession IPR005834: Haloacid dehalogenase-like hydrolase                                                                                    | 1.127 |
| 251187_at   | <a href="#">AT3G62770</a> | transport protein-related weak similarity to Gsa12p [Pichia pastoris GI:18307769; contains 1 WD-40 repeat (PF00400); putative proteins -                                                                          | 1.125 |
| 264929_at   | <a href="#">AT1G60730</a> | aldo/keto reductase family protein contains Pfam profile PF00248 oxidoreductase, aldo/keto reductase family                                                                                                       | 1.123 |
| 256793_at   | <a href="#">AT3G22160</a> | VQ motif-containing protein contains PF05678: VQ motif                                                                                                                                                            | 1.119 |
| 246944_at   | <a href="#">AT5G25450</a> | ubiquinol-cytochrome C reductase complex 14 kDa protein, putative similar to SP P48502 Ubiquinol-cytochrome C reductase complex 14 kDa                                                                            | 1.113 |
| 252193_at   | <a href="#">AT3G50060</a> | myb family transcription factor contains Pfam profile: PF00249 myb-like DNA-binding domain; identical to cDNA MYB-related protein (1107 bp)                                                                       | 1.113 |
| 251804_at   | <a href="#">AT3G55430</a> | glycosyl hydrolase family 17 protein / beta-1,3-glucanase, putative similar to beta-1,3 glucanase GI:7414433 from [Pisum sativum]; contains Pfam                                                                  | 1.109 |
| 265276_at   | <a href="#">AT2G28400</a> | expressed protein contains Pfam profile PF04520: Protein of unknown function, DUF584                                                                                                                              | 1.107 |
| 252827_at   | <a href="#">AT4G39950</a> | cytochrome P450 79B2, putative (CYP79B2) identical to cytochrome P450 (79B2) SP:O81346 from [Arabidopsis thaliana]                                                                                                | 1.105 |

|             |                           |                                                                                                                                                                                                                       |       |
|-------------|---------------------------|-----------------------------------------------------------------------------------------------------------------------------------------------------------------------------------------------------------------------|-------|
| 260047_at   | <a href="#">AT1G73740</a> | glycosyl transferase family 28 protein similar to UDP-N-acetylglucosamine N-acetylmuramyl-(pentapeptide)-pyrophosphoryl-undecaprenol N-                                                                               | 1.105 |
| 254103_at   | <a href="#">AT4G25030</a> | expressed protein                                                                                                                                                                                                     | 1.103 |
| 257053_at   | <a href="#">AT3G15210</a> | ethylene-responsive element-binding factor 4 (ERF4) identical to ethylene responsive element binding factor 4 SP:O80340 from [Arabidopsis                                                                             | 1.101 |
| 245740_at   | <a href="#">AT1G44100</a> | amino acid permease 5, putative (AAP5) nearly identical to amino acid permease (AAP5) GI:608673 from [Arabidopsis thaliana]                                                                                           | 1.1   |
| 248146_at   | <a href="#">AT5G54940</a> | eukaryotic translation initiation factor SUI1, putative similar to SP P32911                                                                                                                                          | 1.1   |
| 263221_at   | <a href="#">AT1G30620</a> | Protein translation factor SUI1 {Saccharomyces cerevisiae}; contains Pfam UDP-D-xylose 4-epimerase, putative (MUR4) similar to SP P55180 UDF glucose 4-epimerase (EC 5.1.3.2) from Bacillus subtilis, GI:3021357 UDP- | 1.098 |
| 260807_at   | <a href="#">AT1G78310</a> | VQ motif-containing protein contains PF05678: VQ motif                                                                                                                                                                | 1.097 |
| 266888_s_at | <a href="#">AT2G44750</a> | [AT2G44750, thiamin pyrophosphokinase, putative similar to thiamin pyrophosphokinase [Mus musculus]                                                                                                                   | 1.096 |
| 251624_at   | <a href="#">AT3G57280</a> | expressed protein contains Pfam profile PF03647: Uncharacterised protein family (UPF0136)                                                                                                                             | 1.095 |
| 247284_at   | <a href="#">AT5G64410</a> | oligopeptide transporter OPT family protein similar to SP P40900 Sexua differentiation process protein isp4 (Schizosaccharomyces pombe);                                                                              | 1.094 |
| 250339_at   | <a href="#">AT5G11670</a> | malate oxidoreductase, putative similar to NADP-dependent malic enzyme (EC 1.1.1.40) (NADP-ME) (SP P12628) (Phaseolus vulgaris)                                                                                       | 1.092 |
| 245018_at   | <a href="#">ATCG00520</a> | ycf4 hypothetical protein                                                                                                                                                                                             | 1.09  |
| 255895_at   | <a href="#">AT1G17990</a> | [AT1G17990, 12-oxophytodienoate reductase, putative similar to OPR1 [GI:3882355] and OPR2 [GI:3882356]];[AT1G18020, 12-oxophytodienoate                                                                               | 1.09  |
| 244936_at   | <a href="#">ATCG01100</a> | ndhA NADH dehydrogenase ND1                                                                                                                                                                                           | 1.088 |
| 252652_at   | <a href="#">AT3G44720</a> | prephenate dehydratase family protein similar to bacterial PheA gene products                                                                                                                                         | 1.087 |
| 250738_at   | <a href="#">AT5G05730</a> | anthranilate synthase, alpha subunit, component I-1 (ASA1) identical to SP P32068                                                                                                                                     | 1.082 |
| 259911_at   | <a href="#">AT1G72680</a> | cinnamyl-alcohol dehydrogenase, putative similar to cinnamyl-alcohol dehydrogenase GB:AA35846 [Medicago sativa], SP Q08350 [Picea                                                                                     | 1.082 |
| 252131_at   | <a href="#">AT3G50930</a> | AAA-type ATPase family protein contains Pfam profile: ATPase family PF00004                                                                                                                                           | 1.081 |
| 250818_at   | <a href="#">AT5G04930</a> | phospholipid-transporting ATPase 1 / aminophospholipid flippase 1 , magnesium-ATPase 1 (ALA1) nearly identical to SP P98204 Phospholipid-                                                                             | 1.077 |
| 260522_x_at | <a href="#">AT2G41730</a> | expressed protein                                                                                                                                                                                                     | 1.075 |
| 264645_at   | <a href="#">AT1G08940</a> | phosphoglycerate/bisphosphoglycerate mutase family protein contain: Pfam profile PF00300: phosphoglycerate mutase family                                                                                              | 1.073 |
| 252939_at   | <a href="#">AT4G39230</a> | isoflavone reductase, putative similar to allergenic isoflavone reductase-like protein Bet v 6.0102 [Betula pendula][GI:10764491]; contains Pfam profile                                                              | 1.072 |
| 264000_at   | <a href="#">AT2G22500</a> | mitochondrial substrate carrier family protein contains Pfam profile PF00153 mitochondrial carrier protein                                                                                                            | 1.071 |
| 252415_at   | <a href="#">AT3G47340</a> | asparagine synthetase 1 [glutamine-hydrolyzing] / glutamine-dependent asparagine synthetase 1 (ASN1) identical to SP P49078 Asparagine                                                                                | 1.07  |
| 257194_at   | <a href="#">AT3G13110</a> | serine O-acetyltransferase (SAT-1) identical to serine acetyltransferase (Sat-1) GI:1184048 [Arabidopsis thaliana]                                                                                                    | 1.066 |
| 258406_at   | <a href="#">AT3G17611</a> | rhomboid family protein / zinc finger protein-related contains Pfam profiles: PF01694: Rhomboid family, PF00641: Zn-finger in Ran binding protein                                                                     | 1.066 |
| 251163_at   | <a href="#">AT3G63310</a> | expressed protein low similarity to N-methyl-D-aspartate receptor associated protein [Drosophila melanogaster] GI:567104; contains Pfam                                                                               | 1.065 |
| 244935_at   | <a href="#">ATCG01090</a> | ndhI NADH dehydrogenase subunit                                                                                                                                                                                       | 1.063 |
| 259626_at   | <a href="#">AT1G42990</a> | bZIP transcription factor family protein contains Pfam profile: PF00170: bZIP transcription factor                                                                                                                    | 1.062 |
| 258275_at   | <a href="#">AT3G15760</a> | expressed protein                                                                                                                                                                                                     | 1.06  |
| 259982_at   | <a href="#">AT1G76410</a> | zinc finger (C3HC4-type RING finger) family protein contains Pfam domain, PF00097: Zinc finger, C3HC4 type (RING finger)                                                                                              | 1.059 |
| 267486_at   | <a href="#">AT2G02800</a> | protein kinase (APK2b) identical to protein kinase APK2b [Arabidopsis thaliana] gi 2852449 dbj BAA24695                                                                                                               | 1.059 |
| 256697_at   | <a href="#">AT3G20660</a> | organic cation transporter family protein similar to organic cation transporter OCT3 [Rattus norvegicus] GI:3273722, organic cation                                                                                   | 1.058 |
| 265067_at   | <a href="#">AT1G03850</a> | glutaredoxin family protein contains INTERPRO Domain IPR002109, Glutaredoxin (thioltransferase)                                                                                                                       | 1.056 |
| 255116_at   | <a href="#">AT4G08850</a> | leucine-rich repeat family protein / protein kinase family protein contains Pfam domains PF00560: Leucine Rich Repeat and PF00069: Protein                                                                            | 1.055 |



|             |                           |                                                                                                                                                                                                                      |       |
|-------------|---------------------------|----------------------------------------------------------------------------------------------------------------------------------------------------------------------------------------------------------------------|-------|
| 260900_s_at | <a href="#">AT1G21400</a> | [AT1G21400, 2-oxoisovalerate dehydrogenase, putative / 3-methyl-oxobutanoate dehydrogenase, putative / branched-chain alpha-keto acid                                                                                | 1.052 |
| 246195_at   | <a href="#">AT4G36410</a> | ubiquitin-conjugating enzyme 17 (UBC17) E2; identical to gi:2801446                                                                                                                                                  | 1.051 |
| 263228_at   | <a href="#">AT1G30700</a> | FAD-binding domain-containing protein similar to SP P30986 reticuline oxidase precursor (Berberine-bridge-forming enzyme) (BBE)                                                                                      | 1.051 |
| 257062_at   | <a href="#">AT3G18290</a> | zinc finger protein-related weak alignment to Pfam profiles: PF00097 Zinc finger, C3HC4 type (RING finger) (2 copies)                                                                                                | 1.049 |
| 259216_at   | <a href="#">AT3G09000</a> | proline-rich family protein                                                                                                                                                                                          | 1.047 |
| 251200_at   | <a href="#">AT3G63010</a> | expressed protein similar to PrMC3 [Pinus radiata] GI:5487873                                                                                                                                                        | 1.044 |
| 254665_at   | <a href="#">AT4G18340</a> | glycosyl hydrolase family 17 protein similar to elicitor inducible chitinase N SubE76 GI:11071974 from [Nicotiana tabacum]                                                                                           | 1.044 |
| 267289_at   | <a href="#">AT2G23770</a> | protein kinase family protein / peptidoglycan-binding LysM domain containing protein contains Pfam domains, PF00069: Protein kinase ATP-dependent Clp protease ATP-binding subunit (ClpD), (ERD1)                    | 1.043 |
| 248487_at   | <a href="#">AT5G51070</a> | SAG15/ERD1; identical to ERD1 protein GI:497629, SP:P42762 from                                                                                                                                                      | 1.042 |
| 260741_at   | <a href="#">AT1G15040</a> | glutamine amidotransferase-related                                                                                                                                                                                   | 1.042 |
| 256050_at   | <a href="#">AT1G07000</a> | exocyst subunit EXO70 family protein similar to leucine zipper protein GI:10177020 from [Arabidopsis thaliana] contains Pfam domain PF03081: DNAJ heat shock N-terminal domain-containing protein (J20) identical to | 1.041 |
| 254688_at   | <a href="#">AT4G13830</a> | DnaJ-like protein [Arabidopsis thaliana] GI:6691127; similar to SP Q05646                                                                                                                                            | 1.039 |
| 254532_at   | <a href="#">AT4G19660</a> | ankyrin repeat family protein / BTB/POZ domain-containing protein contains Pfam domain, PF00023: Ankyrin repeat and Pfam domain, serine/threonine protein kinase, putative similar to Pto kinase interactor          | 1.037 |
| 266749_at   | <a href="#">AT2G47060</a> | (Pti1)[Lycopersicon esculentum] gi 3668069 gb AAC61805                                                                                                                                                               | 1.037 |
| 245013_at   | <a href="#">ATCG00470</a> | atpE ATPase epsilon subunit                                                                                                                                                                                          | 1.036 |
| 260206_at   | <a href="#">AT1G70740</a> | protein kinase family protein contains protein kinase domain Pfam:PF00069                                                                                                                                            | 1.035 |
| 264026_at   | <a href="#">AT2G21060</a> | cold-shock DNA-binding family protein / glycine-rich protein (GRP2) identical to Glycine-rich protein 2b (AtGRP2b) [Arabidopsis thaliana]                                                                            | 1.035 |
| 250025_at   | <a href="#">AT5G18290</a> | major intrinsic protein-related / MIP-related contains weak similarity to Pfam profile: MIP PF00230; annotated based on segmental duplication                                                                        | 1.032 |
| 266995_at   | <a href="#">AT2G34500</a> | cytochrome P450 family protein similar to Cytochrome P450 61 (C-22 sterol desaturase) (SP:P54781) {Saccharomyces cerevisiae}                                                                                         | 1.029 |
| 249125_at   | <a href="#">AT5G43450</a> | 2-oxoglutarate-dependent dioxygenase, putative similar to 2A6 (GI:599622 and tomato ethylene synthesis regulatory protein E8 (SP P10967)                                                                             | 1.027 |
| 245313_at   | <a href="#">AT4G15420</a> | PRLI-interacting factor K nearly identical to PRLI-interacting factor K [Arabidopsis thaliana] GI:11139266; contains Pfam profiles PF03152: mitogen-activated protein kinase kinase (MAPKK), putative (MKK4,         | 1.024 |
| 256183_at   | <a href="#">AT1G51660</a> | identical to MAP kinase kinase 4 [Arabidopsis thaliana]                                                                                                                                                              | 1.021 |
| 249393_at   | <a href="#">AT5G40170</a> | disease resistance family protein contains leucine rich-repeat (LRR domains Pfam:PF00560, INTERPRO:IPR001611; similar to Cf-4                                                                                        | 1.02  |
| 259977_at   | <a href="#">AT1G76590</a> | zinc-binding family protein similar to zinc-binding protein [Pisum sativum] GI:16117799; contains Pfam profile PF04640 : Protein of unknown                                                                          | 1.02  |
| 252851_at   | <a href="#">AT4G40080</a> | epsin N-terminal homology (ENTH) domain-containing protein / clathrin assembly protein-related contains Pfam PF01417: ENTH domain. ENTH                                                                              | 1.018 |
| 244912_at   | <a href="#">ATMG00830</a> | ccb382 cytochrome c biogenesis orf382                                                                                                                                                                                | 1.017 |
| 258114_at   | <a href="#">AT3G14650</a> | [AT3G14650, cytochrome P450, putative similar to GB:Q05047 from [Catharanthus roseus]];[AT3G14660, cytochrome P450, putative similar to                                                                              | 1.017 |
| 264660_at   | <a href="#">AT1G09940</a> | glutamyl-tRNA reductase 2 / GluTR (HEMA2) identical to glutamyl-tRNA reductase 2, chloroplast [SP P49294]                                                                                                            | 1.017 |
| 254508_at   | <a href="#">AT4G20170</a> | expressed protein                                                                                                                                                                                                    | 1.016 |
| 266834_s_at | <a href="#">AT2G30020</a> | protein phosphatase 2C, putative / PP2C, putative similar to protein phosphatase 2C (GI:4587992){Arabidopsis thaliana}                                                                                               | 1.014 |
| 264279_s_at | <a href="#">AT1G78820</a> | curculin-like (mannose-binding) lectin family protein / PAN domain containing protein similar to S locus glycoprotein [Brassica rapa]                                                                                | 1.012 |
| 248208_at   | <a href="#">AT5G53980</a> | homeobox-leucine zipper family protein contains Pfam PF00046                                                                                                                                                         | 1.011 |
| 251649_at   | <a href="#">AT3G57330</a> | Homeobox domain; similar to homeobox protein PpHB5 (GI:7415622) calcium-transporting ATPase, plasma membrane-type, putative / Ca2+ ATPase, putative (ACA11) identical to SP Q9M2L4 ACAB_ARATH                        | 1.009 |
| 256972_at   | <a href="#">AT3G21140</a> | expressed protein                                                                                                                                                                                                    | 1.009 |
| 245008_at   | <a href="#">ATCG00360</a> | ycf3 hypothetical protein                                                                                                                                                                                            | 1.007 |

|             |                           |                                                                                                                                                                                                                                                                                                |        |
|-------------|---------------------------|------------------------------------------------------------------------------------------------------------------------------------------------------------------------------------------------------------------------------------------------------------------------------------------------|--------|
| 254847_at   | <a href="#">AT4G11840</a> | [AT4G11840, phospholipase D gamma 3 / PLD gamma 3 (PLDGAMMA3) identical to phospholipase D gamma 3 sp:Q9T052 from [Arabidopsis AP2 domain-containing transcription factor, putative similar to AP2 domain containing protein RAP2.4 GI:2281633 from [Arabidopsis thaliana]                     | 1.006  |
| 255926_at   | <a href="#">AT1G22190</a> |                                                                                                                                                                                                                                                                                                | 1.006  |
| 253455_at   | <a href="#">AT4G32020</a> | expressed protein NuLL                                                                                                                                                                                                                                                                         | 1.005  |
| 255967_at   | <a href="#">AT1G22280</a> | protein phosphatase 2C, putative / PP2C, putative similar to protein phosphatase type 2C GI:4336436 from [Lotus japonicus]                                                                                                                                                                     | 1.005  |
| 244998_at   | <a href="#">ATCG00180</a> | rpoC1 RNA polymerase beta' subunit-1                                                                                                                                                                                                                                                           | 1.001  |
| 246755_at   | <a href="#">AT5G27920</a> | F-box family protein contains similarity to leucine-rich repeats containing F box protein FBL3 GI:5919219 from [Homo sapiens]                                                                                                                                                                  | 1.001  |
| 260995_at   | <a href="#">AT1G12120</a> | expressed protein contains Pfam domain PF05904: Plant protein o unknown function (DUF863)                                                                                                                                                                                                      | -1.005 |
| 263333_at   | <a href="#">AT2G03890</a> | phosphatidylinositol 3- and 4-kinase family protein low similarity to phosphatidylinositol 4-kinase type-II beta [Homo sapiens] GI:20159767; chloroplast outer membrane protein, putative similar to chloroplast protein import component Toc159 [Pisum sativum] GI:8489806, chloroplast outer | -1.006 |
| 255482_at   | <a href="#">AT4G02510</a> |                                                                                                                                                                                                                                                                                                | -1.013 |
| 247252_at   | <a href="#">AT5G64770</a> | expressed protein                                                                                                                                                                                                                                                                              | -1.014 |
| 256601_s_at | <a href="#">AT3G28290</a> | [AT3G28290, integrin-related protein 14a identical to At14a protein GI:11994573 [Arabidopsis thaliana] [Gene 230 (1), 33-40 (1999)], At14a                                                                                                                                                     | -1.022 |
| 260494_at   | <a href="#">AT2G41820</a> | leucine-rich repeat transmembrane protein kinase, putative peroxidase 30 (PER30) (P30) (PRXR9) identical to SP Q9LSY7                                                                                                                                                                          | -1.025 |
| 257952_at   | <a href="#">AT3G21770</a> | Peroxidase 30 precursor (EC 1.11.1.7) (Atperox P30) (PRXR9) (ATP7a)                                                                                                                                                                                                                            | -1.026 |
| 253849_at   | <a href="#">AT4G28080</a> | expressed protein                                                                                                                                                                                                                                                                              | -1.033 |
| 259596_at   | <a href="#">AT1G28130</a> | auxin-responsive GH3 family protein similar to auxin-responsive GH: product [Glycine max] GI:18591; contains Pfam profile PF03321: GH3                                                                                                                                                         | -1.034 |
| 259373_at   | <a href="#">AT1G69160</a> | expressed protein                                                                                                                                                                                                                                                                              | -1.036 |
| 259783_at   | <a href="#">AT1G29510</a> | auxin-responsive protein, putative similar to auxin-induced protein 6E (SP:P33083) [Glycine max]                                                                                                                                                                                               | -1.039 |
| 250937_at   | <a href="#">AT5G03230</a> | expressed protein contains Pfam profile PF04520: Protein of unknown function, DUF584                                                                                                                                                                                                           | -1.042 |
| 245947_at   | <a href="#">AT5G19530</a> | spermine/spermidine synthase family protein similar to SP P09158 Spermidine synthase (EC 2.5.1.16) (Putrescine aminopropyltransferase)                                                                                                                                                         | -1.043 |
| 258355_at   | <a href="#">AT3G14330</a> | pentatricopeptide (PPR) repeat-containing protein contains Pfam profile PF01535: PPR repeat                                                                                                                                                                                                    | -1.043 |
| 264315_at   | <a href="#">AT1G70370</a> | BURP domain-containing protein / polygalacturonase, putative similar to polygalacturonase isoenzyme 1 beta subunit [Lycopersicon esculentum]                                                                                                                                                   | -1.044 |
| 245688_at   | <a href="#">AT1G28290</a> | pollen Ole e 1 allergen and extensin family protein similar to arabinogalactan protein [Daucus carota] GI:11322245; contains Pfam                                                                                                                                                              | -1.046 |
| 267481_at   | <a href="#">AT2G02780</a> | leucine-rich repeat transmembrane protein kinase, putative                                                                                                                                                                                                                                     | -1.047 |
| 255587_at   | <a href="#">AT4G01480</a> | inorganic pyrophosphatase, putative [soluble] / pyrophosphate phosphatase, putative / PPase, putative strong similarity to SP Q43187                                                                                                                                                           | -1.049 |
| 258181_at   | <a href="#">AT3G21670</a> | nitrate transporter (NTP3) nearly identical to nitrate transporter [Arabidopsis thaliana] GI:4490323; contains Pfam profile: PF00854 POT                                                                                                                                                       | -1.052 |
| 263989_at   | <a href="#">AT2G42880</a> | mitogen-activated protein kinase, putative / MAPK, putative (MPK20)                                                                                                                                                                                                                            | -1.056 |
| 252238_at   | <a href="#">AT3G49960</a> | mitogen-activated protein kinase (MAPK)(AtMPK20), PMID:12119167 peroxidase, putative identical to peroxidase ATP21a [Arabidopsis thaliana] gi 1546696 emb CAA67339                                                                                                                             | -1.058 |
| 250892_at   | <a href="#">AT5G03760</a> | glycosyl transferase family 2 protein similar to beta-(1-3)-glucosyl transferase GB:AAC62210 GI:3687658 from [Bradyrhizobium japonicum],                                                                                                                                                       | -1.062 |
| 262830_at   | <a href="#">AT1G14700</a> | purple acid phosphatase, putative contains Pfam profile: PF00149 calcineurin-like phosphoesterase; similar to purple acid phosphatase                                                                                                                                                          | -1.069 |
| 265050_at   | <a href="#">AT1G52070</a> | jacalin lectin family protein similar to myrosinase-binding protein homolog [Arabidopsis thaliana] GI:2997767; contains Pfam profile PF01419 jacalin-                                                                                                                                          | -1.071 |
| 246476_at   | <a href="#">AT5G16730</a> | expressed protein weak similarity to microtubule binding protein D-CLIF 190 [Drosophila melanogaster] GI:2773363, SMC2-like condensin                                                                                                                                                          | -1.076 |
| 253736_at   | <a href="#">AT4G28780</a> | GDSL-motif lipase/hydrolase family protein similar to family II lipase EXL3 (GI:15054386), EXL1 (GI:15054382), EXL2 (GI:15054384) [Arabidopsis                                                                                                                                                 | -1.083 |
| 261500_at   | <a href="#">AT1G28400</a> | expressed protein similar to E6 (GI:1000090) [Gossypium barbadense]                                                                                                                                                                                                                            | -1.089 |
| 252353_at   | <a href="#">AT3G48200</a> | expressed protein                                                                                                                                                                                                                                                                              | -1.09  |
| 261594_at   | <a href="#">AT1G33240</a> | trihelix DNA-binding protein, putative similar to GTL1 [Arabidopsis thaliana] GI:2664198                                                                                                                                                                                                       | -1.096 |

|           |                           |                                                                                                                                                                                                                     |        |
|-----------|---------------------------|---------------------------------------------------------------------------------------------------------------------------------------------------------------------------------------------------------------------|--------|
| 258003_at | <a href="#">AT3G29030</a> | expansin, putative (EXP5) identical to expansin At-EXP5 GB:AAB38071 from [Arabidopsis thaliana]; alpha-expansin gene family, PMID:11641069                                                                          | -1.098 |
| 248075_at | <a href="#">AT5G55740</a> | pentatricopeptide (PPR) repeat-containing protein contains INTERPRO:IPR002885 PPR repeats                                                                                                                           | -1.107 |
| 264568_at | <a href="#">AT1G05150</a> | calcium-binding EF hand family protein low similarity to O-linked GlcNAc transferase [Homo sapiens] GI:2266994; contains Pfam profiles PF00036: auxin-responsive factor (ARF10) similar to auxin response factor 1f | -1.115 |
| 265272_at | <a href="#">AT2G28350</a> | GI:6165644 from [Arabidopsis thaliana]; identical to cDNA auxin response meprin and TRAF homology domain-containing protein / MATH domain                                                                           | -1.116 |
| 257673_at | <a href="#">AT3G20370</a> | containing protein similar to ubiquitin-specific protease 12 [Arabidopsis [AT5G40820, FAT domain-containing protein / phosphatidylinositol 3- and 4-kinase family protein similar to Atr protein [Xenopus laevis]   | -1.117 |
| 249347_at | <a href="#">AT5G40820</a> | jacalin lectin family protein similar to myrosinase-binding protein homolog                                                                                                                                         | -1.119 |
| 265048_at | <a href="#">AT1G52050</a> | [Arabidopsis thaliana] GI:2997767; contains Pfam profile PF01419 jacalin-auxin-responsive family protein similar to indole-3-acetic acid inducer                                                                    | -1.119 |
| 266322_at | <a href="#">AT2G46690</a> | protein ARG7 (SP:P32295) [Phaseolus aureus]                                                                                                                                                                         | -1.125 |
| 252207_at | <a href="#">AT3G50370</a> | expressed protein                                                                                                                                                                                                   | -1.128 |
| 247882_at | <a href="#">AT5G57785</a> | expressed protein                                                                                                                                                                                                   | -1.135 |
| 259173_at | <a href="#">AT3G03640</a> | glycosyl hydrolase family 1 protein contains Pfam PF00232 : Glycosyl hydrolase family 1 domain; TIGRFAM TIGR01233: 6-phospho-beta-                                                                                  | -1.141 |
| 262260_at | <a href="#">AT1G70830</a> | [AT1G70830, Bet v I allergen family protein similar to Csf-2 [Cucumis sativus][GI:5762258][J Am Soc Hortic Sci 124, 136-139 (1999)]; contains                                                                       | -1.146 |
| 253004_at | <a href="#">AT4G38280</a> | [AT4G38280, expressed protein unknown protein F4L23.24 Arabidopsis thaliana chromosome II BAC F4L23, PID:g2583136];[AT4G38330,                                                                                      | -1.147 |
| 263183_at | <a href="#">AT1G05570</a> | callose synthase 1 (CAL5) / 1,3-beta-glucan synthase 1 nearly identical to callose synthase 1 catalytic subunit [Arabidopsis thaliana] GI:13649388                                                                  | -1.155 |
| 250207_at | <a href="#">AT5G13930</a> | chalcone synthase / naringenin-chalcone synthase identical to SPIP13114                                                                                                                                             | -1.159 |
| 247191_at | <a href="#">AT5G65310</a> | homeobox-leucine zipper protein 5 (HB-5) / HD-ZIP transcription factor 5 identical to homeobox-leucine zipper protein ATHB-5 (HD-ZIP protein                                                                        | -1.164 |
| 252412_at | <a href="#">AT3G47295</a> | expressed protein                                                                                                                                                                                                   | -1.166 |
| 265342_at | <a href="#">AT2G18300</a> | basic helix-loop-helix (bHLH) family protein contains Pfam profile: PF0001 helix-loop-helix DNA-binding domain ;supported by cDNA                                                                                   | -1.17  |
| 245304_at | <a href="#">AT4G15630</a> | integral membrane protein contains TIGRFAM TIGR01569 : plant integral membrane protein TIGR01569; contains Pfam PF04535 : Domain                                                                                    | -1.171 |
| 247162_at | <a href="#">AT5G65730</a> | xyloglucan:xyloglucosyl transferase, putative / xyloglucan endotransglycosylase, putative / endo-xyloglucan transferase, putative                                                                                   | -1.171 |
| 267619_at | <a href="#">AT2G26730</a> | leucine-rich repeat transmembrane protein kinase, putative                                                                                                                                                          | -1.172 |
| 262577_at | <a href="#">AT1G15290</a> | tetratricopeptide repeat (TPR)-containing protein ESTs gb F20110 and gb F20109 come from this gene; contains Pfam profile PF00515: TPR                                                                              | -1.174 |
| 256751_at | <a href="#">AT3G27170</a> | chloride channel protein (CLC-b) identical to CLC-b chloride channel protein GB:CAA96058 from [Arabidopsis thaliana] (J. Biol. Chem. 271                                                                            | -1.178 |
| 261562_at | <a href="#">AT1G01750</a> | actin-depolymerizing factor, putative strong similarity to SPIP30175 Actin depolymerizing factor (ADF) [Lilium longiflorum]; contains Pfam profile                                                                  | -1.183 |
| 263192_at | <a href="#">AT1G36160</a> | acetyl-CoA carboxylase 1 (ACC1) nearly identical to acetyl-CoA carboxylase 1 (ACC1) [Arabidopsis thaliana] GI:11869927                                                                                              | -1.183 |
| 252911_at | <a href="#">AT4G39510</a> | cytochrome P450 family protein contains Pfam PF00067: Cytochrome P450; similar to Cytochrome P450 86A2 (SP:O23066) [Arabidopsis                                                                                     | -1.186 |
| 260618_at | <a href="#">AT1G53230</a> | TCP family transcription factor 3 (TCP3) identical to transcription factor 3 (TCP3) [Arabidopsis thaliana] (GI:3243274); similar to flower development                                                              | -1.191 |
| 251261_at | <a href="#">AT3G62110</a> | glycoside hydrolase family 28 protein / polygalacturonase (pectinase family protein weak similarity to polygalacturonase [Lycopersicon                                                                              | -1.192 |
| 264926_at | <a href="#">AT1G60660</a> | cytochrome b5 domain-containing protein contains InterPro accession IPR01199: Cytochrome b5                                                                                                                         | -1.195 |
| 256792_at | <a href="#">AT3G22150</a> | pentatricopeptide (PPR) repeat-containing protein contains INTERPRO:IPR002885 PPR repeats                                                                                                                           | -1.197 |
| 265102_at | <a href="#">AT1G30870</a> | cationic peroxidase, putative similar to cationic peroxidase (gi 1232069) similar to EST gb A1100412                                                                                                                | -1.202 |
| 263296_at | <a href="#">AT2G38800</a> | calmodulin-binding protein-related contains similarity to potato calmodulin binding protein PCBP GI:17933110 from [Solanum tuberosum]                                                                               | -1.216 |
| 261804_at | <a href="#">AT1G30530</a> | UDP-glucuronosyl/UDP-glucosyl transferase family protein contains Pfam profile: PF00201 UDP-glucuronosyl and UDP-glucosyl transferase                                                                               | -1.223 |
| 254024_at | <a href="#">AT4G25780</a> | pathogenesis-related protein, putative similar to gene PR-1 protein Medicago truncatula, SPIQ40374; contains Pfam profile PF00188: SCP-                                                                             | -1.226 |
| 251714_at | <a href="#">AT3G56370</a> | leucine-rich repeat transmembrane protein kinase, putative leucine-rich receptor-like protein kinase - Malus domestica, EMBL:AF053127                                                                               | -1.228 |

|             |                           |                                                                                                                                                                                                                   |        |
|-------------|---------------------------|-------------------------------------------------------------------------------------------------------------------------------------------------------------------------------------------------------------------|--------|
| 248393_at   | <a href="#">AT5G52060</a> | BAG domain-containing protein contains Pfam:PF02179 BAG domain                                                                                                                                                    | -1.233 |
| 266131_at   | <a href="#">AT2G45160</a> | scarecrow transcription factor family protein                                                                                                                                                                     | -1.243 |
| 260453_s_at | <a href="#">AT1G72510</a> | expressed protein                                                                                                                                                                                                 | -1.246 |
| 262871_at   | <a href="#">AT1G65010</a> | expressed protein similar to endosome-associated protein (GI:1016368 [Homo sapiens]; similar to Centromeric protein E (CENP-E protein) (Swiss methyladenine glycosylase family protein similar to SP P05100 DNA-3 | -1.246 |
| 249008_at   | <a href="#">AT5G44680</a> | methyladenine glycosylase I (EC 3.2.2.20) (3-methyladenine-DNA                                                                                                                                                    | -1.252 |
| 246275_at   | <a href="#">AT4G36540</a> | basic helix-loop-helix (bHLH) family protein contains Pfam domain PF00010: Helix-loop-helix DNA-binding domain                                                                                                    | -1.255 |
| 262598_at   | <a href="#">AT1G15260</a> | expressed protein EST gb N65467 comes from this gene                                                                                                                                                              | -1.264 |
| 248427_at   | <a href="#">AT5G51750</a> | subtilase family protein similar to subtilisin-like protease GI:3687307 from [Lycopersicon esculentum]                                                                                                            | -1.268 |
| 263841_at   | <a href="#">AT2G36870</a> | xyloglucan:xyloglucosyl transferase, putative / xyloglucan endotransglycosylase, putative / endo-xyloglucan transferase, putative                                                                                 | -1.283 |
| 260693_at   | <a href="#">AT1G32450</a> | proton-dependent oligopeptide transport (POT) family protein contain: Pfam profile: PF00854 POT family                                                                                                            | -1.293 |
| 262614_at   | <a href="#">AT1G13980</a> | pattern formation protein (EMB30) (GNOM) identical to SP Q42510; contains Pfam profile PF01369: Sec7 domain                                                                                                       | -1.293 |
| 252833_at   | <a href="#">AT4G40090</a> | arabinogalactan-protein (AGP3) InDels between the genome sequence and the cDNA prevent identical translations from being annotated; the leucine-rich repeat family protein contains leucine rich-repeat (LRR      | -1.337 |
| 260041_at   | <a href="#">AT1G68780</a> | domains Pfam:PF00560, INTERPRO:IPR001611; contains similarity to proline-rich family protein contains proline-rich region,                                                                                        | -1.346 |
| 251226_at   | <a href="#">AT3G62680</a> | INTERPRO:IPR000694                                                                                                                                                                                                | -1.347 |
| 258293_at   | <a href="#">AT3G23430</a> | phosphate transporter, putative (PHO1) identical to PHO1 protein [Arabidopsis thaliana] GI:20069032; supporting cDNA                                                                                              | -1.347 |
| 259786_at   | <a href="#">AT1G29660</a> | GDSL-motif lipase/hydrolase family protein low similarity to family II lipase EXL1 [Arabidopsis thaliana] GI:15054382; contains InterPro Entry                                                                    | -1.349 |
| 251413_at   | <a href="#">AT3G60320</a> | expressed protein contains Pfam profiles: PF04782: protein of unknown function (DUF632), PF04783: protein of unknown function (DUF630)                                                                            | -1.359 |
| 253495_at   | <a href="#">AT4G31850</a> | [AT4G31850, pentatricopeptide (PPR) repeat-containing protein contains Pfam profile PF01535: PPR repeat];[AT4G31860, protein phosphatase 2C                                                                       | -1.377 |
| 246510_at   | <a href="#">AT5G15410</a> | cyclic nucleotide-regulated ion channel / cyclic nucleotide-gated channel (CNGC2) identical to cyclic nucleotide-gated cation channel GI:3894399                                                                  | -1.386 |
| 258060_at   | <a href="#">AT3G26030</a> | serine/threonine protein phosphatase 2A (PP2A) regulatory subunit B' putative similar to SWISS-PROT:Q28653 serine/threonine protein                                                                               | -1.414 |
| 247871_at   | <a href="#">AT5G57530</a> | [AT5G57530, xyloglucan:xyloglucosyl transferase, putative / xyloglucan endotransglycosylase, putative / endo-xyloglucan transferase, putative                                                                     | -1.443 |
| 250778_at   | <a href="#">AT5G05500</a> | pollen Ole e 1 allergen and extensin family protein contains Pfam domain PF01190: Pollen proteins Ole e I family                                                                                                  | -1.5   |
| 258080_at   | <a href="#">AT3G25930</a> | universal stress protein (USP) family protein contains Pfam PF00582:                                                                                                                                              | -1.504 |
| 246652_at   | <a href="#">AT5G35190</a> | universal stress protein family                                                                                                                                                                                   | -1.506 |
| 257297_at   | <a href="#">AT3G28040</a> | proline-rich extensin-like family protein contains proline-rich extensin domains, INTERPRO:IPR002965                                                                                                              | -1.517 |
| 265175_at   | <a href="#">AT1G23480</a> | leucine-rich repeat transmembrane protein kinase, putative contains Pfam profiles: PF00560 leucine rich repeat, PF00069 eukaryotic protein kinase                                                                 | -1.575 |
| 253255_at   | <a href="#">AT4G34760</a> | glycosyl transferase family 2 protein similar to cellulose synthase from Agrobacterium tumeficiens [gi:710492] and Agrobacterium radiobacter                                                                      | -1.578 |
| 250059_at   | <a href="#">AT5G17820</a> | auxin-responsive family protein auxin-induced protein X15, Glycine max PIR2:JQ1097                                                                                                                                | -1.591 |
| 245567_at   | <a href="#">AT4G14630</a> | peroxidase 57 (PER57) (P57) (PRXR10) identical to SP Q43729                                                                                                                                                       | -1.66  |
| 259790_s_at | <a href="#">AT1G29430</a> | Peroxisome biogenesis factor 1 (PEX1) precursor (EC 1.11.1.7) (Aperox P57) (PRXR10) (ATP13a) germin-like protein (GLP9) identical to germin-like protein subfamily 1                                              | -1.724 |
| 248636_at   | <a href="#">AT5G49080</a> | member 8 [SP Q9LEA7]                                                                                                                                                                                              | -1.742 |
| 259328_at   | <a href="#">AT3G16440</a> | auxin-responsive family protein similar to auxin-induced protein 10a 6E {SP:P33083} [Glycine max]                                                                                                                 | -1.853 |
| 255516_at   | <a href="#">AT4G02270</a> | proline-rich extensin-like family protein contains proline-rich extensin domains, INTERPRO:IPR002965                                                                                                              | -1.913 |
| 246991_at   | <a href="#">AT5G67400</a> | jacalin lectin family protein contains Pfam profile: PF01419 jacalin-like lectin domain; similar to myrosinase-binding protein homolog [Arabidopsis                                                               | -1.93  |
| 264567_s_at | <a href="#">AT1G05250</a> | pollen Ole e 1 allergen and extensin family protein contains Pfam domain PF01190: Pollen proteins Ole e I family                                                                                                  | -2.054 |
|             |                           | peroxidase 73 (PER73) (P73) (PRXR11) identical to SP Q43873                                                                                                                                                       |        |
|             |                           | Peroxisome biogenesis factor 1 (PEX1) precursor (EC 1.11.1.7) (Aperox P73) (PRXR11) (ATP10a) [AT1G05250, peroxidase, putative similar to peroxidase; peroxidase                                                   |        |
|             |                           | ATP11a [Arabidopsis thaliana] gi 1546688 emb CAA67334];[AT1G05240,                                                                                                                                                |        |

|             |                           |                                                                                                                                            |        |
|-------------|---------------------------|--------------------------------------------------------------------------------------------------------------------------------------------|--------|
| 254044_at   | <a href="#">AT4G25820</a> | xyloglucan:xyloglucosyl transferase / xyloglucan endotransglycosylase<br>endo-xyloglucan transferase (XTR9) identical to xyloglucan        | -2.104 |
| 264014_at   | <a href="#">AT2G21210</a> | auxin-responsive protein, putative similar to small auxin-up regulator<br>protein SAUR (GI:3043536) [Raphanus sativus]                     | -2.132 |
| 253998_at   | <a href="#">AT4G26010</a> | peroxidase, putative peroxidase ATP13a - Arabidopsis thaliana<br>PID:e264765; identical to cDNA class III peroxidase ATP35, GI:17530565    | -2.319 |
| 252972_at   | <a href="#">AT4G38840</a> | auxin-responsive protein, putative auxin-inducible SAUR gene, Raphanu<br>sativus,AB000708                                                  | -2.404 |
| 262427_s_at | <a href="#">AT1G47600</a> | [AT1G47600, glycosyl hydrolase family 1 protein contains Pfam PF00232<br>Glycosyl hydrolase family 1 domain; TIGRFAM TIGR01233: 6-phospho- | -2.732 |

**Supp Table 3.** Transcripts significantly enhanced in Zat12 over-expressing plants more than in WT plants in response to the hydrogen peroxide (20mM, 1h)

| GeneNum     | Locus Identifier          | Annotation                                                                                                                                                                                | log2(Zat+/Zat) |
|-------------|---------------------------|-------------------------------------------------------------------------------------------------------------------------------------------------------------------------------------------|----------------|
| 262911_s_at | <a href="#">AT1G59860</a> | 17.6 kDa class I heat shock protein (HSP17.6A-CI) similar to<br>17.5 kDa class I heat shock protein SP:P04793 from [Glycine<br>17.6 kDa class I small heat shock protein (HSP17.6B-CI)    | 5.731          |
| 266294_at   | <a href="#">AT2G29500</a> | contains Pfam PF00011: Hsp20/alpha crystallin family;<br>17.4 kDa class III heat shock protein (HSP17.4-CIII) contains<br>Pfam profile: PF00011 Hsp20/alpha crystallin family; identified | 5.375          |
| 263150_at   | <a href="#">AT1G54050</a> |                                                                                                                                                                                           | 4.8            |
| 246018_at   | <a href="#">AT5G10695</a> | expressed protein                                                                                                                                                                         | 3.325          |
| 246270_at   | <a href="#">AT4G36500</a> | expressed protein                                                                                                                                                                         | 3.291          |
| 256442_at   | <a href="#">AT3G10930</a> | expressed protein                                                                                                                                                                         | 3.148          |
| 249752_at   | <a href="#">AT5G24660</a> | expressed protein                                                                                                                                                                         | 2.862          |
| 254839_at   | <a href="#">AT4G12400</a> | stress-inducible protein, putative similar to sti (stress inducible<br>protein) [Glycine max] GI:872116; contains Pfam profile                                                            | 2.672          |

**Supp Table 4.** Transcripts specifically and significantly enhanced (>2-fold) in Zat12 over-expressing plants in response to hydrogen peroxide (20mM, 1h)

| Array Element | Locus Identifier          | Annotation                                                                                                                                                                                                                                                                                 | log2(Zat+/Zat) |
|---------------|---------------------------|--------------------------------------------------------------------------------------------------------------------------------------------------------------------------------------------------------------------------------------------------------------------------------------------|----------------|
| 251336_at     | <a href="#">AT3G61190</a> | BON1-associated protein 1 (BAP1) identical to BON1-associated protein 1 [Arabidopsis thaliana] GI:15487384; contains Pfam profile                                                                                                                                                          | 1.732          |
| 251640_at     | <a href="#">AT3G57450</a> | expressed protein                                                                                                                                                                                                                                                                          | 1.709          |
| 251428_at     | <a href="#">AT3G60140</a> | glycosyl hydrolase family 1 protein contains Pfam PF00232 : Glycosyl hydrolase family 1 domain; TIGRFAM TIGR01233: 6-phospho-beta-cinnamoyl-CoA reductase family similar to cinnamoyl-CoA reductase from Pinus taeda [GI:17978649], Eucalyptus gunnii [GI:2058311]                         | 1.673          |
| 255787_at     | <a href="#">AT2G33590</a> | expressed protein                                                                                                                                                                                                                                                                          | 1.604          |
| 256518_at     | <a href="#">AT1G66080</a> | zinc finger (C3HC4-type RING finger) family protein contains Pfam profile: PF00097 zinc finger, C3HC4 type (RING finger)                                                                                                                                                                   | 1.511          |
| 261265_at     | <a href="#">AT1G26800</a> | U-box domain-containing protein similar to immediate-early fungal elicitor protein CMPG1 [Petroselinum crispum] GI:14582200; contains ubiquitin family protein contains INTERPRO:IPR000626 ubiquitin domain                                                                                | 1.49           |
| 256522_at     | <a href="#">AT1G66160</a> | protease inhibitor, putative similar to SPIP24076 Glu S.griseus protease inhibitor (BGIA) {Momordica charantia}; contains Pfam MutT/nudix family protein low similarity to SP Q09790 Diadenosine 5',5'''-P1,P6-hexaphosphate hydrolase (EC 3.6.1.-) (Ap6A hydrolase)                       | 1.476          |
| 257784_at     | <a href="#">AT3G26980</a> | protein phosphatase 2C, putative / PP2C, putative protein phosphatase 2C, Schizosaccharomyces pombe, PIR2:S54297                                                                                                                                                                           | 1.468          |
| 266168_at     | <a href="#">AT2G38870</a> | phosphate-responsive protein, putative similar to phi-1 (phosphate-induced gene) [Nicotiana tabacum] GI:3759184; contains Pfam profile                                                                                                                                                     | 1.423          |
| 245777_at     | <a href="#">AT1G73540</a> | expressed protein contains Pfam profile PF05093: Protein of unknown function (DUF689)                                                                                                                                                                                                      | 1.417          |
| 253453_at     | <a href="#">AT4G31860</a> | zinc finger (C3HC4-type RING finger) family protein / ankyrin repeat family protein contains Pfam profile: PF00097 zinc finger, C3HC4                                                                                                                                                      | 1.412          |
| 267336_at     | <a href="#">AT2G19310</a> | expressed protein                                                                                                                                                                                                                                                                          | 1.401          |
| 245757_at     | <a href="#">AT1G35140</a> | SNF7 family protein contains Pfam domain, PF03357: SNF7 family expressed protein similar to PGPS/D12 [Petunia x hybrida] GI:4105794; contains Pfam profile PF04749: Protein of unknown protein phosphatase 2C, putative / PP2C, putative protein phosphatase 2C-fission yeast, PIR2:S54297 | 1.39           |
| 249984_at     | <a href="#">AT5G18400</a> | heat shock factor protein, putative (HSF6) / heat shock transcription factor, putative (HTSF6) identical to heat shock transcription factor 6 calmodulin-9 (CAM9) identical to calmodulin 9 GI:5825602 from [Arabidopsis thaliana]; contains Pfam profile PF00036: EF hand                 | 1.387          |
| 245329_at     | <a href="#">AT4G14365</a> | glutathione peroxidase, putative                                                                                                                                                                                                                                                           | 1.357          |
| 246931_at     | <a href="#">AT5G25170</a> |                                                                                                                                                                                                                                                                                            | 1.347          |
| 258915_at     | <a href="#">AT3G10640</a> |                                                                                                                                                                                                                                                                                            | 1.337          |
| 259841_at     | <a href="#">AT1G52200</a> |                                                                                                                                                                                                                                                                                            | 1.32           |
| 253780_at     | <a href="#">AT4G28400</a> |                                                                                                                                                                                                                                                                                            | 1.316          |
| 247509_at     | <a href="#">AT5G62020</a> |                                                                                                                                                                                                                                                                                            | 1.306          |
| 252037_at     | <a href="#">AT3G51920</a> |                                                                                                                                                                                                                                                                                            | 1.302          |
| 254890_at     | <a href="#">AT4G11600</a> |                                                                                                                                                                                                                                                                                            | 1.276          |

|             |                           |                                                                                                                                                                                               |       |
|-------------|---------------------------|-----------------------------------------------------------------------------------------------------------------------------------------------------------------------------------------------|-------|
| 258665_at   | <a href="#">AT3G08710</a> | thioredoxin family protein similar to thioredoxin H-type GB:P29448 SPIP29448 [Arabidopsis thaliana], Thioredoxin H-type 2 (TRX-H2)                                                            | 1.276 |
| 247240_at   | <a href="#">AT5G64660</a> | U-box domain-containing protein similar to immediate-early fungal elicitor protein CMPG1 [Petroselinum crispum] GI:14582200; contains                                                         | 1.271 |
| 247065_s_at | <a href="#">AT5G66910</a> | [AT5G66910, disease resistance protein (CC-NBS-LRR class), putative domain signature CC-NBS-LRR exists, suggestive of a galactinol synthase, putative similar to galactinol synthase, isoform | 1.257 |
| 263320_at   | <a href="#">AT2G47180</a> | GolS-1 GI:5608497 from [Ajuga reptans]                                                                                                                                                        | 1.257 |
| 245642_at   | <a href="#">AT1G25275</a> | expressed protein                                                                                                                                                                             | 1.251 |
| 253104_at   | <a href="#">AT4G36010</a> | pathogenesis-related thaumatin family protein similar to receptor serine/threonine kinase PR5K [Arabidopsis thaliana] GI:1235680;                                                             | 1.25  |
| 250098_at   | <a href="#">AT5G17350</a> | expressed protein                                                                                                                                                                             | 1.242 |
| 254424_at   | <a href="#">AT4G21510</a> | F-box family protein contains Pfam PF00646: F-box domain; similar to SKP1 interacting partner 2 (SKIP2) TIGR_Ath1:At5g67250                                                                   | 1.24  |
| 255844_at   | <a href="#">AT2G33580</a> | protein kinase family protein / peptidoglycan-binding LysM domain-containing protein protein kinase [Arabidopsis thaliana] GI:2852449;                                                        | 1.238 |
| 256356_s_at | <a href="#">AT1G66500</a> | [AT1G66500, zinc finger (C2H2-type) family protein contains Prosite PS00028: Zinc finger, C2H2 type, domain; similar to S-locus protein 4                                                     | 1.237 |
| 250549_at   | <a href="#">AT5G07860</a> | transferase family protein similar to anthranilate N-hydroxycinnamoyl/benzoyltransferase, Dianthus caryophyllus                                                                               | 1.213 |
| 264524_at   | <a href="#">AT1G10070</a> | branched-chain amino acid aminotransferase 2 / branched-chain amino acid transaminase 2 (BCAT2) identical to SPIQ9M439                                                                        | 1.213 |
| 251237_at   | <a href="#">AT3G62420</a> | bZIP transcription factor family protein similar to common plant regulatory factor 6 GI:9650826 from [Petroselinum crispum]                                                                   | 1.21  |
| 248821_at   | <a href="#">AT5G47070</a> | protein kinase, putative similar to protein kinase [Lophopyrum elongatum] gi 13022177 gb AAK11674                                                                                             | 1.209 |
| 260746_at   | <a href="#">AT1G78380</a> | glutathione S-transferase, putative similar to glutathione transferase GI:2853219 from [Carica papaya]                                                                                        | 1.208 |
| 258201_at   | <a href="#">AT3G13910</a> | expressed protein                                                                                                                                                                             | 1.207 |
| 245251_at   | <a href="#">AT4G17615</a> | calcineurin B-like protein 1 (CBL1) identical to calcineurin B-like protein 1 (GI:3309082) [Arabidopsis thaliana]                                                                             | 1.183 |
| 257785_at   | <a href="#">AT3G26980</a> | ubiquitin family protein contains INTERPRO:IPR000626 ubiquitin domain                                                                                                                         | 1.181 |
| 262148_at   | <a href="#">AT1G52560</a> | 26.5 kDa class I small heat shock protein-like (HSP26.5-P) contains Pfam profile: PF00011 Hsp20/alpha crystallin family; identified in                                                        | 1.177 |
| 253324_at   | <a href="#">AT4G33940</a> | zinc finger (C3HC4-type RING finger) family protein contains Pfam profile: PF00097 zinc finger, C3HC4 type (RING finger)                                                                      | 1.168 |
| 249188_at   | <a href="#">AT5G42830</a> | transferase family protein similar to anthranilate N-hydroxycinnamoyl/benzoyltransferase, Dianthus caryophyllus                                                                               | 1.167 |
| 254083_at   | <a href="#">AT4G24920</a> | protein transport protein SEC61 gamma subunit, putative similar to Swiss-Prot:Q19967 protein transport protein SEC61 gamma subunit                                                            | 1.167 |
| 260005_at   | <a href="#">AT1G67930</a> | [AT1G67930, Golgi transport complex protein-related similar to golgi transport complex protein (GTC90) GB:5453670 [Homo sapiens]                                                              | 1.163 |
| 267493_at   | <a href="#">AT2G30400</a> | ovate family protein 57% similar to ovate protein (GI:23429649) [Lycopersicon esculentum]; contains TIGRFAM TIGR01568 :                                                                       | 1.16  |



|             |                           |                                                                                                                                                                                                                                                                        |       |
|-------------|---------------------------|------------------------------------------------------------------------------------------------------------------------------------------------------------------------------------------------------------------------------------------------------------------------|-------|
| 264777_at   | <a href="#">AT1G08630</a> | L-allo-threonine aldolase-related similar to L-allo-threonine aldolase (EC 4.1.2.-) (L-allo-TA) (L-allo-threonine acetaldehyde-lyase) oxidoreductase, 2OG-Fe(II) oxygenase family protein similar to naringenin,2-oxoglutarate 3-dioxygenase (flavonone-3-hydroxylase) | 1.157 |
| 246098_at   | <a href="#">AT5G20400</a> | touch-responsive protein / calmodulin-related protein 2, touch-induced (TCH2) identical to calmodulin-related protein 2,touch-                                                                                                                                         | 1.157 |
| 249583_at   | <a href="#">AT5G37770</a> |                                                                                                                                                                                                                                                                        | 1.153 |
| 262677_at   | <a href="#">AT1G75860</a> | expressed protein                                                                                                                                                                                                                                                      | 1.148 |
| 248698_at   | <a href="#">AT5G48380</a> | leucine-rich repeat family protein / protein kinase family protein contains protein kinase domain, Pfam:PF00069; contains leucine-rich protein kinase, putative similar to protein kinase [Lophopyrum                                                                  | 1.14  |
| 258650_at   | <a href="#">AT3G09830</a> | elongatum] gi 13022177 gb AAK11674                                                                                                                                                                                                                                     | 1.134 |
| 255504_at   | <a href="#">AT4G02200</a> | drought-responsive family protein similar to drought-induced mRNA, Di19 [Arabidopsis thaliana] gi 469110 emb CAA55321                                                                                                                                                  | 1.129 |
| 248868_at   | <a href="#">AT5G46780</a> | VQ motif-containing protein contains PF05678: VQ motif expressed protein contains Pfam profile: PF04601 protein of unknown function (DUF569                                                                                                                            | 1.127 |
| 257407_at   | <a href="#">AT1G27100</a> |                                                                                                                                                                                                                                                                        | 1.12  |
| 267537_at   | <a href="#">AT2G41880</a> | guanylate kinase 1 (GK-1) identical to guanylate kinase (GK-1) [Arabidopsis thaliana] gi 7861795 gb AAF70408                                                                                                                                                           | 1.107 |
| 248665_at   | <a href="#">AT5G48655</a> | zinc finger (C3HC4-type RING finger) family protein contains Pfam profile: PF00097 zinc finger, C3HC4 type (RING finger)                                                                                                                                               | 1.104 |
| 256221_at   | <a href="#">AT1G56300</a> | DNAJ heat shock N-terminal domain-containing protein similar to SP Q9QY17 DnaJ homolog subfamily B member 8 Mus musculus;                                                                                                                                              | 1.099 |
| 263457_at   | <a href="#">AT2G22300</a> | ethylene-responsive calmodulin-binding protein, putative (SR1) identical to partial sequence of ethylene-induced calmodulin-binding ferredoxin--NADP(+) reductase, putative / adrenodoxin reductase,                                                                   | 1.089 |
| 255230_at   | <a href="#">AT4G05390</a> | putative strong similarity to SP P41345 Ferredoxin--NADP reductase, senescence-associated protein (SEN1) identical to senescence-associated protein GI:1046270 from [Arabidopsis thaliana]                                                                             | 1.088 |
| 253161_at   | <a href="#">AT4G35770</a> |                                                                                                                                                                                                                                                                        | 1.088 |
| 253999_at   | <a href="#">AT4G26200</a> | 1-aminocyclopropane-1-carboxylate synthase, putative / ACC synthase, putative similar to ACC synthase from Malus x domestica,                                                                                                                                          | 1.086 |
| 258105_at   | <a href="#">AT3G23605</a> | UBX domain-containing protein contains Pfam profile PF00789: UBX domain                                                                                                                                                                                                | 1.073 |
| 247864_s_at | <a href="#">AT1G25083</a> | [AT1G25083, anthranilate synthase beta subunit, putative strong similarity to anthranilate synthase beta subunit GI:403434 from                                                                                                                                        | 1.071 |
| 250304_at   | <a href="#">AT5G12110</a> | elongation factor 1B alpha-subunit 1 (eEF1Balpha1) identical to elongation factor 1B alpha-subunit [Arabidopsis thaliana] GI:6686819                                                                                                                                   | 1.065 |
| 259980_at   | <a href="#">AT1G76520</a> | auxin efflux carrier family protein contains auxin efflux carrier domain, Pfam:PF03547                                                                                                                                                                                 | 1.063 |
| 252993_at   | <a href="#">AT4G38540</a> | monooxygenase, putative (MO2) identical to GI:3426064                                                                                                                                                                                                                  | 1.06  |
| 258173_at   | <a href="#">AT3G21630</a> | protein kinase family protein contains protein kinase domain, Pfam:PF00069                                                                                                                                                                                             | 1.059 |
| 264580_at   | <a href="#">AT1G05340</a> | expressed protein                                                                                                                                                                                                                                                      | 1.058 |
| 261225_at   | <a href="#">AT1G20100</a> | expressed protein                                                                                                                                                                                                                                                      | 1.058 |

|           |                           |                                                                                                                                                                                                                                                                                                                                                             |       |
|-----------|---------------------------|-------------------------------------------------------------------------------------------------------------------------------------------------------------------------------------------------------------------------------------------------------------------------------------------------------------------------------------------------------------|-------|
| 247930_at | <a href="#">AT5G57060</a> | expressed protein                                                                                                                                                                                                                                                                                                                                           | 1.055 |
| 251597_at | <a href="#">AT3G57750</a> | protein kinase, putative similar to wall-associated kinase 1 [Arabidopsis thaliana] gi 3549626 emb CAA08794; contains protein molybdopterin biosynthesis protein, putative / molybdenum cofactor biosynthesis enzyme, putative 3' fragment; strong similarity to AP2 domain-containing transcription factor, putative EREBP-3                               | 1.055 |
| 263472_at | <a href="#">AT2G31955</a> | homolog, Stylosanthes hamata, EMBL:U91982                                                                                                                                                                                                                                                                                                                   | 1.055 |
| 252214_at | <a href="#">AT3G50260</a> | expressed protein contains Pfam profile PF04720: Protein of unknown function (DUF506)                                                                                                                                                                                                                                                                       | 1.051 |
| 263265_at | <a href="#">AT2G38820</a> | expressed protein contains Pfam profile PF04576: Protein of unknown function, DUF593                                                                                                                                                                                                                                                                        | 1.048 |
| 250692_at | <a href="#">AT5G06560</a> | protein kinase family protein contains protein kinase domain, Pfam:PF00069                                                                                                                                                                                                                                                                                  | 1.044 |
| 252470_at | <a href="#">AT3G46930</a> | cyclic nucleotide-binding transporter 1 / CNBT1 (CNGC20) identical to cyclic nucleotide-binding transporter 1 (CNBT1) GI:8131898 from DNAJ heat shock N-terminal domain-containing protein similar to SP Q05646 Chaperone protein dnaJ Erysipelothrix rhusiopathiae, expressed protein pEARLI 4 gene product [Arabidopsis thaliana] GI:871782               | 1.043 |
| 258351_at | <a href="#">AT3G17700</a> | [AT2G30870, glutathione S-transferase, putative supported by cDNA GI:443698 GB:D17673];[AT2G30880, pleckstrin homology (PH) Cys/Met metabolism pyridoxal-phosphate-dependent enzyme family protein similar to SP P13254 Methionine gamma-lyase (EC 4.4.1.11)                                                                                                | 1.043 |
| 261901_at | <a href="#">AT1G80920</a> |                                                                                                                                                                                                                                                                                                                                                             | 1.043 |
| 265440_at | <a href="#">AT2G20960</a> |                                                                                                                                                                                                                                                                                                                                                             | 1.04  |
| 267154_at | <a href="#">AT2G30870</a> |                                                                                                                                                                                                                                                                                                                                                             | 1.033 |
| 261957_at | <a href="#">AT1G64660</a> |                                                                                                                                                                                                                                                                                                                                                             | 1.026 |
| 256633_at | <a href="#">AT3G28340</a> | galactinol synthase, putative                                                                                                                                                                                                                                                                                                                               | 1.026 |
| 254861_at | <a href="#">AT4G12040</a> | zinc finger (AN1-like) family protein contains Pfam domains, PF01428: AN1-like Zinc finger and PF01754: A20-like zinc finger                                                                                                                                                                                                                                | 1.021 |
| 264304_at | <a href="#">AT1G78895</a> | expressed protein                                                                                                                                                                                                                                                                                                                                           | 1.02  |
| 249895_at | <a href="#">AT5G22500</a> | acyl CoA reductase, putative / male-sterility protein, putative similar to acyl CoA reductase [Simmondsia chinensis] GI:5020215; contains male sterility MS5 family protein similar to male sterility MS5 [Arabidopsis thaliana] GI:3859112; contains Pfam profile PF00515 choline kinase, putative similar to GmCK2p choline kinase gi 1438881 gb AAC49375 | 1.017 |
| 248676_at | <a href="#">AT5G48850</a> |                                                                                                                                                                                                                                                                                                                                                             | 1.015 |
| 261506_at | <a href="#">AT1G71697</a> | inositol polyphosphate 5-phosphatase II (IP5PII) nearly identical to inositol polyphosphate 5-phosphatase II [Arabidopsis thaliana]                                                                                                                                                                                                                         | 1.013 |
| 254707_at | <a href="#">AT4G18010</a> | heat shock factor protein 4 (HSF4) / heat shock transcription factor 4 (HSTF4) identical to heat shock transcription factor 4 (HSF4)                                                                                                                                                                                                                        | 1.005 |
| 246214_at | <a href="#">AT4G36990</a> |                                                                                                                                                                                                                                                                                                                                                             | 1.004 |

**Supp Table 5.** Transcripts significantly enhanced/suppressed (>2-fold) in Zat12 over-expressing plants in response to hydrogen peroxide (20mM, 1h)

| Array Element | Locus Identifier          | Annotation                                                                                                                                | log2(Zat+/Zat) |
|---------------|---------------------------|-------------------------------------------------------------------------------------------------------------------------------------------|----------------|
| 262911_s_at   | <a href="#">AT1G59860</a> | 17.6 kDa class I heat shock protein (HSP17.6A-CI) similar to 17.5 kDa class I heat shock protein SP:P04793 from [Glycine max]             | 5.731          |
| 262518_at     | <a href="#">AT1G17170</a> | glutathione S-transferase, putative One of three repeated putative glutathione transferases. 72% identical to glutathione transferase     | 5.681          |
| 250296_at     | <a href="#">AT5G12020</a> | 17.6 kDa class II heat shock protein (HSP17.6-CII) identical to 17.6 kDa class II heat shock protein SP:P29830 from [Arabidopsis          | 5.628          |
| 261892_at     | <a href="#">AT1G80840</a> | WRKY family transcription factor similar to WRKY transcription factor GB:BAA87058 GI:6472585 from [Nicotiana tabacum]                     | 5.55           |
| 263182_at     | <a href="#">AT1G05575</a> | expressed protein                                                                                                                         | 5.397          |
| 266294_at     | <a href="#">AT2G29500</a> | 17.6 kDa class I small heat shock protein (HSP17.6B-CI) contains Pfam PF00011: Hsp20/alpha crystallin family; identified in Scharf, K     | 5.376          |
| 261648_at     | <a href="#">AT1G27730</a> | zinc finger (C2H2 type) family protein (ZAT10) / salt-tolerance zinc finger protein (STZ) identical to salt-tolerance zinc finger protein | 5.32           |
| 247949_at     | <a href="#">AT5G57220</a> | cytochrome P450, putative similar to Cytochrome P450 (SP:O65790) [Arabidopsis thaliana]; Cytochrome P450                                  | 5.316          |
| 250781_at     | <a href="#">AT5G05410</a> | DRE-binding protein (DREB2A) identical to DREB2A GI:3738230 from [Arabidopsis thaliana] ; supported by                                    | 5.007          |
| 255284_at     | <a href="#">AT4G04610</a> | 5'-adenylylsulfate reductase (APR1) / PAPS reductase homolog (PRH19) identical to 5'-adenylylsulfate reductase [Arabidopsis               | 4.888          |
| 260978_at     | <a href="#">AT1G53540</a> | 17.6 kDa class I small heat shock protein (HSP17.6C-CI) (AA 1-156) identical to (17.6 kDa class I heat shock protein (HSP 17.6)           | 4.877          |
| 265499_at     | <a href="#">AT2G15480</a> | UDP-glucuronosyl/UDP-glucosyl transferase family protein contains Pfam profile: PF00201 UDP-glucuronosyl and UDP-glucosyl                 | 4.818          |
| 263150_at     | <a href="#">AT1G54050</a> | 17.4 kDa class III heat shock protein (HSP17.4-CIII) contains Pfam profile: PF00011 Hsp20/alpha crystallin family; identified as class    | 4.8            |
| 258133_at     | <a href="#">AT3G24500</a> | ethylene-responsive transcriptional coactivator, putative similar to ethylene-responsive transcriptional coactivator [Lycopersicon        | 4.774          |
| 259875_s_at   | <a href="#">AT1G76690</a> | [AT1G76690, 12-oxophytodienoate reductase (OPR2) identical to 12-oxophytodienoate reductase OPR2 GB:AAC78441 [Arabidopsis                 | 4.774          |
| 248332_at     | <a href="#">AT5G52640</a> | heat shock protein 81-1 (HSP81-1) / heat shock protein 83 (HSP83) nearly identical to SP P27323 Heat shock protein 81-1 (HSP81-1)         | 4.763          |
| 261838_at     | <a href="#">AT1G16030</a> | heat shock protein 70, putative / HSP70, putative similar to heat shock protein hsp70 GI:1771478 from [Pisum sativum]                     | 4.734          |
| 261450_s_at   | <a href="#">AT1G21120</a> | [AT1G21120, O-methyltransferase, putative similar to GI:2781394];[AT1G21110, O-methyltransferase, putative similar to                     | 4.692          |
| 266590_at     | <a href="#">AT2G46240</a> | IQ domain-containing protein / BAG domain-containing protein contains Pfam profiles PF00612: IQ calmodulin-binding motif,                 | 4.667          |
| 253046_at     | <a href="#">AT4G37370</a> | cytochrome P450, putative similar to Cytochrome P450 91A1 (SP:Q9FG65) [Arabidopsis thaliana]; cytochrome P450, Glycyrrhiza                | 4.618          |
| 259479_at     | <a href="#">AT1G19020</a> | expressed protein                                                                                                                         | 4.585          |

|             |                           |                                                                                                                                                                                                                                                              |       |
|-------------|---------------------------|--------------------------------------------------------------------------------------------------------------------------------------------------------------------------------------------------------------------------------------------------------------|-------|
| 256245_at   | <a href="#">AT3G12580</a> | heat shock protein 70, putative / HSP70, putative strong similarity to heat shock protein GI:425194 [ <i>Spinacia oleracea</i> ]                                                                                                                             | 4.487 |
| 262517_at   | <a href="#">AT1G17180</a> | glutathione S-transferase, putative Second of three repeated putative glutathione transferases. 72% identical to glutathione heat shock protein 101 (HSP101) identical to heat shock protein 101 GI:6715468 GB:AAF26423 from [ <i>Arabidopsis thaliana</i> ] | 4.423 |
| 260248_at   | <a href="#">AT1G74310</a> | 23.5 kDa mitochondrial small heat shock protein (HSP23.5-M)                                                                                                                                                                                                  | 4.388 |
| 248434_at   | <a href="#">AT5G51440</a> | similar to heat shock 22 kDa protein, mitochondrial precursor ethylene-responsive element-binding protein, putative similar to SP O80341 Ethylene responsive element binding factor 5 (AtERF5)                                                               | 4.371 |
| 245250_at   | <a href="#">AT4G17490</a> | 17.7 kDa class II heat shock protein 17.6A (HSP17.7-CII) identical to heat shock protein 17.6A GI:3256075 from [ <i>Arabidopsis thaliana</i> ]                                                                                                               | 4.37  |
| 250351_at   | <a href="#">AT5G12030</a> | peptidyl-prolyl cis-trans isomerase, putative / FK506-binding protein, putative similar to rof1 [ <i>Arabidopsis thaliana</i> ] GI:1373396                                                                                                                   | 4.319 |
| 248657_at   | <a href="#">AT5G48570</a> | auxin-responsive family protein similar to auxin-induced protein AIR12 GI:11357190 [ <i>Arabidopsis thaliana</i> ]                                                                                                                                           | 4.303 |
| 249719_at   | <a href="#">AT5G35735</a> | zinc finger (C2H2 type) family protein contains Pfam domain, PF00096: Zinc finger, C2H2 type                                                                                                                                                                 | 4.279 |
| 245711_at   | <a href="#">AT5G04340</a> | [AT3G46230, 17.4 kDa class I heat shock protein (HSP17.4-CI) identical to 17.4 kDa class I heat shock protein SP:P19036 from armadillo/beta-catenin repeat family protein contains Pfam profile: PF00514 armadillo/beta-catenin-like repeat                  | 4.23  |
| 252515_at   | <a href="#">AT3G46230</a> | 5'-adenylylsulfate reductase (APR3) / PAPS reductase homolog (PRH26) identical to 5'-adenylylsulfate reductase [ <i>Arabidopsis</i>                                                                                                                          | 4.207 |
| 259037_at   | <a href="#">AT3G09350</a> |                                                                                                                                                                                                                                                              | 4.166 |
| 254343_at   | <a href="#">AT4G21990</a> |                                                                                                                                                                                                                                                              | 4.114 |
| 261449_at   | <a href="#">AT1G21120</a> | O-methyltransferase, putative similar to GI:2781394                                                                                                                                                                                                          | 4.083 |
| 245041_at   | <a href="#">AT2G26530</a> | expressed protein                                                                                                                                                                                                                                            | 4.08  |
| 250182_at   | <a href="#">AT5G14470</a> | GHMP kinase-related contains similarity to D-glycero-D-manno-heptose 7-phosphate kinase [ <i>Aneurinibacillus thermoaerophilus</i> ]                                                                                                                         | 4.042 |
| 255543_at   | <a href="#">AT4G01870</a> | tolB protein-related contains weak similarity to TolB protein precursor (Swiss-Prot:P44677) [ <i>Haemophilus influenzae</i> ]                                                                                                                                | 4.029 |
| 266800_at   | <a href="#">AT2G22880</a> | [AT2G22880, VQ motif-containing protein contains PF05678: VQ motif];[AT2G22870, expressed protein]                                                                                                                                                           | 3.945 |
| 256589_at   | <a href="#">AT3G28730</a> | [AT3G28730, structure-specific recognition protein 1 / high mobility group protein / HMG protein nearly identical to SP Q05153                                                                                                                               | 3.934 |
| 254331_s_at | <a href="#">AT4G22710</a> | [AT4G22710, cytochrome P450 family protein contains Pfam profile: PF00067 cytochrome p450];[AT4G22690, cytochrome P450 serine O-acetyltransferase, putative identical to GI:608677 from [ <i>Arabidopsis thaliana</i> ]                                      | 3.909 |
| 260602_at   | <a href="#">AT1G55920</a> | FAD-binding domain-containing protein similar to SP P30986                                                                                                                                                                                                   | 3.905 |
| 261021_at   | <a href="#">AT1G26380</a> | reticuline oxidase precursor (Berberine-bridge-forming enzyme) hydrolase, alpha/beta fold family protein contains Pfam profile PF00561: hydrolase, alpha/beta fold family                                                                                    | 3.857 |
| 254204_at   | <a href="#">AT4G24160</a> | legume lectin family protein contains Pfam domain, PF00139: Legume lectins beta domain                                                                                                                                                                       | 3.797 |
| 257206_at   | <a href="#">AT3G16530</a> |                                                                                                                                                                                                                                                              | 3.794 |

|             |                           |                                                                                                                                                                                                             |       |
|-------------|---------------------------|-------------------------------------------------------------------------------------------------------------------------------------------------------------------------------------------------------------|-------|
| 267028_at   | <a href="#">AT2G38470</a> | WRKY family transcription factor contains Pfam profile: PF03106<br>WRKY DNA -binding domain;                                                                                                                | 3.793 |
| 248381_at   | <a href="#">AT5G51830</a> | pfkB-type carbohydrate kinase family protein contains Pfam profile:<br>PF00294 pfkB family carbohydrate kinase                                                                                              | 3.704 |
| 247351_at   | <a href="#">AT5G63790</a> | no apical meristem (NAM) family protein contains Pfam PF02365:<br>No apical meristem (NAM) domain; contains similarity to NAC-<br>leucine-rich repeat family protein / protein kinase family protein        | 3.68  |
| 246858_at   | <a href="#">AT5G25930</a> | contains similarity to Swiss-Prot:P47735 receptor-like protein                                                                                                                                              | 3.571 |
| 259979_at   | <a href="#">AT1G76600</a> | expressed protein                                                                                                                                                                                           | 3.558 |
| 256576_at   | <a href="#">AT3G28210</a> | zinc finger (AN1-like) family protein contains Pfam profile: PF01428<br>AN1-like zinc finger                                                                                                                | 3.552 |
| 260406_at   | <a href="#">AT1G69920</a> | glutathione S-transferase, putative similar to glutathione transferase<br>GB:CAA09188 [ <i>Alopecurus myosuroides</i> ]; supported by cDNA                                                                  | 3.53  |
| 254120_at   | <a href="#">AT4G24570</a> | mitochondrial substrate carrier family protein contains Pfam profile:<br>PF00153 mitochondrial carrier protein                                                                                              | 3.509 |
| 266296_at   | <a href="#">AT2G29420</a> | glutathione S-transferase, putative                                                                                                                                                                         | 3.497 |
| 262381_at   | <a href="#">AT1G72900</a> | disease resistance protein (TIR-NBS class), putative domain<br>signature TIR-NBS exists, suggestive of a disease resistance                                                                                 | 3.488 |
| 264758_at   | <a href="#">AT1G61340</a> | F-box family protein contains Pfam PF00646: F-box domain; similar<br>to late embryogenesis abundant protein GI:1350540 from [ <i>Picea</i><br>1-aminocyclopropane-1-carboxylate synthase 6 / ACC synthase 6 | 3.469 |
| 254926_at   | <a href="#">AT4G11280</a> | (ACS6) identical to GI:3746125                                                                                                                                                                              | 3.401 |
| 246744_at   | <a href="#">AT5G27760</a> | hypoxia-responsive family protein contains Pfam profile: PF04588<br>hypoxia induced protein conserved region                                                                                                | 3.387 |
| 246018_at   | <a href="#">AT5G10695</a> | expressed protein                                                                                                                                                                                           | 3.325 |
| 245038_at   | <a href="#">AT2G26560</a> | patatin, putative similar to patatin-like latex allergen [ <i>Hevea</i><br><i>brasiliensis</i> ][PMID:10589016]; contains patatin domain PF01734                                                            | 3.315 |
| 246270_at   | <a href="#">AT4G36500</a> | expressed protein                                                                                                                                                                                           | 3.29  |
| 249575_at   | <a href="#">AT5G37670</a> | 15.7 kDa class I-related small heat shock protein-like (HSP15.7-CI)<br>contains Pfam profile: PF00011 Hsp20/alpha crystallin family;                                                                        | 3.267 |
| 263374_at   | <a href="#">AT2G20560</a> | DNAJ heat shock family protein SP Q9UDY4 DnaJ homolog<br>subfamily B member 4 (Heat shock 40 kDa protein 1 homolog)                                                                                         | 3.254 |
| 265075_at   | <a href="#">AT1G55450</a> | embryo-abundant protein-related similar to embryo-abundant<br>protein GI:1350531 from [ <i>Picea glauca</i> ]                                                                                               | 3.227 |
| 257536_at   | <a href="#">AT3G02800</a> | tyrosine specific protein phosphatase family protein contains<br>tyrosine specific protein phosphatases active site,                                                                                        | 3.221 |
| 246584_at   | <a href="#">AT5G14730</a> | expressed protein                                                                                                                                                                                           | 3.196 |
| 262119_s_at | <a href="#">AT1G02920</a> | [AT1G02920, glutathione S-transferase, putative similar to<br>glutathione S-transferase GI:860955 from [ <i>Hyoscyamus muticus</i> ];<br>ethylene-responsive element-binding protein 1 (ERF1) / EREBP-2     | 3.196 |
| 245252_at   | <a href="#">AT4G17500</a> | protein identical to SP O80337 Ethylene responsive element                                                                                                                                                  | 3.185 |

|             |                           |                                                                                                                                           |       |
|-------------|---------------------------|-------------------------------------------------------------------------------------------------------------------------------------------|-------|
| 251745_at   | <a href="#">AT3G55980</a> | zinc finger (CCCH-type) family protein contains Pfam domain, PF00642: Zinc finger C-x8-C-x5-C-x3-H type (and similar) and                 | 3.179 |
| 256442_at   | <a href="#">AT3G10930</a> | expressed protein                                                                                                                         | 3.148 |
| 263475_at   | <a href="#">AT2G31945</a> | expressed protein                                                                                                                         | 3.137 |
| 260411_at   | <a href="#">AT1G69890</a> | expressed protein contains Pfam profile: PF04601 protein of unknown function (DUF569)                                                     | 3.13  |
| 262656_at   | <a href="#">AT1G14200</a> | zinc finger (C3HC4-type RING finger) family protein contains Pfam profile: PF00097 zinc finger, C3HC4 type (RING finger)                  | 3.125 |
| 254256_at   | <a href="#">AT4G23180</a> | receptor-like protein kinase 4, putative (RLK4) nearly identical to receptor-like protein kinase 4 [Arabidopsis thaliana] GI:13506745;    | 3.102 |
| 260025_at   | <a href="#">AT1G30070</a> | SGS domain-containing protein similar to calcyclin binding protein [Mus musculus] GI:3142331; contains Pfam profile PF05002: SGS          | 3.048 |
| 265501_at   | <a href="#">AT2G15490</a> | UDP-glucuronosyl/UDP-glucosyl transferase family protein contains Pfam profile: PF00201 UDP-glucuronosyl and UDP-glucosyl                 | 3.026 |
| 253268_s_at | <a href="#">AT4G34135</a> | UDP-glucuronosyl/UDP-glucosyl transferase family protein contains Pfam profile: PF00201 UDP-glucuronosyl and UDP-glucosyl                 | 3.022 |
| 259705_at   | <a href="#">AT1G77450</a> | no apical meristem (NAM) family protein contains Pfam PF02365: No apical meristem (NAM) domain; similar to GRAB1 protein                  | 3.001 |
| 262571_at   | <a href="#">AT1G15430</a> | expressed protein                                                                                                                         | 2.999 |
| 267083_at   | <a href="#">AT2G41100</a> | touch-responsive protein / calmodulin-related protein 3, touch-induced (TCH3) identical to calmodulin-related protein 3, touch-           | 2.994 |
| 263231_at   | <a href="#">AT1G05680</a> | UDP-glucuronosyl/UDP-glucosyl transferase family protein contains Pfam profile: PF00201 UDP-glucuronosyl and UDP-glucosyl                 | 2.992 |
| 253915_at   | <a href="#">AT4G27280</a> | calcium-binding EF hand family protein similar to EF-hand Ca <sup>2+</sup> -binding protein CCD1 [Triticum aestivum] GI:9255753; contains | 2.988 |
| 266010_at   | <a href="#">AT2G37430</a> | zinc finger (C2H2 type) family protein (ZAT11) contains Pfam domain, PF00096: Zinc finger, C2H2 type                                      | 2.987 |
| 261459_at   | <a href="#">AT1G21100</a> | [AT1G21100, O-methyltransferase, putative similar to GI:2781394];[AT1G21130, O-methyltransferase, putative similar to                     | 2.974 |
| 250449_at   | <a href="#">AT5G10830</a> | embryo-abundant protein-related similar to embryo-abundant protein [Picea glauca] GI:1350531                                              | 2.961 |
| 254605_at   | <a href="#">AT4G18950</a> | ankyrin protein kinase, putative similar to ankyrin-kinase [Medicago truncatula] gi 18700701 gb AAL78674                                  | 2.945 |
| 263184_at   | <a href="#">AT1G05560</a> | UDP-glucose transferase (UGT75B2) similar to UDP-glucose:indole-3-acetate beta-D-glucosyltransferase GI:2149127                           | 2.884 |
| 259445_at   | <a href="#">AT1G02400</a> | gibberellin 2-oxidase, putative / GA2-oxidase, putative similar to GA2ox2 [GI:4678368]; similar to dioxygenase GI:1666096 from            | 2.879 |
| 246631_at   | <a href="#">AT1G50740</a> | expressed protein contains Pfam profile PF03647: Uncharacterised protein family (UPF0136)                                                 | 2.878 |
| 267357_at   | <a href="#">AT2G40000</a> | expressed protein                                                                                                                         | 2.878 |
| 253643_at   | <a href="#">AT4G29780</a> | expressed protein                                                                                                                         | 2.867 |

|           |                           |                                                                                                                                                                                                        |       |
|-----------|---------------------------|--------------------------------------------------------------------------------------------------------------------------------------------------------------------------------------------------------|-------|
| 246777_at | <a href="#">AT5G27420</a> | zinc finger (C3HC4-type RING finger) family protein similar to RING-H2 zinc finger protein ATL6 [Arabidopsis thaliana]                                                                                 | 2.865 |
| 251774_at | <a href="#">AT3G55830</a> | [AT3G55830, glycosyltransferase family protein 47 similar to exostose-related protein 2, Homo sapiens, PIR:JC5935                                                                                      | 2.865 |
| 254432_at | <a href="#">AT4G20830</a> | FAD-binding domain-containing protein similar to SPIP30986 reticuline oxidase precursor (Berberine-bridge-forming enzyme)                                                                              | 2.865 |
| 249752_at | <a href="#">AT5G24660</a> | expressed protein                                                                                                                                                                                      | 2.862 |
| 248164_at | <a href="#">AT5G54490</a> | calcium-binding EF-hand protein, putative similar to EF-hand Ca <sup>2+</sup> -binding protein CCD1 [Triticum aestivum] GI:9255753; contains                                                           | 2.845 |
| 248134_at | <a href="#">AT5G54860</a> | integral membrane transporter family protein contains 10 transmembrane domains; contains Pfam PF03092: BT1 family;                                                                                     | 2.844 |
| 263379_at | <a href="#">AT2G40140</a> | zinc finger (CCCH-type) family protein contains Pfam domain, PF00642: Zinc finger C-x8-C-x5-C-x3-H type (and similar) and                                                                              | 2.834 |
| 263866_at | <a href="#">AT2G36950</a> | heavy-metal-associated domain-containing protein nearly identical to farnesylated protein ATPF2 [GI:4097545] Pfam profile PF00403: phytochelatin synthase 1 (PCS1) identical to phytochelatin synthase | 2.815 |
| 249078_at | <a href="#">AT5G44070</a> | [Arabidopsis thaliana] gi 18254401 gb AAL66747; identical to cDNA polygalacturonase inhibiting protein 1 (PGIP1) identical to                                                                          | 2.757 |
| 250670_at | <a href="#">AT5G06860</a> | polygalacturonase inhibiting protein 1 (PGIP1) [Arabidopsis                                                                                                                                            | 2.748 |
| 263931_at | <a href="#">AT2G36220</a> | expressed protein                                                                                                                                                                                      | 2.724 |
| 248448_at | <a href="#">AT5G51190</a> | AP2 domain-containing transcription factor, putative contains similarity to ethylene responsive element binding factor                                                                                 | 2.717 |
| 264202_at | <a href="#">AT1G22810</a> | AP2 domain-containing transcription factor, putative Contains similarity to transcription factor (TINY) isolog T02O04.22                                                                               | 2.69  |
| 247543_at | <a href="#">AT5G61600</a> | ethylene-responsive element-binding family protein contains similarity to ethylene responsive element binding factor 5 (AtERF5)                                                                        | 2.685 |
| 265675_at | <a href="#">AT2G32120</a> | heat shock protein 70 family protein / HSP70 family protein similar to SPIP22953 Heat shock cognate 70 kDa protein 1 (Hsc70.1)                                                                         | 2.674 |
| 254839_at | <a href="#">AT4G12400</a> | stress-inducible protein, putative similar to sti (stress inducible protein) [Glycine max] GI:872116; contains Pfam profile PF00515                                                                    | 2.672 |
| 258336_at | <a href="#">AT3G16050</a> | stress-responsive protein, putative similar to ethylene-inducible protein HEVER [Hevea brasiliensis] SWISS-PROT:Q39963;                                                                                | 2.663 |
| 253628_at | <a href="#">AT4G30280</a> | [AT4G30280, xyloglucan:xyloglucosyl transferase, putative / xyloglucan endotransglycosylase, putative / endo-xyloglucan                                                                                | 2.659 |
| 252671_at | <a href="#">AT3G44190</a> | pyridine nucleotide-disulphide oxidoreductase family protein low similarity to dihydrolipoamide dehydrogenase from Clostridium                                                                         | 2.654 |
| 254487_at | <a href="#">AT4G20780</a> | calcium-binding protein, putative similar to SPIQ09011 Calcium-binding protein CAST {Solanum tuberosum}; contains                                                                                      | 2.647 |
| 261564_at | <a href="#">AT1G01720</a> | no apical meristem (NAM) family protein contains Pfam PF02365: No apical meristem (NAM) domain; similar to NAC domain protein                                                                          | 2.642 |
| 249494_at | <a href="#">AT5G39050</a> | transferase family protein similar to anthocyanin 5-aromatic acyltransferase from Gentiana triflora GI:4185599, malonyl                                                                                | 2.628 |
| 254549_at | <a href="#">AT4G19880</a> | glutathione S-transferase-related contains weak hit to Pfam profile PF00043: Glutathione S-transferase, C-terminal domain                                                                              | 2.621 |

|             |                           |                                                                                                                                                                                              |       |
|-------------|---------------------------|----------------------------------------------------------------------------------------------------------------------------------------------------------------------------------------------|-------|
| 261023_at   | <a href="#">AT1G12200</a> | flavin-containing monooxygenase family protein / FMO family protein low similarity to FMO2 from Homo sapiens [SP Q99518]; 2-oxoacid-dependent oxidase, putative (DIN11) identical to partial | 2.621 |
| 252265_at   | <a href="#">AT3G49620</a> | cds of 2-oxoacid-dependent oxidase (din11) from GI:10834554                                                                                                                                  | 2.617 |
| 245731_at   | <a href="#">AT1G73500</a> | mitogen-activated protein kinase kinase (MAPKK), putative (MKK9)                                                                                                                             | 2.598 |
| 254211_at   | <a href="#">AT4G23570</a> | mitogen-activated protein kinase kinase (MAPKK) family, phosphatase-related low similarity to phosphoprotein phosphatase [Mus musculus] GI:567040; contains Pfam profiles PF00515: TPR       | 2.598 |
| 255733_at   | <a href="#">AT1G25400</a> | expressed protein similar to unknown protein GI:6714347 from [Arabidopsis thaliana]                                                                                                          | 2.581 |
| 257918_at   | <a href="#">AT3G23230</a> | ethylene-responsive factor, putative similar to EREBP-4 GB:BAA07323 from [Nicotiana tabacum]                                                                                                 | 2.581 |
| 266658_at   | <a href="#">AT2G25735</a> | expressed protein                                                                                                                                                                            | 2.577 |
| 247047_at   | <a href="#">AT5G66650</a> | expressed protein contains Pfam domain, PF04678: Protein of unknown function, DUF607                                                                                                         | 2.571 |
| 253414_at   | <a href="#">AT4G33050</a> | calmodulin-binding family protein contains Pfam profile PF00612: IQ calmodulin-binding motif                                                                                                 | 2.567 |
| 254784_at   | <a href="#">AT4G12720</a> | MutT/nudix family protein similar to SP P53370 Nucleoside diphosphate-linked moiety X motif 6 (Homo sapiens); contains                                                                       | 2.562 |
| 257670_at   | <a href="#">AT3G20340</a> | expressed protein                                                                                                                                                                            | 2.546 |
| 258786_at   | <a href="#">AT3G11820</a> | syntaxin 121 (SYP121) / syntaxin-related protein (SYR1) contains Pfam profiles: PF00804 syntaxin and PF05739: SNARE domain;                                                                  | 2.539 |
| 254318_at   | <a href="#">AT4G22530</a> | embryo-abundant protein-related similar to embryo-abundant protein [Picea glauca] GI:1350531                                                                                                 | 2.514 |
| 254592_at   | <a href="#">AT4G18880</a> | heat shock transcription factor 21 (HSF21) identical to heat shock transcription factor 21 [Arabidopsis thaliana] GI:3399765; contains                                                       | 2.507 |
| 252474_at   | <a href="#">AT3G46620</a> | zinc finger (C3HC4-type RING finger) family protein contains Pfam domain, PF00097: Zinc finger, C3HC4 type (RING finger)                                                                     | 2.505 |
| 256044_at   | <a href="#">AT1G07160</a> | protein phosphatase 2C, putative / PP2C, putative similar to protein phosphatase 2C GI:2582800 from [Medicago sativa]                                                                        | 2.495 |
| 248607_at   | <a href="#">AT5G49480</a> | sodium-inducible calcium-binding protein (ACP1) / sodium-responsive calcium-binding protein (ACP1) identical to NaCl-exocyst subunit EXO70 family protein leucine zipper-containing          | 2.492 |
| 247693_at   | <a href="#">AT5G59730</a> | protein, Lycopersicon esculentum, PIR:S21495 contains Pfam heat shock transcription factor family protein contains Pfam profile:                                                             | 2.489 |
| 266841_at   | <a href="#">AT2G26150</a> | PF00447 HSF-type DNA-binding domain                                                                                                                                                          | 2.489 |
| 265221_s_at | <a href="#">AT2G02010</a> | [AT2G02010, glutamate decarboxylase, putative strong similarity to glutamate decarboxylase isozyme 3 [Nicotiana tabacum]                                                                     | 2.472 |
| 263935_at   | <a href="#">AT2G35930</a> | U-box domain-containing protein similar to immediate-early fungal elicitor protein CMPG1 [Petroselinum crispum] GI:14582200;                                                                 | 2.462 |
| 264314_at   | <a href="#">AT1G70420</a> | expressed protein                                                                                                                                                                            | 2.461 |
| 246099_at   | <a href="#">AT5G20230</a> | plastocyanin-like domain-containing protein                                                                                                                                                  | 2.454 |



|             |                           |                                                                                                                                                                                                |       |
|-------------|---------------------------|------------------------------------------------------------------------------------------------------------------------------------------------------------------------------------------------|-------|
| 250550_at   | <a href="#">AT5G07870</a> | transferase family protein similar to anthranilate N-hydroxycinnamoyl/benzoyltransferase, <i>Dianthus caryophyllus</i>                                                                         | 2.454 |
| 246612_at   | <a href="#">AT5G35320</a> | expressed protein                                                                                                                                                                              | 2.447 |
| 252908_at   | <a href="#">AT4G39670</a> | expressed protein                                                                                                                                                                              | 2.445 |
| 262374_s_at | <a href="#">AT1G72910</a> | [AT1G72910, disease resistance protein (TIR-NBS class), putative domain signature TIR-NBS exists, suggestive of a disease                                                                      | 2.444 |
| 246463_at   | <a href="#">AT5G16970</a> | NADP-dependent oxidoreductase, putative (P1) identical to probable NADP-dependent oxidoreductase P1, zeta-crystallin                                                                           | 2.418 |
| 265200_s_at | <a href="#">AT2G36790</a> | UDP-glucuronosyl/UDP-glucosyl transferase family protein contains Pfam profile: PF00201 UDP-glucuronosyl and UDP-glucosyl                                                                      | 2.414 |
| 254158_at   | <a href="#">AT4G24380</a> | expressed protein contains Pfam profile: PF03959 domain of unknown function (DUF341)                                                                                                           | 2.409 |
| 265670_s_at | <a href="#">AT2G32210</a> | expressed protein                                                                                                                                                                              | 2.409 |
| 248799_at   | <a href="#">AT5G47230</a> | ethylene-responsive element-binding factor 5 (ERF5) identical to SP O80341 Ethylene responsive element binding factor 5 (AtERF5)                                                               | 2.402 |
| 254241_at   | <a href="#">AT4G23190</a> | protein kinase family protein contains Pfam PF00069: Protein kinase domain                                                                                                                     | 2.4   |
| 247708_at   | <a href="#">AT5G59550</a> | zinc finger (C3HC4-type RING finger) family protein contains Pfam domain, PF00097: Zinc finger, C3HC4 type (RING finger)                                                                       | 2.398 |
| 246464_at   | <a href="#">AT5G16990</a> | [AT5G16990, NADP-dependent oxidoreductase, putative strong similarity to probable NADP-dependent oxidoreductase (zeta-                                                                         | 2.396 |
| 253606_at   | <a href="#">AT4G30530</a> | defense-related protein, putative strong similarity to defense-related protein [ <i>Brassica carinata</i> ] GI:14009290; contains Pfam profile                                                 | 2.395 |
| 245254_at   | <a href="#">AT4G14680</a> | sulfate adenyltransferase 3 / ATP-sulfurylase 3 (APS3) identical to ATP sulfurylase (APS3) [ <i>Arabidopsis thaliana</i> ] GI:1575327                                                          | 2.394 |
| 249983_at   | <a href="#">AT5G18470</a> | curculin-like (mannose-binding) lectin family protein contains Pfam profile: PF01453 lectin (probable mannose binding)                                                                         | 2.378 |
| 261748_at   | <a href="#">AT1G76070</a> | expressed protein                                                                                                                                                                              | 2.366 |
| 260401_at   | <a href="#">AT1G69840</a> | band 7 family protein strong similarity to hypersensitive-induced response protein [ <i>Zea mays</i> ] GI:7716466; contains Pfam profile                                                       | 2.355 |
| 258507_at   | <a href="#">AT3G06500</a> | beta-fructofuranosidase, putative / invertase, putative / saccharase, putative / beta-fructosidase, putative similar to neutral invertase                                                      | 2.351 |
| 263800_at   | <a href="#">AT2G24600</a> | ankyrin repeat family protein contains ankyrin repeats, Pfam:PF00023                                                                                                                           | 2.348 |
| 253535_at   | <a href="#">AT4G31550</a> | WRKY family transcription factor contains Pfam profile: PF03106                                                                                                                                | 2.326 |
| 260126_at   | <a href="#">AT1G36370</a> | WRKY DNA -binding domain                                                                                                                                                                       | 2.325 |
| 259879_at   | <a href="#">AT1G76650</a> | glycine hydroxymethyltransferase, putative / serine hydroxymethyltransferase, putative / serine/threonine aldolase, calcium-binding EF hand family protein similar to regulator of gene        | 2.322 |
| 260405_at   | <a href="#">AT1G69930</a> | silencing calmodulin-related protein GI:12963415 from [ <i>Nicotiana glutathione S-transferase</i> , putative similar to glutathione transferase GB:CAA09188 [ <i>Alopecurus myosuroides</i> ] | 2.319 |

|           |                           |                                                                                                                                      |       |
|-----------|---------------------------|--------------------------------------------------------------------------------------------------------------------------------------|-------|
| 254408_at | <a href="#">AT4G21390</a> | S-locus lectin protein kinase family protein contains Pfam profiles: PF00954 S-locus glycoprotein family, PF00069 protein kinase     | 2.308 |
| 248686_at | <a href="#">AT5G48540</a> | 33 kDa secretory protein-related contains Pfam PF01657: Domain of unknown function, duplicated in 33 KDa secretory proteins          | 2.305 |
| 246034_at | <a href="#">AT5G08350</a> | GRAM domain-containing protein / ABA-responsive protein-related contains similarity to ABA-responsive protein in barley (GI:4103635) | 2.299 |
| 266983_at | <a href="#">AT2G39400</a> | hydrolase, alpha/beta fold family protein similar to monoglyceride lipase from [Homo sapiens] GI:14594904, [Mus musculus]            | 2.296 |
| 253827_at | <a href="#">AT4G28085</a> | expressed protein                                                                                                                    | 2.294 |
| 249417_at | <a href="#">AT5G39670</a> | [AT5G39670, calcium-binding EF hand family protein contains INTERPRO:IPR002048 calcium-binding EF-hand                               | 2.293 |
| 253284_at | <a href="#">AT4G34150</a> | C2 domain-containing protein similar to calcium-dependent protein kinase [Dunaliella tertiolecta] GI:6644464; contains Pfam profile  | 2.283 |
| 252592_at | <a href="#">AT3G45640</a> | mitogen-activated protein kinase, putative / MAPK, putative (MPK3) identical to mitogen-activated protein kinase homolog             | 2.281 |
| 266737_at | <a href="#">AT2G47140</a> | short-chain dehydrogenase/reductase (SDR) family protein similar to 3-beta-hydroxysteroiddehydrogenase GI:15983819 from [Digitalis   | 2.277 |
| 245765_at | <a href="#">AT1G33600</a> | leucine-rich repeat family protein contains leucine rich-repeat (LRR) domains Pfam:PF00560, INTERPRO:IPR001611; contains             | 2.275 |
| 252278_at | <a href="#">AT3G49530</a> | no apical meristem (NAM) family protein contains Pfam PF02365: No apical meristem (NAM) domain; similar to NAC2 - Arabidopsis        | 2.272 |
| 253859_at | <a href="#">AT4G27657</a> | expressed protein                                                                                                                    | 2.257 |
| 253664_at | <a href="#">AT4G30210</a> | NADPH-cytochrome p450 reductase, putative / NADPH-ferrihemoprotein reductase, putative similar to NADPH-cytochrome                   | 2.249 |
| 258792_at | <a href="#">AT3G04640</a> | glycine-rich protein predicted proteins, Arabidopsis thaliana transferase family protein similar to anthocyanin 5-aromatic           | 2.244 |
| 247573_at | <a href="#">AT5G61160</a> | acyltransferase from Gentiana triflora GI:4185599, malonyl myb family transcription factor (MYB51) contains PFAM profile:            | 2.239 |
| 255753_at | <a href="#">AT1G18570</a> | PF00249                                                                                                                              | 2.233 |
| 266259_at | <a href="#">AT2G27830</a> | expressed protein                                                                                                                    | 2.225 |
| 254759_at | <a href="#">AT4G13180</a> | short-chain dehydrogenase/reductase (SDR) family protein similar to short-chain type dehydrogenase/reductase SP:Q08632 [Picea        | 2.223 |
| 253332_at | <a href="#">AT4G33420</a> | peroxidase, putative identical to class III peroxidase ATP32 [Arabidopsis thaliana] gi 17530547 gb AAL40837; identical to cDNA       | 2.216 |
| 254042_at | <a href="#">AT4G25810</a> | xyloglucan:xyloglucosyl transferase, putative / xyloglucan endotransglycosylase, putative / endo-xyloglucan transferase,             | 2.194 |
| 264746_at | <a href="#">AT1G62300</a> | WRKY family transcription factor similar to putative DNA-binding protein GI:7268215 from [Arabidopsis thaliana]                      | 2.191 |
| 256835_at | <a href="#">AT3G22890</a> | sulfate adenyltransferase 1 / ATP-sulfurylase 1 (APS1) nearly identical to ATP sulfurylase (APS1) [Arabidopsis thaliana]             | 2.188 |
| 259272_at | <a href="#">AT3G01290</a> | band 7 family protein similar to hypersensitive-induced response protein [Zea mays] GI:7716470; contains Pfam profile PF01145:       | 2.183 |

|             |                           |                                                                                                                                             |       |
|-------------|---------------------------|---------------------------------------------------------------------------------------------------------------------------------------------|-------|
| 260592_at   | <a href="#">AT1G55850</a> | cellulose synthase family protein similar to cellulose synthase catalytic subunit [gi:13925881] from <i>Nicotiana glauca</i> , cellulose    | 2.18  |
| 262072_at   | <a href="#">AT1G59590</a> | expressed protein                                                                                                                           | 2.169 |
| 258606_at   | <a href="#">AT3G02840</a> | [AT3G02840, immediate-early fungal elicitor family protein similar to immediate-early fungal elicitor protein CMPG1 (GI:14582200)           | 2.168 |
| 266368_at   | <a href="#">AT2G41380</a> | embryo-abundant protein-related similar to embryo-abundant protein [ <i>Picea glauca</i> ] GI:1350531                                       | 2.162 |
| 246293_at   | <a href="#">AT3G56710</a> | sigA-binding protein identical to SigA binding protein [ <i>Arabidopsis thaliana</i> ] gi 6980074 gb AAF34713; contains Pfam PF05678: VQ    | 2.161 |
| 257751_at   | <a href="#">AT3G18690</a> | [AT3G18690, VQ motif-containing protein contains PF05678: VQ motif];[AT3G18680, aspartate/glutamate/uridylylate kinase family               | 2.16  |
| 245866_s_at | <a href="#">AT1G57990</a> | [AT1G57990, purine permease-related low similarity to purine permease [ <i>Arabidopsis thaliana</i> ] GI:7620007; contains Pfam profile     | 2.152 |
| 250676_at   | <a href="#">AT5G06320</a> | harpin-induced family protein / HIN1 family protein / harpin-responsive family protein / NDR1/HIN1-like protein 3 similar to                | 2.143 |
| 251884_at   | <a href="#">AT3G54150</a> | embryo-abundant protein-related similar to embryo-abundant protein [ <i>Picea glauca</i> ] GI:1350531                                       | 2.12  |
| 256017_at   | <a href="#">AT1G19180</a> | expressed protein                                                                                                                           | 2.116 |
| 256337_at   | <a href="#">AT1G72060</a> | expressed protein                                                                                                                           | 2.115 |
| 264213_at   | <a href="#">AT1G65390</a> | disease resistance protein (TIR class), putative domain signature TIR exists, suggestive of a disease resistance protein.                   | 2.114 |
| 256453_at   | <a href="#">AT1G75270</a> | dehydroascorbate reductase, putative similar to GI:6939839 from [ <i>Oryza sativa</i> ]                                                     | 2.111 |
| 253485_at   | <a href="#">AT4G31800</a> | WRKY family transcription factor                                                                                                            | 2.108 |
| 245193_at   | <a href="#">AT1G67810</a> | Fe-S metabolism associated domain-containing protein contains Pfam PF02657: Fe-S metabolism associated domain                               | 2.102 |
| 264153_at   | <a href="#">AT1G65390</a> | disease resistance protein (TIR class), putative domain signature TIR exists, suggestive of a disease resistance protein.                   | 2.099 |
| 246532_at   | <a href="#">AT5G15870</a> | glycosyl hydrolase family 81 protein similar to beta-glucan-elicitor receptor GI:1752734 from [ <i>Glycine max</i> ]                        | 2.089 |
| 258436_at   | <a href="#">AT3G16720</a> | zinc finger (C3HC4-type RING finger) family protein contains Pfam domain, PF00097: Zinc finger, C3HC4 type (RING finger)                    | 2.08  |
| 264365_s_at | <a href="#">AT1G03220</a> | [AT1G03220, extracellular dermal glycoprotein, putative / EDGP, putative similar to extracellular dermal glycoprotein EDGP                  | 2.08  |
| 248327_at   | <a href="#">AT5G52750</a> | heavy-metal-associated domain-containing protein Pfam profile PF00403: Heavy-metal-associated domain                                        | 2.077 |
| 247279_at   | <a href="#">AT5G64310</a> | arabinogalactan-protein (AGP1) identical to gi:3883120 gb:AAAC77823                                                                         | 2.075 |
| 251636_at   | <a href="#">AT3G57530</a> | calcium-dependent protein kinase, putative / CDPK, putative similar to calmodulin-domain protein kinase CDPK isoform 7 [ <i>Arabidopsis</i> | 2.074 |
| 246289_at   | <a href="#">AT3G56880</a> | VQ motif-containing protein contains PF05678: VQ motif                                                                                      | 2.07  |

|             |                           |                                                                                                                                                                                                                                                                                                                                                                                                                                      |       |
|-------------|---------------------------|--------------------------------------------------------------------------------------------------------------------------------------------------------------------------------------------------------------------------------------------------------------------------------------------------------------------------------------------------------------------------------------------------------------------------------------|-------|
| 247137_at   | <a href="#">AT5G66210</a> | calcium-dependent protein kinase family protein / CDPK family protein contains Pfam domains, PF00069: Protein kinase domain hydroxyproline-rich glycoprotein family protein common family member:At2g33490 [Arabidopsis thaliana]                                                                                                                                                                                                    | 2.07  |
| 258282_at   | <a href="#">AT3G26910</a> | UDP-glucuronosyl/UDP-glucosyl transferase family protein contains Pfam profile: PF00201 UDP-glucuronosyl and UDP-glucosyl [AT2G31880, leucine-rich repeat transmembrane protein kinase, putative];[AT2G31890, expressed protein]                                                                                                                                                                                                     | 2.064 |
| 255622_at   | <a href="#">AT4G01070</a> | disease resistance protein (TIR-NBS class), putative domain signature TIR-NBS exists, suggestive of a disease resistance EXS family protein / ERD1/XPR1/SYG1 family protein similar to PHO1 protein [Arabidopsis thaliana] GI:20069032; contains Pfam respiratory burst oxidase protein D (RbohD) / NADPH oxidase identical to respiratory burst oxidase protein D from Arabidopsis xyloglucan:xyloglucosyl transferase / xyloglucan | 2.062 |
| 263478_at   | <a href="#">AT2G31880</a> | endotransglycosylase / endo-xyloglucan transferase (TCH4) transporter-related low similarity to organic anion transporter 3 [Rattus norvegicus] GI:5545293; contains Pfam profile PF00083: senescence-associated family protein similar to senescence-associated protein 5 [Hemerocallis hybrid cultivar]                                                                                                                            | 2.06  |
| 256526_at   | <a href="#">AT1G66090</a> | bZIP family transcription factor similar to bZIP transcription factor GI:1769891 from [Arabidopsis thaliana]                                                                                                                                                                                                                                                                                                                         | 2.041 |
| 262649_at   | <a href="#">AT1G14040</a> | expressed protein                                                                                                                                                                                                                                                                                                                                                                                                                    | 2.033 |
| 248719_at   | <a href="#">AT5G47910</a> | lectin protein kinase family protein contains Pfam domains, PF00069: Protein kinase domain, PF00139: Legume lectins beta expressed protein similar to PGPS/D12 [Petunia x hybrida] GI:4105794; contains Pfam profile PF04749: Protein of unknown                                                                                                                                                                                     | 2.029 |
| 247925_at   | <a href="#">AT5G57560</a> | expressed protein                                                                                                                                                                                                                                                                                                                                                                                                                    | 2.025 |
| 262935_at   | <a href="#">AT1G79410</a> | peroxidase, putative identical to peroxidase ATP24a [Arabidopsis thaliana] gi 1890313 emb CAA72484                                                                                                                                                                                                                                                                                                                                   | 2.004 |
| 267293_at   | <a href="#">AT2G23810</a> | [AT5G23490, expressed protein];[AT5G23510, expressed protein] GCN5-related N-acetyltransferase (GNAT) family protein contains Pfam profile PF00583: acetyltransferase, GNAT family                                                                                                                                                                                                                                                   | 1.977 |
| 248606_at   | <a href="#">AT5G49450</a> | expressed protein                                                                                                                                                                                                                                                                                                                                                                                                                    | 1.96  |
| 260656_at   | <a href="#">AT1G19380</a> | expressed protein                                                                                                                                                                                                                                                                                                                                                                                                                    | 1.955 |
| 255502_at   | <a href="#">AT4G02410</a> | expressed protein                                                                                                                                                                                                                                                                                                                                                                                                                    | 1.953 |
| 262832_s_at | <a href="#">AT1G14870</a> | expressed protein                                                                                                                                                                                                                                                                                                                                                                                                                    | 1.948 |
| 251937_at   | <a href="#">AT3G53400</a> | expressed protein                                                                                                                                                                                                                                                                                                                                                                                                                    | 1.947 |
| 249459_at   | <a href="#">AT5G39580</a> | expressed protein                                                                                                                                                                                                                                                                                                                                                                                                                    | 1.939 |
| 249835_s_at | <a href="#">AT5G23490</a> | expressed protein                                                                                                                                                                                                                                                                                                                                                                                                                    | 1.938 |
| 265725_at   | <a href="#">AT2G32030</a> | expressed protein                                                                                                                                                                                                                                                                                                                                                                                                                    | 1.938 |
| 258830_at   | <a href="#">AT3G07090</a> | expressed protein                                                                                                                                                                                                                                                                                                                                                                                                                    | 1.922 |
| 260974_at   | <a href="#">AT1G53430</a> | family protein contains Pfam domains PF00560: Leucine Rich disease resistance protein (TIR-NBS class), putative domain signature TIR-NBS exists, suggestive of a disease resistance ubiquinol-cytochrome C reductase complex 14 kDa protein, putative similar to SP P48502 Ubiquinol-cytochrome C reductase complex                                                                                                                  | 1.916 |
| 262383_at   | <a href="#">AT1G72940</a> | expressed protein                                                                                                                                                                                                                                                                                                                                                                                                                    | 1.911 |
| 246944_at   | <a href="#">AT5G25450</a> | expressed protein                                                                                                                                                                                                                                                                                                                                                                                                                    | 1.898 |
| 249918_at   | <a href="#">AT5G19240</a> | expressed protein                                                                                                                                                                                                                                                                                                                                                                                                                    | 1.885 |

|             |                           |                                                                                                                                                                                                      |       |
|-------------|---------------------------|------------------------------------------------------------------------------------------------------------------------------------------------------------------------------------------------------|-------|
| 265184_at   | <a href="#">AT1G23710</a> | expressed protein                                                                                                                                                                                    | 1.885 |
| 248981_at   | <a href="#">AT5G45110</a> | ankyrin repeat family protein / BTB/POZ domain-containing protein contains Pfam domain, PF00023: Ankyrin repeat and Pfam domain, S-locus lectin protein kinase family protein contains Pfam domains, | 1.881 |
| 264756_at   | <a href="#">AT1G61370</a> | PF00954: S-locus glycoprotein family, PF00069: Protein kinase ubiquitin-conjugating enzyme 3 (UBC3) E2; identical to gi:431261, SP:P42746                                                            | 1.878 |
| 247433_at   | <a href="#">AT5G62540</a> | carbonic anhydrase family protein similar to storage protein (dioscorin) [Dioscorea cayenensis] GI:433463; contains Pfam                                                                             | 1.877 |
| 265572_at   | <a href="#">AT2G28210</a> | PRLI-interacting factor K nearly identical to PRLI-interacting factor K [Arabidopsis thaliana] GI:11139266; contains Pfam profiles                                                                   | 1.875 |
| 245313_at   | <a href="#">AT4G15420</a> | zinc finger (C3HC4-type RING finger) family protein contains Pfam domain, PF00097: Zinc finger, C3HC4 type (RING finger)                                                                             | 1.862 |
| 245369_at   | <a href="#">AT4G15975</a> | U-box domain-containing protein low similarity to immediate-early fungal elicitor protein CMPG1 [Petroselinum crispum] GI:14582200;                                                                  | 1.846 |
| 258787_at   | <a href="#">AT3G11840</a> | calcium-transporting ATPase, plasma membrane-type, putative / Ca(2+)-ATPase, putative (ACA12) identical to SP Q9LY77 Potential                                                                       | 1.846 |
| 251176_at   | <a href="#">AT3G63380</a> |                                                                                                                                                                                                      | 1.833 |
| 247488_at   | <a href="#">AT5G61820</a> | expressed protein MtN19, Medicago truncatula, EMBL:MTY15367                                                                                                                                          | 1.828 |
| 252976_s_at | <a href="#">AT4G38550</a> | expressed protein                                                                                                                                                                                    | 1.828 |
| 251507_at   | <a href="#">AT3G59080</a> | aspartyl protease family protein contains similarity to CND41, chloroplast nucleoid DNA binding protein (GI:2541876) [Nicotiana                                                                      | 1.815 |
| 267451_at   | <a href="#">AT2G33710</a> | AP2 domain-containing transcription factor family protein similar to RAP2.6 (GI:17065542) {Arabidopsis thaliana}                                                                                     | 1.814 |
| 261143_at   | <a href="#">AT1G19770</a> | purine permease-related low similarity to purine permease [Arabidopsis thaliana] GI:7620007; contains Pfam profile PF03151:                                                                          | 1.809 |
| 250054_at   | <a href="#">AT5G17860</a> | cation exchanger, putative (CAX7) contains similarity to SWISS-PROT:Q9HC58 NKX3_HUMAN Sodium/potassium/calcium                                                                                       | 1.803 |
| 264655_at   | <a href="#">AT1G09070</a> | C2 domain-containing protein / src2-like protein, putative similar to cold-regulated gene SRC2 [Glycine max] GI:2055230; contains                                                                    | 1.803 |
| 261718_at   | <a href="#">AT1G18390</a> | protein kinase family protein contains protein kinase domain, Pfam:PF00069                                                                                                                           | 1.801 |
| 262801_at   | <a href="#">AT1G21010</a> | expressed protein                                                                                                                                                                                    | 1.795 |
| 248794_at   | <a href="#">AT5G47220</a> | ethylene-responsive element-binding factor 2 (ERF2) identical to SP O80338 Ethylene responsive element binding factor 2 (AtERF2)                                                                     | 1.793 |
| 250826_at   | <a href="#">AT5G05220</a> | expressed protein                                                                                                                                                                                    | 1.791 |
| 248964_at   | <a href="#">AT5G45340</a> | cytochrome P450 family protein similar to SP Q42569 C901_ARATH Cytochrome P450 90A1 (SP:Q42569)                                                                                                      | 1.784 |
| 265674_at   | <a href="#">AT2G32190</a> | expressed protein                                                                                                                                                                                    | 1.784 |
| 247283_at   | <a href="#">AT5G64250</a> | 2-nitropropane dioxygenase family / NPD family contains Pfam profile PF03060: oxidoreductase, 2-nitropropane dioxygenase                                                                             | 1.779 |

|             |                           |                                                                                                                                      |       |
|-------------|---------------------------|--------------------------------------------------------------------------------------------------------------------------------------|-------|
| 260243_at   | <a href="#">AT1G63720</a> | expressed protein similar to putative protein GB:CAA18164 [Arabidopsis thaliana]                                                     | 1.772 |
| 265199_s_at | <a href="#">AT2G36770</a> | UDP-glucuronosyl/UDP-glucosyl transferase family protein contains Pfam profile: PF00201 UDP-glucuronosyl and UDP-glucosyl            | 1.761 |
| 250990_at   | <a href="#">AT5G02280</a> | [AT5G02280, synbindin, putative similar to Swiss-Prot:Q9ES56 synbindin (TRS23 homolog) [Mus musculus]];[AT5G02290, protein           | 1.758 |
| 261193_at   | <a href="#">AT1G32920</a> | expressed protein                                                                                                                    | 1.758 |
| 261650_at   | <a href="#">AT1G27770</a> | calcium-transporting ATPase 1, plasma membrane-type / Ca(2+)-ATPase isoform 1 (ACA1) / plastid envelope ATPase 1 (PEA1)              | 1.749 |
| 266017_at   | <a href="#">AT2G18690</a> | expressed protein                                                                                                                    | 1.739 |
| 246305_at   | <a href="#">AT3G51890</a> | expressed protein protein At2g40060 - Arabidopsis thaliana, EMBL:AF002109                                                            | 1.736 |
| 251336_at   | <a href="#">AT3G61190</a> | BON1-associated protein 1 (BAP1) identical to BON1-associated protein 1 [Arabidopsis thaliana] GI:15487384; contains Pfam profile    | 1.732 |
| 264745_at   | <a href="#">AT1G62180</a> | 5'-adenylylsulfate reductase 2, chloroplast (APR2) (APSR) / adenosine 5'-phosphosulfate 5'-adenylylsulfate (APS)                     | 1.728 |
| 267623_at   | <a href="#">AT2G39650</a> | expressed protein contains Pfam profile PF04720: Protein of unknown function (DUF506)                                                | 1.723 |
| 265841_at   | <a href="#">AT2G35710</a> | glycogenin glucosyltransferase (glycogenin)-related low similarity to glycogenin-2 from Homo sapiens [SP O15488]                     | 1.721 |
| 247811_at   | <a href="#">AT5G58430</a> | exocyst subunit EXO70 family protein leucine zipper-containing protein, Lycopersicon esculentum, PIR:S21495; contains Pfam           | 1.719 |
| 253630_at   | <a href="#">AT4G30490</a> | AFG1-like ATPase                                                                                                                     | 1.716 |
| 249942_at   | <a href="#">AT5G22300</a> | AFG1-like ATPase nitrilase 4 (NIT4) identical to SP P46011 Nitrilase 4 (EC 3.5.5.1) {Arabidopsis thaliana}                           | 1.713 |
| 264663_at   | <a href="#">AT1G09970</a> | leucine-rich repeat transmembrane protein kinase, putative Similar to A. thaliana receptor-like protein kinase (gb RLK5_ARATH). ESTs | 1.71  |
| 248146_at   | <a href="#">AT5G54940</a> | eukaryotic translation initiation factor SU11, putative similar to SP P32911 Protein translation factor SU11 {Saccharomyces          | 1.708 |
| 251640_at   | <a href="#">AT3G57450</a> | expressed protein                                                                                                                    | 1.708 |
| 248162_at   | <a href="#">AT5G54500</a> | quinone reductase, putative similar to 1,4-benzoquinone reductase [Phanerochaete chrysosporium][GI:4454993]; contains flavodoxin     | 1.703 |
| 264624_at   | <a href="#">AT1G08930</a> | early-responsive to dehydration stress protein (ERD6) / sugar transporter family protein identical to ERD6 protein {Arabidopsis      | 1.701 |
| 256922_at   | <a href="#">AT3G19010</a> | oxidoreductase, 2OG-Fe(II) oxygenase family protein contains similarity to flavonol synthase (FLS) from [Solanum tuberosum]          | 1.689 |
| 265662_at   | <a href="#">AT2G24500</a> | zinc finger (C2H2 type) family protein contains Pfam profile: PF00096 zinc finger, C2H2 type                                         | 1.685 |
| 261526_at   | <a href="#">AT1G14380</a> | [AT1G14380, calmodulin-binding family protein contains Pfam profile PF00612: IQ calmodulin-binding motif];[AT1G14370, protein        | 1.682 |
| 259312_at   | <a href="#">AT3G05200</a> | zinc finger (C3HC4-type RING finger) family protein (ATL6) contains Pfam profile: PF00097: Zinc finger, C3HC4 type (RING             | 1.678 |

|           |                           |                                                                                                                                                                                                 |       |
|-----------|---------------------------|-------------------------------------------------------------------------------------------------------------------------------------------------------------------------------------------------|-------|
| 251428_at | <a href="#">AT3G60140</a> | glycosyl hydrolase family 1 protein contains Pfam PF00232 : Glycosyl hydrolase family 1 domain; TIGRFAM TIGR01233: 6-                                                                           | 1.673 |
| 247293_at | <a href="#">AT5G64510</a> | expressed protein                                                                                                                                                                               | 1.667 |
| 260399_at | <a href="#">AT1G72520</a> | lipoxygenase, putative similar to lipoxygenase gi:1495804 [Solanum tuberosum], gi:1654140 [Lycopersicon esculentum], GB:CAB56692                                                                | 1.665 |
| 266101_at | <a href="#">AT2G37940</a> | expressed protein                                                                                                                                                                               | 1.664 |
| 245788_at | <a href="#">AT1G32120</a> | expressed protein contains Pfam profile PF04819: Family of unknown function (DUF716) (Plant viral-response family)                                                                              | 1.659 |
| 249770_at | <a href="#">AT5G24110</a> | WRKY family transcription factor                                                                                                                                                                | 1.646 |
| 266536_at | <a href="#">AT2G16900</a> | expressed protein                                                                                                                                                                               | 1.636 |
| 259792_at | <a href="#">AT1G29690</a> | expressed protein                                                                                                                                                                               | 1.626 |
| 254694_at | <a href="#">AT4G17900</a> | zinc-binding family protein similar to zinc-binding protein [Pisum sativum] GI:16117799; contains Pfam profile PF04640 : Protein of heavy-metal-associated domain-containing protein similar to | 1.62  |
| 250944_at | <a href="#">AT5G03380</a> | farnesylated protein ATPF2 [GI:4097545]; contains Pfam profile DNAJ heat shock N-terminal domain-containing protein similar to                                                                  | 1.615 |
| 257654_at | <a href="#">AT3G13310</a> | J11 protein [Arabidopsis thaliana] GI:9843641; contains Pfam no apical meristem (NAM) family protein similar to to NAC2                                                                         | 1.614 |
| 258921_at | <a href="#">AT3G10500</a> | (GI:645671) [Arabidopsis thaliana]; contains Pfam PF02365: No cinnamoyl-CoA reductase family similar to cinnamoyl-CoA                                                                           | 1.609 |
| 255787_at | <a href="#">AT2G33590</a> | reductase from Pinus taeda [GI:17978649], Eucalyptus gunnii expressed protein contains Pfam profile: PF04508 viral A-type                                                                       | 1.605 |
| 265679_at | <a href="#">AT2G32240</a> | inclusion protein repeat                                                                                                                                                                        | 1.605 |
| 245051_at | <a href="#">AT2G23320</a> | WRKY family transcription factor identical to WRKY DNA-binding protein 15 GI:13506742 from [Arabidopsis thaliana]                                                                               | 1.6   |
| 261177_at | <a href="#">AT1G04770</a> | male sterility MS5 family protein similar to male sterility MS5 [Arabidopsis thaliana] GI:3859112; contains Pfam profile PF00515                                                                | 1.6   |
| 267076_at | <a href="#">AT2G41090</a> | calmodulin-like calcium-binding protein, 22 kDa (CaBP-22) identical to SP P30187 22 kDa calmodulin-like calcium-binding protein                                                                 | 1.6   |
| 247215_at | <a href="#">AT5G64905</a> | expressed protein                                                                                                                                                                               | 1.597 |
| 250252_at | <a href="#">AT5G13750</a> | transporter-related                                                                                                                                                                             | 1.597 |
| 258682_at | <a href="#">AT3G08720</a> | serine/threonine protein kinase (PK19) identical to serine/threonine-protein kinase AtPK19 (Ribosomal-protein S6 kinase homolog)                                                                | 1.597 |
| 253884_at | <a href="#">AT4G27670</a> | 25.3 kDa small heat shock protein, chloroplast precursor (HSP25.3-P) identical to small heat shock protein, chloroplast precursor                                                               | 1.596 |
| 246108_at | <a href="#">AT5G28630</a> | glycine-rich protein                                                                                                                                                                            | 1.595 |
| 257700_at | <a href="#">AT3G12740</a> | LEM3 (ligand-effect modulator 3) family protein / CDC50 family protein Similar to GI:4585976; GI:4966357; GI:4835763;                                                                           | 1.59  |

|             |                           |                                                                                                                                      |       |
|-------------|---------------------------|--------------------------------------------------------------------------------------------------------------------------------------|-------|
| 245662_at   | <a href="#">AT1G28190</a> | expressed protein                                                                                                                    | 1.582 |
| 249987_at   | <a href="#">AT5G18490</a> | expressed protein                                                                                                                    | 1.581 |
| 266290_at   | <a href="#">AT2G29490</a> | glutathione S-transferase, putative similar to glutathione S-transferase 103-1A [Arabidopsis thaliana] SWISS-PROT:P46421             | 1.581 |
| 258207_at   | <a href="#">AT3G14050</a> | RelA/SpoT protein, putative (RSH2) nearly identical to RelA/SpoT homolog RSH2 [Arabidopsis thaliana] GI:7141306; contains Pfam       | 1.58  |
| 256433_at   | <a href="#">AT3G10985</a> | wound-responsive protein-related similar to SP P20144 Wound-induced protein 1 {Solanum tuberosum}                                    | 1.576 |
| 253273_at   | <a href="#">AT4G34180</a> | cyclase family protein contains Pfam profile: PF04199 putative cyclase                                                               | 1.573 |
| 255568_at   | <a href="#">AT4G01250</a> | WRKY family transcription factor contains Pfam profile: PF03106 WRKY DNA -binding domain                                             | 1.571 |
| 253140_at   | <a href="#">AT4G35480</a> | zinc finger (C3HC4-type RING finger) family protein contains Pfam domain PF00097: Zinc finger, C3HC4 type (RING finger)              | 1.566 |
| 265093_at   | <a href="#">AT1G03905</a> | ABC transporter family protein similar to NBD-like protein GB:AAD20643                                                               | 1.562 |
| 255811_at   | <a href="#">AT4G10250</a> | 22.0 kDa ER small heat shock protein (HSP22.0-ER) identical to endomembrane-localized small heat shock protein GI:511795 from        | 1.559 |
| 264299_s_at | <a href="#">AT1G78860</a> | curculin-like (mannose-binding) lectin family protein low similarity to Ser/Thr protein kinase [Zea mays] GI:2598067; contains Pfam  | 1.555 |
| 254200_at   | <a href="#">AT4G24110</a> | expressed protein                                                                                                                    | 1.546 |
| 262085_at   | <a href="#">AT1G56060</a> | expressed protein                                                                                                                    | 1.546 |
| 261081_at   | <a href="#">AT1G07350</a> | transformer serine/arginine-rich ribonucleoprotein, putative similar to GB:Y09506 from [Nicotiana tabacum] (Plant Mol. Biol. 35 (3), | 1.539 |
| 245277_at   | <a href="#">AT4G15550</a> | UDP-glucose:indole-3-acetate beta-D-glucosyltransferase (IAGLU) identical to UDP-glucose:indole-3-acetate beta-D-                    | 1.537 |
| 251342_at   | <a href="#">AT3G60690</a> | auxin-responsive family protein similar to auxin-induced protein SAUR-AC1 (GP:546362) (PIR:T06084)[Arabidopsis thaliana]             | 1.537 |
| 266461_at   | <a href="#">AT2G47730</a> | glutathione S-transferase 6 (GST6) identical to GB:X95295. Based on identical cDNA hits, the translation is now 40 AAs longer at the | 1.535 |
| 261618_at   | <a href="#">AT1G33110</a> | MATE efflux family protein similar to ripening regulated protein DDTFR18 [Lycopersicon esculentum] GI:12231296; contains Pfam        | 1.531 |
| 266888_s_at | <a href="#">AT2G44750</a> | [AT2G44750, thiamin pyrophosphokinase, putative similar to thiamin pyrophosphokinase [Mus musculus]                                  | 1.529 |
| 256756_at   | <a href="#">AT3G25610</a> | haloacid dehalogenase-like hydrolase family protein similar to Potential phospholipid-transporting ATPase (EC 3.6.3.1) from Mus      | 1.527 |
| 260915_at   | <a href="#">AT1G02660</a> | lipase class 3 family protein contains Pfam profile PF01764: Lipase seven transmembrane MLO family protein / MLO-like protein 2      | 1.526 |
| 262455_at   | <a href="#">AT1G11310</a> | (MLO2) identical to membrane protein Mlo2 [Arabidopsis thaliana] cytochrome P450, putative similar to cytochrome P450 89A2           | 1.523 |
| 266155_at   | <a href="#">AT1G64950</a> | (CYPLXXXIX) (SP:Q42602) [Arabidopsis thaliana]; similar to                                                                           | 1.519 |



|             |                           |                                                                                                                                                                                              |       |
|-------------|---------------------------|----------------------------------------------------------------------------------------------------------------------------------------------------------------------------------------------|-------|
| 245768_at   | <a href="#">AT1G33590</a> | disease resistance protein-related / LRR protein-related contains leucine rich-repeat domains Pfam:PF00560,                                                                                  | 1.518 |
| 267389_at   | <a href="#">AT2G44460</a> | glycosyl hydrolase family 1 protein contains Pfam PF00232 : Glycosyl hydrolase family 1 domain; TIGRFAM TIGR01233: 6-integral membrane transporter family protein similar to high affinity   | 1.517 |
| 261344_at   | <a href="#">AT1G79710</a> | folic acid/methotrexate transporter 5 (GI:21898554) [Leishmania pyruvate phosphate dikinase family protein contains Pfam profiles: PF01326 pyruvate phosphate dikinase, PEP/pyruvate binding | 1.514 |
| 245528_at   | <a href="#">AT4G15530</a> |                                                                                                                                                                                              | 1.513 |
| 256518_at   | <a href="#">AT1G66080</a> | expressed protein                                                                                                                                                                            | 1.512 |
| 260362_at   | <a href="#">AT1G70530</a> | protein kinase family protein contains Pfam domain, PF00069: Protein kinase domain                                                                                                           | 1.511 |
| 267392_at   | <a href="#">AT2G44490</a> | glycosyl hydrolase family 1 protein contains Pfam PF00232 : Glycosyl hydrolase family 1 domain; TIGRFAM TIGR01233: 6-riboflavin biosynthesis protein, putative (RIBA) similar to             | 1.509 |
| 247272_at   | <a href="#">AT5G64300</a> | SP P47924 (Arabidopsis thaliana), SP P51695 Riboflavin armadillo/beta-catenin repeat family protein / U-box domain-                                                                          | 1.508 |
| 251061_at   | <a href="#">AT5G01830</a> | containing protein contains Pfam domain, PF00514: Armadillo/beta-                                                                                                                            | 1.503 |
| 254050_s_at | <a href="#">AT4G25690</a> | [AT4G25690, expressed protein];[AT4G25670, expressed protein]                                                                                                                                | 1.503 |
| 252193_at   | <a href="#">AT3G50060</a> | myb family transcription factor contains Pfam profile: PF00249 myb-like DNA-binding domain; identical to cDNA MYB-related protein                                                            | 1.499 |
| 252679_at   | <a href="#">AT3G44260</a> | CCR4-NOT transcription complex protein, putative similar to SWISS-PROT:Q9UFF9 CCR4-NOT transcription complex, subunit                                                                        | 1.496 |
| 264400_at   | <a href="#">AT1G61800</a> | glucose-6-phosphate/phosphate translocator, putative similar to glucose-6-phosphate/phosphate-translocator precursor GI:2997591                                                              | 1.493 |
| 261265_at   | <a href="#">AT1G26800</a> | zinc finger (C3HC4-type RING finger) family protein contains Pfam profile: PF00097 zinc finger, C3HC4 type (RING finger)                                                                     | 1.49  |
| 262772_at   | <a href="#">AT1G13210</a> | haloacid dehalogenase-like hydrolase family protein similar to Potential phospholipid-transporting ATPase (EC 3.6.3.1)                                                                       | 1.486 |
| 256046_at   | <a href="#">AT1G07130</a> | OB-fold nucleic acid binding domain-containing protein contains InterPro entry IPR004365: OB-fold nucleic acid binding domain                                                                | 1.485 |
| 256454_at   | <a href="#">AT1G75280</a> | isoflavone reductase, putative identical to SP P52577 Isoflavone reductase homolog P3 (EC 1.3.1.-) (Arabidopsis thaliana); contains                                                          | 1.484 |
| 263823_s_at | <a href="#">AT2G40350</a> | AP2 domain-containing transcription factor, putative (DREB2) similar to DREB2A (GP:3738230) and DREB2B (GP:3738232)                                                                          | 1.48  |
| 247679_at   | <a href="#">AT5G59540</a> | oxidoreductase, 2OG-Fe(II) oxygenase family protein similar to desacetoxylvindoline-4-hydroxylase [Catharanthus roseus]                                                                      | 1.479 |
| 255904_at   | <a href="#">AT1G17860</a> | trypsin and protease inhibitor family protein / Kunitz family protein similar to LeMir (miraculin homolog) GI:2654440 from                                                                   | 1.477 |
| 256999_at   | <a href="#">AT3G14200</a> | DNAJ heat shock N-terminal domain-containing protein low similarity to SP O75190 DJB6_HUMAN DnaJ homolog subfamily B                                                                         | 1.477 |
| 256522_at   | <a href="#">AT1G66160</a> | U-box domain-containing protein similar to immediate-early fungal elicitor protein CMPG1 [Petroselinum crispum] GI:14582200;                                                                 | 1.476 |
| 250289_at   | <a href="#">AT5G13190</a> | expressed protein                                                                                                                                                                            | 1.473 |

|             |                           |                                                                                                                                                                                         |       |
|-------------|---------------------------|-----------------------------------------------------------------------------------------------------------------------------------------------------------------------------------------|-------|
| 266299_at   | <a href="#">AT2G29450</a> | glutathione S-transferase (103-1A) identical to Swiss-Prot:P46421                                                                                                                       | 1.471 |
| 257784_at   | <a href="#">AT3G26980</a> | glutathione S-transferase 103-1A [Arabidopsis thaliana]<br>ubiquitin family protein contains INTERPRO:IPR000626 ubiquitin domain                                                        | 1.468 |
| 264986_at   | <a href="#">AT1G27130</a> | glutathione S-transferase, putative similar to glutathione S-transferase GB: AAF22517 GI:6652870 from [Papaver somniferum]                                                              | 1.46  |
| 256050_at   | <a href="#">AT1G07000</a> | exocyst subunit EXO70 family protein similar to leucine zipper protein GI:10177020 from [Arabidopsis thaliana] contains Pfam                                                            | 1.455 |
| 258984_at   | <a href="#">AT3G08970</a> | DNAJ heat shock N-terminal domain-containing protein low similarity to PIR A47079 A47079 heat shock protein dnaJ -                                                                      | 1.455 |
| 261719_at   | <a href="#">AT1G18380</a> | expressed protein                                                                                                                                                                       | 1.455 |
| 262899_at   | <a href="#">AT1G59870</a> | ABC transporter family protein similar to PDR5-like ABC transporter GI:1514643 from [Spirodela polyrhiza]                                                                               | 1.448 |
| 257216_at   | <a href="#">AT3G14990</a> | 4-methyl-5(b-hydroxyethyl)-thiazole monophosphate biosynthesis protein, putative supporting cDNA gj 11908017 gb AF326856.1]; alternative oxidase 1a, mitochondrial (AOX1A) identical to | 1.445 |
| 258452_at   | <a href="#">AT3G22370</a> | GB:Q39219 [SP Q39219] from [Arabidopsis thaliana]                                                                                                                                       | 1.443 |
| 255039_at   | <a href="#">AT4G09570</a> | calcium-dependent protein kinase, putative / CDPK, putative similar to calcium-dependent protein kinase [Arabidopsis thaliana]                                                          | 1.44  |
| 264645_at   | <a href="#">AT1G08940</a> | phosphoglycerate/bisphosphoglycerate mutase family protein contains Pfam profile PF00300: phosphoglycerate mutase family                                                                | 1.439 |
| 254396_at   | <a href="#">AT4G21680</a> | proton-dependent oligopeptide transport (POT) family protein contains Pfam profile: PF00854 POT family                                                                                  | 1.438 |
| 261453_at   | <a href="#">AT1G21130</a> | O-methyltransferase, putative similar to GI:2781394                                                                                                                                     | 1.435 |
| 260522_x_at | <a href="#">AT2G41730</a> | expressed protein                                                                                                                                                                       | 1.432 |
| 253061_at   | <a href="#">AT4G37610</a> | TAZ zinc finger family protein / BTB/POZ domain-containing protein contains Pfam PF00651 : BTB/POZ domain; contains Pfam                                                                | 1.426 |
| 266168_at   | <a href="#">AT2G38870</a> | protease inhibitor, putative similar to SP P24076 Glu S.griseus protease inhibitor (BGIA) {Momordica charantia}; contains Pfam                                                          | 1.423 |
| 259297_at   | <a href="#">AT3G05360</a> | disease resistance family protein / LRR family protein contains leucine rich-repeat domains Pfam:PF00560,                                                                               | 1.419 |
| 245777_at   | <a href="#">AT1G73540</a> | MutT/nudix family protein low similarity to SP Q09790 Diadenosine 5',5''-P1,P6-hexaphosphate hydrolase (EC 3.6.1.-) (Ap6A                                                               | 1.417 |
| 253453_at   | <a href="#">AT4G31860</a> | protein phosphatase 2C, putative / PP2C, putative protein phosphatase 2C, Schizosaccharomyces pombe, PIR2:S54297                                                                        | 1.412 |
| 255524_at   | <a href="#">AT4G02330</a> | pectinesterase family protein contains Pfam profile: PF01095 pectinesterase                                                                                                             | 1.41  |
| 262325_at   | <a href="#">AT1G64160</a> | disease resistance-responsive family protein / dirigent family protein similar to dirigent protein GB:AAF25365 GI:6694709 from [Thuja                                                   | 1.41  |
| 258395_at   | <a href="#">AT3G15500</a> | no apical meristem (NAM) family protein (NAC3) identical to AtNAC3 [Arabidopsis thaliana] GI:12060424; contains Pfam                                                                    | 1.409 |
| 258100_at   | <a href="#">AT3G23550</a> | [AT3G23550, MATE efflux family protein similar to ripening regulated protein DDTFR18 [Lycopersicon esculentum]                                                                          | 1.408 |

|             |                           |                                                                       |       |
|-------------|---------------------------|-----------------------------------------------------------------------|-------|
| 249237_at   | <a href="#">AT5G42050</a> | expressed protein similar to gda-1 [Pisum sativum] GI:2765418         | 1.406 |
| 259911_at   | <a href="#">AT1G72680</a> | cinnamyl-alcohol dehydrogenase, putative similar to cinnamyl-         | 1.406 |
| 262382_at   | <a href="#">AT1G72920</a> | alcohol dehydrogenase GB:AAC35846 [Medicago sativa],                  | 1.406 |
| 263221_at   | <a href="#">AT1G30620</a> | disease resistance protein (TIR-NBS class), putative domain           | 1.406 |
| 258939_at   | <a href="#">AT3G10020</a> | signature TIR-NBS exists, suggestive of a disease resistance          | 1.404 |
| 261445_at   | <a href="#">AT1G28380</a> | UDP-D-xylose 4-epimerase, putative (MUR4) similar to SP P55180        | 1.403 |
| 260477_at   | <a href="#">AT1G11050</a> | UDP-glucose 4-epimerase (EC 5.1.3.2) from Bacillus subtilis,          | 1.402 |
| 264107_s_at | <a href="#">AT2G13800</a> | expressed protein                                                     | 1.401 |
| 267336_at   | <a href="#">AT2G19310</a> | protein kinase family protein contains protein kinase domain,         | 1.401 |
| 252131_at   | <a href="#">AT3G50930</a> | Pfam:PF00069                                                          | 1.391 |
| 245757_at   | <a href="#">AT1G35140</a> | [AT2G13800, leucine-rich repeat family protein / protein kinase       | 1.39  |
| 249984_at   | <a href="#">AT5G18400</a> | family protein contains Pfam domains PF00560: Leucine Rich            | 1.388 |
| 267280_at   | <a href="#">AT2G19450</a> | expressed protein                                                     | 1.381 |
| 254059_at   | <a href="#">AT4G25200</a> | AAA-type ATPase family protein contains Pfam profile: ATPase          | 1.376 |
| 261934_at   | <a href="#">AT1G22400</a> | family PF00004                                                        | 1.373 |
| 248205_at   | <a href="#">AT5G54300</a> | phosphate-responsive protein, putative similar to phi-1 (phosphate-   | 1.37  |
| 256185_at   | <a href="#">AT1G51700</a> | induced gene) [Nicotiana tabacum] GI:3759184; contains Pfam           | 1.368 |
| 266834_s_at | <a href="#">AT2G30020</a> | expressed protein contains Pfam profile PF05093: Protein of           | 1.366 |
| 247691_at   | <a href="#">AT5G59720</a> | unknown function (DUF689)                                             | 1.364 |
| 254248_at   | <a href="#">AT4G23270</a> | diacylglycerol O-acyltransferase / acyl CoA:diacylglycerol            | 1.363 |
| 245329_at   | <a href="#">AT4G14365</a> | acyltransferase (DGAT) identical to gi:5050913, gi:6625553            | 1.358 |
| 246327_at   | <a href="#">AT1G16670</a> | 23.6 kDa mitochondrial small heat shock protein (HSP23.6-M)           | 1.355 |
| 260648_at   | <a href="#">AT1G08050</a> | contains Pfam profile PF00011: Hsp20/alpha crystallin family          | 1.351 |
|             |                           | UDP-glucuronosyl/UDP-glucosyl transferase family protein contains     |       |
|             |                           | Pfam profile: PF00201 UDP-glucuronosyl and UDP-glucosyl               |       |
|             |                           | expressed protein contains similarity to cotton fiber expressed       |       |
|             |                           | protein 1 [Gossypium hirsutum] gi 3264828 gb AAC33276                 |       |
|             |                           | Dof-type zinc finger domain-containing protein (ADO1) identical to    |       |
|             |                           | cDNA adof1 mRNA for dof zinc finger protein, GI:3608260;              |       |
|             |                           | protein phosphatase 2C, putative / PP2C, putative similar to protein  |       |
|             |                           | phosphatase 2C (GI:4587992){Arabidopsis thaliana}                     |       |
|             |                           | 18.1 kDa class I heat shock protein (HSP18.1-CI) identical to 18.2    |       |
|             |                           | kDa class I heat shock protein (HSP 18.2)                             |       |
|             |                           | protein kinase family protein contains Pfam PF00069: Protein          |       |
|             |                           | kinase domain                                                         |       |
|             |                           | zinc finger (C3HC4-type RING finger) family protein / ankyrin repeat  |       |
|             |                           | family protein contains Pfam profile: PF00097 zinc finger, C3HC4      |       |
|             |                           | protein kinase family protein contains protein kinase domain,         |       |
|             |                           | Pfam:PF00069; similar to receptor-like serine/threonine kinase        |       |
|             |                           | zinc finger (C3HC4-type RING finger) family protein low similarity to |       |
|             |                           | SP P79263 Inter-alpha-trypsin inhibitor heavy chain H4 precursor      |       |

|           |                           |                                                                                                                                                                                                  |       |
|-----------|---------------------------|--------------------------------------------------------------------------------------------------------------------------------------------------------------------------------------------------|-------|
| 253637_at | <a href="#">AT4G30390</a> | expressed protein                                                                                                                                                                                | 1.35  |
| 246931_at | <a href="#">AT5G25170</a> | expressed protein                                                                                                                                                                                | 1.347 |
| 264929_at | <a href="#">AT1G60730</a> | aldo/keto reductase family protein contains Pfam profile PF00248: oxidoreductase, aldo/keto reductase family                                                                                     | 1.346 |
| 252928_at | <a href="#">AT4G38940</a> | kelch repeat-containing F-box family protein low similarity to SKP1 interacting partner 6 [Arabidopsis thaliana] GI:10716957; contains                                                           | 1.343 |
| 248330_at | <a href="#">AT5G52810</a> | ornithine cyclodeaminase/mu-crystallin family protein contains Pfam PF02423: Ornithine cyclodeaminase/mu-crystallin family                                                                       | 1.341 |
| 258915_at | <a href="#">AT3G10640</a> | SNF7 family protein contains Pfam domain, PF03357: SNF7 family zinc finger (C3HC4-type RING finger) family protein contains Pfam                                                                 | 1.337 |
| 252422_at | <a href="#">AT3G47550</a> | domain, PF00097: Zinc finger, C3HC4 type (RING finger) ubiquitin-conjugating enzyme 17 (UBC17) E2; identical to                                                                                  | 1.323 |
| 246195_at | <a href="#">AT4G36410</a> | gi:2801446                                                                                                                                                                                       | 1.321 |
| 259841_at | <a href="#">AT1G52200</a> | expressed protein similar to PGPS/D12 [Petunia x hybrida] GI:4105794; contains Pfam profile PF04749: Protein of unknown                                                                          | 1.32  |
| 246870_at | <a href="#">AT5G26030</a> | ferrochelatase I identical to Swiss-Prot:P42043 ferrochelatase I, chloroplast/mitochondrial precursor (EC 4.99.1.1) (Protoheme ferro-                                                            | 1.318 |
| 253780_at | <a href="#">AT4G28400</a> | protein phosphatase 2C, putative / PP2C, putative protein phosphatase 2C-fission yeast, PIR2:S54297                                                                                              | 1.316 |
| 266231_at | <a href="#">AT2G02220</a> | leucine-rich repeat transmembrane protein kinase, putative                                                                                                                                       | 1.316 |
| 267300_at | <a href="#">AT2G30140</a> | UDP-glucuronosyl/UDP-glucosyl transferase family protein contains Pfam profile: PF00201 UDP-glucuronosyl and UDP-glucosyl                                                                        | 1.314 |
| 248713_at | <a href="#">AT5G48180</a> | kelch repeat-containing protein contains Pfam PF01344: Kelch motif (5 repeats) ;similar to Tip elongation aberrant protein 1 (Cell                                                               | 1.311 |
| 257822_at | <a href="#">AT3G25230</a> | peptidyl-prolyl cis-trans isomerase / FK506-binding protein (ROF1) identical to rotamase FKBP (ROF1) GB:U49453 [Arabidopsis                                                                      | 1.31  |
| 251400_at | <a href="#">AT3G60420</a> | expressed protein                                                                                                                                                                                | 1.307 |
| 247509_at | <a href="#">AT5G62020</a> | heat shock factor protein, putative (HSF6) / heat shock transcription factor, putative (HTSF6) identical to heat shock transcription factor                                                      | 1.306 |
| 252037_at | <a href="#">AT3G51920</a> | calmodulin-9 (CAM9) identical to calmodulin 9 GI:5825602 from [Arabidopsis thaliana]; contains Pfam profile PF00036: EF hand                                                                     | 1.303 |
| 253911_at | <a href="#">AT4G27300</a> | S-locus protein kinase, putative similar to receptor protein kinase [Ipomoea trifida] gi 836954 gb AAC23542; contains S-locus                                                                    | 1.303 |
| 267381_at | <a href="#">AT2G26190</a> | calmodulin-binding family protein contains Pfam profile PF00612: IQ calmodulin-binding motif                                                                                                     | 1.299 |
| 245272_at | <a href="#">AT4G17250</a> | expressed protein                                                                                                                                                                                | 1.298 |
| 250287_at | <a href="#">AT5G13330</a> | AP2 domain-containing transcription factor family protein similar to AP2 domain containing protein RAP2.6, Arabidopsis thaliana, [AT1G53430, leucine-rich repeat family protein / protein kinase | 1.293 |
| 260975_at | <a href="#">AT1G53430</a> | family protein contains Pfam domains PF00560: Leucine Rich                                                                                                                                       | 1.293 |

|             |                           |                                                                                                                                                                                                 |       |
|-------------|---------------------------|-------------------------------------------------------------------------------------------------------------------------------------------------------------------------------------------------|-------|
| 257805_at   | <a href="#">AT3G18830</a> | mannitol transporter, putative similar to mannitol transporter [ <i>Apium graveolens</i> var. <i>dulce</i> ] GI:12004316; contains Pfam profile                                                 | 1.287 |
| 267624_at   | <a href="#">AT2G39660</a> | protein kinase, putative similar to protein kinase gj 166809 gb AAA18853                                                                                                                        | 1.282 |
| 254890_at   | <a href="#">AT4G11600</a> | glutathione peroxidase, putative                                                                                                                                                                | 1.277 |
| 265737_at   | <a href="#">AT2G01180</a> | phosphatidic acid phosphatase family protein / PAP2 family protein similar to phosphatidic acid phosphatase 2a2 [ <i>Cavia porcellus</i> ]                                                      | 1.277 |
| 258665_at   | <a href="#">AT3G08710</a> | thioredoxin family protein similar to thioredoxin H-type GB:P29448 SP P29448 [ <i>Arabidopsis thaliana</i> ], Thioredoxin H-type 2 (TRX-H2)                                                     | 1.276 |
| 264000_at   | <a href="#">AT2G22500</a> | mitochondrial substrate carrier family protein contains Pfam profile: PF00153 mitochondrial carrier protein                                                                                     | 1.274 |
| 247240_at   | <a href="#">AT5G64660</a> | U-box domain-containing protein similar to immediate-early fungal elicitor protein CMPG1 [ <i>Petroselinum crispum</i> ] GI:14582200; MATE efflux family protein contains Pfam profile: PF01554 | 1.271 |
| 263403_at   | <a href="#">AT2G04040</a> | uncharacterized membrane protein family                                                                                                                                                         | 1.27  |
| 248040_at   | <a href="#">AT5G55970</a> | zinc finger (C3HC4-type RING finger) family protein contains Pfam profile: PF00097 zinc finger, C3HC4 type (RING finger)                                                                        | 1.266 |
| 252483_at   | <a href="#">AT3G46600</a> | scarecrow transcription factor family protein scarecrow-like 11 - <i>Arabidopsis thaliana</i> , EMBL:AF036307                                                                                   | 1.266 |
| 259749_at   | <a href="#">AT1G71100</a> | ribose 5-phosphate isomerase-related similar to ribose-5-phosphate isomerase GI:18654317 from [ <i>Spinacia oleracea</i> ]                                                                      | 1.263 |
| 265276_at   | <a href="#">AT2G28400</a> | expressed protein contains Pfam profile PF04520: Protein of unknown function, DUF584                                                                                                            | 1.262 |
| 249339_at   | <a href="#">AT5G41100</a> | expressed protein                                                                                                                                                                               | 1.261 |
| 254532_at   | <a href="#">AT4G19660</a> | ankyrin repeat family protein / BTB/POZ domain-containing protein contains Pfam domain, PF00023: Ankyrin repeat and Pfam domain, [AT5G66910, disease resistance protein (CC-NBS-LRR class),     | 1.261 |
| 247065_s_at | <a href="#">AT5G66910</a> | putative domain signature CC-NBS-LRR exists, suggestive of a galactinol synthase, putative similar to galactinol synthase, isoform                                                              | 1.257 |
| 263320_at   | <a href="#">AT2G47180</a> | GolS-1 GI:5608497 from [ <i>Ajuga reptans</i> ]                                                                                                                                                 | 1.257 |
| 245642_at   | <a href="#">AT1G25275</a> | expressed protein                                                                                                                                                                               | 1.251 |
| 250580_at   | <a href="#">AT5G07440</a> | glutamate dehydrogenase 2 (GDH2) identical to glutamate dehydrogenase 2 (GDH 2) [ <i>Arabidopsis thaliana</i> ] SWISS-                                                                          | 1.251 |
| 255895_at   | <a href="#">AT1G17990</a> | [AT1G17990, 12-oxophytodienoate reductase, putative similar to OPR1 [GI:3882355] and OPR2 [GI:3882356]];[AT1G18020, 12-                                                                         | 1.251 |
| 253104_at   | <a href="#">AT4G36010</a> | pathogenesis-related thaumatin family protein similar to receptor serine/threonine kinase PR5K [ <i>Arabidopsis thaliana</i> ] GI:1235680;                                                      | 1.25  |
| 245119_at   | <a href="#">AT2G41640</a> | expressed protein contains Pfam domain, PF04577: Protein of unknown function (DUF563)                                                                                                           | 1.243 |
| 250098_at   | <a href="#">AT5G17350</a> | expressed protein                                                                                                                                                                               | 1.241 |
| 254424_at   | <a href="#">AT4G21510</a> | F-box family protein contains Pfam PF00646: F-box domain; similar to SKP1 interacting partner 2 (SKIP2) TIGR_Ath1:At5g67250                                                                     | 1.241 |

|             |                           |                                                                                                                                                                                                    |       |
|-------------|---------------------------|----------------------------------------------------------------------------------------------------------------------------------------------------------------------------------------------------|-------|
| 255844_at   | <a href="#">AT2G33580</a> | protein kinase family protein / peptidoglycan-binding LysM domain containing protein protein kinase [Arabidopsis thaliana] GI:2852449; [AT1G66500, zinc finger (C2H2-type) family protein contains | 1.237 |
| 256356_s_at | <a href="#">AT1G66500</a> | Prosites PS00028: Zinc finger, C2H2 type, domain; similar to S-locus cinnamoyl-CoA reductase, putative identical to CCR2                                                                           | 1.237 |
| 261899_at   | <a href="#">AT1G80820</a> | (GI:12407990), similar to cinnamoyl CoA reductase from rhomboid family protein / zinc finger protein-related contains Pfam                                                                         | 1.231 |
| 258406_at   | <a href="#">AT3G17611</a> | profiles PF01694: Rhomboid family, PF00641: Zn-finger in Ran sucrose transporter / sucrose-proton symporter (SUC3) identical to                                                                    | 1.23  |
| 266792_at   | <a href="#">AT2G02860</a> | sucrose transporter [Arabidopsis thaliana] GI:8052190; similar to [AT4G02520, glutathione S-transferase, putative];[AT2G02930,                                                                     | 1.228 |
| 266746_s_at | <a href="#">AT4G02520</a> | glutathione S-transferase, putative] disease resistance protein (CC-NBS-LRR class), putative domain                                                                                                | 1.226 |
| 250829_at   | <a href="#">AT5G04720</a> | signature CC-NBS-LRR exists, suggestive of a disease resistance UDP-glucuronosyl/UDP-glucosyl transferase family protein contains                                                                  | 1.222 |
| 253281_at   | <a href="#">AT4G34138</a> | Pfam profile: PF00201 UDP-glucuronosyl and UDP-glucosyl beta-amylase, putative / 1,4-alpha-D-glucon maltohydrolase,                                                                                | 1.222 |
| 256861_at   | <a href="#">AT3G23920</a> | putative similar to beta-amylase enzyme [Arabidopsis thaliana] branched-chain amino acid aminotransferase 2 / branched-chain                                                                       | 1.221 |
| 264524_at   | <a href="#">AT1G10070</a> | amino acid transaminase 2 (BCAT2) identical to SP Q9M439 transferase family protein similar to anthranilate N-                                                                                     | 1.214 |
| 250549_at   | <a href="#">AT5G07860</a> | hydroxycinnamoyl/benzoyltransferase, Dianthus caryophyllus glutamyl-tRNA reductase 2 / GluTR (HEMA2) identical to glutamyl-                                                                        | 1.213 |
| 264660_at   | <a href="#">AT1G09940</a> | tRNA reductase 2, chloroplast [SP P49294] bZIP transcription factor family protein similar to common plant                                                                                         | 1.211 |
| 251237_at   | <a href="#">AT3G62420</a> | regulatory factor 6 GI:9650826 from [Petroselinum crispum] protein kinase, putative similar to protein kinase [Lophopyrum                                                                          | 1.21  |
| 248821_at   | <a href="#">AT5G47070</a> | elongatum] gi 13022177 gb AAK11674 glutathione S-transferase, putative similar to glutathione transferase                                                                                          | 1.208 |
| 260746_at   | <a href="#">AT1G78380</a> | GI:2853219 from [Carica papaya] WRKY family transcription factor similar to DNA-binding protein 2                                                                                                  | 1.208 |
| 254652_at   | <a href="#">AT4G18170</a> | GI:4322940 from [Nicotiana tabacum]; contains Pfam profile:                                                                                                                                        | 1.207 |
| 258201_at   | <a href="#">AT3G13910</a> | expressed protein zinc finger (AN1-like) family protein contains Pfam domain,                                                                                                                      | 1.207 |
| 252009_at   | <a href="#">AT3G52800</a> | PF01428: AN1-like Zinc finger epsin N-terminal homology (ENTH) domain-containing protein /                                                                                                         | 1.205 |
| 252851_at   | <a href="#">AT4G40080</a> | clathrin assembly protein-related contains Pfam PF01417: ENTH                                                                                                                                      | 1.204 |
| 256793_at   | <a href="#">AT3G22160</a> | VQ motif-containing protein contains PF05678: VQ motif 4-hydroxyphenylpyruvate dioxygenase (HPD) identical to 4-                                                                                   | 1.204 |
| 262635_at   | <a href="#">AT1G06570</a> | hydroxyphenylpyruvate dioxygenase (HPD) SP:P93836 heat shock cognate 70 kDa protein 3 (HSC70-3) (HSP70-3)                                                                                          | 1.204 |
| 258979_at   | <a href="#">AT3G09440</a> | identical to SP O65719 Heat shock cognate 70 kDa protein 3 phospholipid-transporting ATPase 1 / aminophospholipid flippase 1                                                                       | 1.197 |
| 250818_at   | <a href="#">AT5G04930</a> | / magnesium-ATPase 1 (ALA1) nearly identical to SP P98204                                                                                                                                          | 1.187 |

|           |                           |                                                                                                                                                                                                |       |
|-----------|---------------------------|------------------------------------------------------------------------------------------------------------------------------------------------------------------------------------------------|-------|
| 260314_at | <a href="#">AT1G63830</a> | proline-rich family protein contains proline-rich extensin domains, INTERPRO:IPR002965; contains 1 predicted transmembrane expressed protein similar to TolB protein precursor (SP:Q9ZDM5)     | 1.186 |
| 262505_at | <a href="#">AT1G21680</a> | {Rickettsia prowazekii}; ESTs gb N96028, gb F14286, gb T20680, NF-X1 type zinc finger family protein contains Pfam PF01422: NF-X1 type zinc finger; similar to transcriptional repressor NF-X1 | 1.184 |
| 264460_at | <a href="#">AT1G10170</a> | calcineurin B-like protein 1 (CBL1) identical to calcineurin B-like protein 1 (GI:3309082) [Arabidopsis thaliana]                                                                              | 1.184 |
| 245251_at | <a href="#">AT4G17615</a> |                                                                                                                                                                                                | 1.182 |
| 252533_at | <a href="#">AT3G46110</a> | expressed protein                                                                                                                                                                              | 1.182 |
| 257785_at | <a href="#">AT3G26980</a> | ubiquitin family protein contains INTERPRO:IPR000626 ubiquitin domain                                                                                                                          | 1.18  |
| 258114_at | <a href="#">AT3G14650</a> | [AT3G14650, cytochrome P450, putative similar to GB:Q05047 from [Catharanthus roseus]];[AT3G14660, cytochrome P450, 26.5 kDa class I small heat shock protein-like (HSP26.5-P)                 | 1.178 |
| 262148_at | <a href="#">AT1G52560</a> | contains Pfam profile: PF00011 Hsp20/alpha crystallin family; zinc finger (C3HC4-type RING finger) family protein contains Pfam                                                                | 1.178 |
| 247125_at | <a href="#">AT5G66070</a> | profile: PF00097 zinc finger, C3HC4 type (RING finger) protein kinase family protein contains protein kinase domain, Pfam:PF00069                                                              | 1.174 |
| 264841_at | <a href="#">AT1G03740</a> | zinc finger (C3HC4-type RING finger) family protein contains Pfam                                                                                                                              | 1.173 |
| 253324_at | <a href="#">AT4G33940</a> | profile: PF00097 zinc finger, C3HC4 type (RING finger) transferase family protein similar to anthranilate N-                                                                                   | 1.168 |
| 249188_at | <a href="#">AT5G42830</a> | hydroxycinnamoyl/benzoyltransferase, Dianthus caryophyllus protein transport protein SEC61 gamma subunit, putative similar to                                                                  | 1.167 |
| 254083_at | <a href="#">AT4G24920</a> | Swiss-Prot:Q19967 protein transport protein SEC61 gamma [AT1G67930, Golgi transport complex protein-related similar to                                                                         | 1.166 |
| 260005_at | <a href="#">AT1G67930</a> | golgi transport complex protein (GTC90) GB:5453670 [Homo ovate family protein 57% similar to ovate protein (GI:23429649)                                                                       | 1.164 |
| 267493_at | <a href="#">AT2G30400</a> | [Lycopersicon esculentum]; contains TIGRFAM TIGR01568 : L-allo-threonine aldolase-related similar to L-allo-threonine aldolase                                                                 | 1.16  |
| 264777_at | <a href="#">AT1G08630</a> | (EC 4.1.2.-) (L-allo-TA) (L-allo-threonine acetaldehyde-lyase) oxidoreductase, 2OG-Fe(II) oxygenase family protein similar to                                                                  | 1.157 |
| 246098_at | <a href="#">AT5G20400</a> | naringenin,2-oxoglutarate 3-dioxygenase (flavonone-3-hydroxylase) touch-responsive protein / calmodulin-related protein 2, touch-                                                              | 1.156 |
| 249583_at | <a href="#">AT5G37770</a> | induced (TCH2) identical to calmodulin-related protein 2,touch-glycosyl transferase family 20 protein / trehalose-phosphatase                                                                  | 1.152 |
| 266072_at | <a href="#">AT2G18700</a> | family protein similar to trehalose-6-phosphate synthase SL-TPS/P glutaredoxin family protein contains INTERPRO Domain                                                                         | 1.151 |
| 265067_at | <a href="#">AT1G03850</a> | IPR002109, Glutaredoxin (thioltransferase)                                                                                                                                                     | 1.15  |
| 262677_at | <a href="#">AT1G75860</a> | expressed protein                                                                                                                                                                              | 1.148 |
| 267289_at | <a href="#">AT2G23770</a> | protein kinase family protein / peptidoglycan-binding LysM domain containing protein contains Pfam domains, PF00069: Protein                                                                   | 1.147 |
| 267069_at | <a href="#">AT2G41010</a> | VQ motif-containing protein contains PF05678: VQ motif                                                                                                                                         | 1.144 |

|           |                           |                                                                                                                                                                                                |       |
|-----------|---------------------------|------------------------------------------------------------------------------------------------------------------------------------------------------------------------------------------------|-------|
| 248698_at | <a href="#">AT5G48380</a> | leucine-rich repeat family protein / protein kinase family protein contains protein kinase domain, Pfam:PF00069; contains leucine-ATP-NAD kinase family protein contains Pfam domain, PF01513: | 1.14  |
| 256968_at | <a href="#">AT3G21070</a> | ATP-NAD kinase protein kinase, putative similar to protein kinase [Lophopyrum elongatum] gi 13022177 gb AAK11674                                                                               | 1.136 |
| 258650_at | <a href="#">AT3G09830</a> | WRKY family transcription factor DNA-binding protein 4 WRKY4 - Nicotiana tabacum, EMBL:AF193771                                                                                                | 1.134 |
| 251705_at | <a href="#">AT3G56400</a> | amino acid transporter family protein low similarity to N system amino acids transporter NAT-1 [Mus musculus] GI:7406950;                                                                      | 1.133 |
| 251722_at | <a href="#">AT3G56200</a> |                                                                                                                                                                                                | 1.132 |
| 254103_at | <a href="#">AT4G25030</a> | expressed protein drought-responsive family protein similar to drought-induced mRNA, Di19 [Arabidopsis thaliana] gi 469110 emb CAA55321                                                        | 1.132 |
| 255504_at | <a href="#">AT4G02200</a> |                                                                                                                                                                                                | 1.129 |
| 265327_at | <a href="#">AT2G18210</a> | expressed protein                                                                                                                                                                              | 1.128 |
| 248868_at | <a href="#">AT5G46780</a> | VQ motif-containing protein contains PF05678: VQ motif                                                                                                                                         | 1.127 |
| 245247_at | <a href="#">AT4G17230</a> | scarecrow-like transcription factor 13 (SCL13)                                                                                                                                                 | 1.126 |
| 263228_at | <a href="#">AT1G30700</a> | FAD-binding domain-containing protein similar to SP P30986 reticuline oxidase precursor (Berberine-bridge-forming enzyme)                                                                      | 1.124 |
| 267230_at | <a href="#">AT2G44080</a> | expressed protein                                                                                                                                                                              | 1.123 |
| 257407_at | <a href="#">AT1G27100</a> | expressed protein contains Pfam profile: PF04601 protein of unknown function (DUF569)                                                                                                          | 1.12  |
| 258275_at | <a href="#">AT3G15760</a> | expressed protein                                                                                                                                                                              | 1.119 |
| 259626_at | <a href="#">AT1G42990</a> | bZIP transcription factor family protein contains Pfam profile: PF00170: bZIP transcription factor                                                                                             | 1.119 |
| 262165_at | <a href="#">AT1G75020</a> | phospholipid/glycerol acyltransferase family protein contains Pfam profile: PF01553 Acyltransferase                                                                                            | 1.119 |
| 263704_at | <a href="#">AT1G31130</a> | expressed protein                                                                                                                                                                              | 1.117 |
| 267486_at | <a href="#">AT2G02800</a> | protein kinase (APK2b) identical to protein kinase APK2b [Arabidopsis thaliana] gi 2852449 dbj BAA24695                                                                                        | 1.109 |
| 267537_at | <a href="#">AT2G41880</a> | guanylate kinase 1 (GK-1) identical to guanylate kinase (GK-1) [Arabidopsis thaliana] gi 7861795 gb AAF70408                                                                                   | 1.108 |
| 250339_at | <a href="#">AT5G11670</a> | malate oxidoreductase, putative similar to NADP-dependent malic enzyme (EC 1.1.1.40) (NADP-ME) (SP P12628) {Phaseolus expressed protein similar to TolB protein precursor (SP:P50601)          | 1.107 |
| 262503_at | <a href="#">AT1G21670</a> | {Pseudomonas aeruginosa}                                                                                                                                                                       | 1.105 |
| 248665_at | <a href="#">AT5G48655</a> | zinc finger (C3HC4-type RING finger) family protein contains Pfam profile: PF00097 zinc finger, C3HC4 type (RING finger)                                                                       | 1.104 |
| 258683_at | <a href="#">AT3G08760</a> | protein kinase family protein contains protein kinase domain, Pfam:PF00069                                                                                                                     | 1.102 |



|             |                           |                                                                                                                                     |       |
|-------------|---------------------------|-------------------------------------------------------------------------------------------------------------------------------------|-------|
| 252939_at   | <a href="#">AT4G39230</a> | isoflavone reductase, putative similar to allergenic isoflavone reductase-like protein Bet v 6.0102 [Betula pendula][GI:10764491];  | 1.1   |
| 256221_at   | <a href="#">AT1G56300</a> | DNAJ heat shock N-terminal domain-containing protein similar to SP Q9QYI7 DnaJ homolog subfamily B member 8 Mus musculus;           | 1.099 |
| 264867_at   | <a href="#">AT1G24150</a> | formin homology 2 domain-containing protein / FH2 domain-containing protein contains formin homology 2 domain,                      | 1.09  |
| 260387_at   | <a href="#">AT1G74100</a> | sulfotransferase family protein similar to SP P52837 Flavonol 4'-sulfotransferase (EC 2.8.2.-) (F4-ST) {Flaveria chloraefolia};     | 1.089 |
| 253161_at   | <a href="#">AT4G35770</a> | senescence-associated protein (SEN1) identical to senescence-associated protein GI:1046270 from [Arabidopsis thaliana]              | 1.088 |
| 255230_at   | <a href="#">AT4G05390</a> | ferredoxin--NADP(+) reductase, putative / adrenodoxin reductase, putative strong similarity to SP P41345 Ferredoxin--NADP           | 1.088 |
| 263457_at   | <a href="#">AT2G22300</a> | ethylene-responsive calmodulin-binding protein, putative (SR1) identical to partial sequence of ethylene-induced calmodulin-binding | 1.088 |
| 253999_at   | <a href="#">AT4G26200</a> | 1-aminocyclopropane-1-carboxylate synthase, putative / ACC synthase, putative similar to ACC synthase from Malus x                  | 1.085 |
| 259018_at   | <a href="#">AT3G07390</a> | auxin-responsive protein / auxin-induced protein (AIR12) identical (with 7 residue gap) to auxin-induced protein AIR12 GI:11357190  | 1.082 |
| 251624_at   | <a href="#">AT3G57280</a> | expressed protein contains Pfam profile PF03647: Uncharacterised protein family (UPF0136)                                           | 1.075 |
| 258105_at   | <a href="#">AT3G23605</a> | UBX domain-containing protein contains Pfam profile PF00789: UBX domain                                                             | 1.073 |
| 266821_at   | <a href="#">AT2G44840</a> | ethylene-responsive element-binding protein, putative [AT1G25083, anthranilate synthase beta subunit, putative strong               | 1.072 |
| 247864_s_at | <a href="#">AT1G25083</a> | similarity to anthranilate synthase beta subunit GI:403434 from elongation factor 1B alpha-subunit 1 (eEF1Balpha1) identical to     | 1.07  |
| 250304_at   | <a href="#">AT5G12110</a> | elongation factor 1B alpha-subunit [Arabidopsis thaliana] glutaredoxin family protein contains INTERPRO Domain                      | 1.065 |
| 251196_at   | <a href="#">AT3G62950</a> | IPR002109, Glutaredoxin (thioltransferase)                                                                                          | 1.063 |
| 259980_at   | <a href="#">AT1G76520</a> | auxin efflux carrier family protein contains auxin efflux carrier domain, Pfam:PF03547                                              | 1.063 |
| 249393_at   | <a href="#">AT5G40170</a> | disease resistance family protein contains leucine rich-repeat (LRR) domains Pfam:PF00560, INTERPRO:IPR001611; similar to Cf-4      | 1.06  |
| 252993_at   | <a href="#">AT4G38540</a> | monooxygenase, putative (MO2) identical to GI:3426064                                                                               | 1.06  |
| 258173_at   | <a href="#">AT3G21630</a> | protein kinase family protein contains protein kinase domain, Pfam:PF00069                                                          | 1.059 |
| 261225_at   | <a href="#">AT1G20100</a> | expressed protein                                                                                                                   | 1.058 |
| 264580_at   | <a href="#">AT1G05340</a> | expressed protein                                                                                                                   | 1.058 |
| 263472_at   | <a href="#">AT2G31955</a> | molybdopterin biosynthesis protein, putative / molybdenum cofactor biosynthesis enzyme, putative 3' fragment; strong similarity to  | 1.056 |
| 247930_at   | <a href="#">AT5G57060</a> | expressed protein                                                                                                                   | 1.055 |

|           |                           |                                                                                                                                                                                                       |       |
|-----------|---------------------------|-------------------------------------------------------------------------------------------------------------------------------------------------------------------------------------------------------|-------|
| 251597_at | <a href="#">AT3G57750</a> | protein kinase, putative similar to wall-associated kinase 1 [Arabidopsis thaliana] gi 3549626 emb CAA08794; contains protein                                                                         | 1.055 |
| 255967_at | <a href="#">AT1G22280</a> | protein phosphatase 2C, putative / PP2C, putative similar to protein phosphatase type 2C GI:4336436 from [Lotus japonicus]                                                                            | 1.052 |
| 252214_at | <a href="#">AT3G50260</a> | AP2 domain-containing transcription factor, putative EREBP-3 homolog, Stylosanthes hamata, EMBL:U91982                                                                                                | 1.051 |
| 254665_at | <a href="#">AT4G18340</a> | glycosyl hydrolase family 17 protein similar to elicitor inducible chitinase Nt-SubE76 GI:11071974 from [Nicotiana tabacum]                                                                           | 1.048 |
| 263265_at | <a href="#">AT2G38820</a> | expressed protein contains Pfam profile PF04720: Protein of unknown function (DUF506)                                                                                                                 | 1.048 |
| 250692_at | <a href="#">AT5G06560</a> | expressed protein contains Pfam profile PF04576: Protein of unknown function, DUF593                                                                                                                  | 1.044 |
| 252470_at | <a href="#">AT3G46930</a> | protein kinase family protein contains protein kinase domain, Pfam:PF00069                                                                                                                            | 1.044 |
| 258351_at | <a href="#">AT3G17700</a> | cyclic nucleotide-binding transporter 1 / CNBT1 (CNGC20) identical to cyclic nucleotide-binding transporter 1 (CNBT1) GI:8131898 from DNAJ heat shock N-terminal domain-containing protein similar to | 1.043 |
| 261901_at | <a href="#">AT1G80920</a> | SP Q05646 Chaperone protein dnaJ Erysipelothrix rhusiopathiae, DNAJ heat shock N-terminal domain-containing protein (J11)                                                                             | 1.043 |
| 253125_at | <a href="#">AT4G36040</a> | identical to dnaJ heat shock protein J11 [Arabidopsis thaliana]                                                                                                                                       | 1.042 |
| 256183_at | <a href="#">AT1G51660</a> | mitogen-activated protein kinase kinase (MAPKK), putative (MKK4) identical to MAP kinase kinase 4 [Arabidopsis thaliana]                                                                              | 1.042 |
| 265440_at | <a href="#">AT2G20960</a> | expressed protein pEARLI 4 gene product [Arabidopsis thaliana] GI:871782                                                                                                                              | 1.04  |
| 251649_at | <a href="#">AT3G57330</a> | calcium-transporting ATPase, plasma membrane-type, putative / Ca <sup>2+</sup> -ATPase, putative (ACA11) identical to                                                                                 | 1.035 |
| 255110_at | <a href="#">AT4G08770</a> | peroxidase, putative identical to class III peroxidase ATP38 [Arabidopsis thaliana] gi 17530568 gb AAL40851; similar to                                                                               | 1.033 |
| 267154_at | <a href="#">AT2G30870</a> | [AT2G30870, glutathione S-transferase, putative supported by cDNA GI:443698 GB:D17673];[AT2G30880, pleckstrin homology                                                                                | 1.033 |
| 256633_at | <a href="#">AT3G28340</a> | galactinol synthase, putative                                                                                                                                                                         | 1.026 |
| 261957_at | <a href="#">AT1G64660</a> | Cys/Met metabolism pyridoxal-phosphate-dependent enzyme family protein similar to SP P13254 Methionine gamma-lyase (EC                                                                                | 1.026 |
| 254861_at | <a href="#">AT4G12040</a> | zinc finger (AN1-like) family protein contains Pfam domains, PF01428: AN1-like Zinc finger and PF01754: A20-like zinc finger                                                                          | 1.021 |
| 257866_at | <a href="#">AT3G17770</a> | dihydroxyacetone kinase family protein contains Pfam domains, PF02733: DAK1 domain and PF02734: DAK2 domain                                                                                           | 1.021 |
| 264304_at | <a href="#">AT1G78895</a> | expressed protein                                                                                                                                                                                     | 1.02  |
| 249895_at | <a href="#">AT5G22500</a> | acyl CoA reductase, putative / male-sterility protein, putative similar to acyl CoA reductase [Simmondsia chinensis] GI:5020215;                                                                      | 1.018 |
| 258094_at | <a href="#">AT3G14690</a> | cytochrome P450, putative similar to GB:Q05047 from [Catharanthus roseus]                                                                                                                             | 1.018 |
| 248676_at | <a href="#">AT5G48850</a> | male sterility MS5 family protein similar to male sterility MS5 [Arabidopsis thaliana] GI:3859112; contains Pfam profile PF00515                                                                      | 1.015 |

|           |                           |                                                                                                                                         |        |
|-----------|---------------------------|-----------------------------------------------------------------------------------------------------------------------------------------|--------|
| 261506_at | <a href="#">AT1G71697</a> | choline kinase, putative similar to GmCK2p choline kinase<br>gj 1438881 gb AAC49375                                                     | 1.013  |
| 252415_at | <a href="#">AT3G47340</a> | asparagine synthetase 1 [glutamine-hydrolyzing] / glutamine-<br>dependent asparagine synthetase 1 (ASN1) identical to SP P49078         | 1.012  |
| 252652_at | <a href="#">AT3G44720</a> | prephenate dehydratase family protein similar to bacterial PheA<br>gene products                                                        | 1.008  |
| 251144_at | <a href="#">AT5G01210</a> | transferase family protein contains Pfam profile PF02458<br>transferase family                                                          | 1.006  |
| 254707_at | <a href="#">AT4G18010</a> | inositol polyphosphate 5-phosphatase II (IP5PII) nearly identical to<br>inositol polyphosphate 5-phosphatase II [Arabidopsis thaliana]  | 1.005  |
| 246214_at | <a href="#">AT4G36990</a> | heat shock factor protein 4 (HSF4) / heat shock transcription factor<br>4 (HSTF4) identical to heat shock transcription factor 4 (HSF4) | 1.004  |
| 264568_at | <a href="#">AT1G05150</a> | calcium-binding EF hand family protein low similarity to O-linked<br>GlcNAc transferase [Homo sapiens] GI:2266994; contains Pfam        | -1     |
| 261594_at | <a href="#">AT1G33240</a> | trihelix DNA-binding protein, putative similar to GTL1 [Arabidopsis<br>thaliana] GI:2664198                                             | -1.001 |
| 245947_at | <a href="#">AT5G19530</a> | spermine/spermidine synthase family protein similar to SP P09158<br>Spermidine synthase (EC 2.5.1.16) (Putrescine                       | -1.002 |
| 263333_at | <a href="#">AT2G03890</a> | phosphatidylinositol 3- and 4-kinase family protein low similarity to<br>phosphatidylinositol 4-kinase type-II beta [Homo sapiens]      | -1.002 |
| 264315_at | <a href="#">AT1G70370</a> | BURP domain-containing protein / polygalacturonase, putative<br>similar to polygalacturonase isoenzyme 1 beta subunit                   | -1.002 |
| 264770_at | <a href="#">AT1G23030</a> | armadillo/beta-catenin repeat family protein / U-box domain-<br>containing protein contains Pfam domain, PF00514: Armadillo/beta-       | -1.002 |
| 250801_at | <a href="#">AT5G04960</a> | pectinesterase family protein contains Pfam profile: PF01095<br>pectinesterase                                                          | -1.009 |
| 250892_at | <a href="#">AT5G03760</a> | glycosyl transferase family 2 protein similar to beta-(1-3)-glucosyl<br>transferase GB:AAC62210 GI:3687658 from [Bradyrhizobium         | -1.02  |
| 262045_at | <a href="#">AT1G80240</a> | expressed protein contains Pfam profile PF04862: Protein of<br>unknown function, DUF642                                                 | -1.02  |
| 267619_at | <a href="#">AT2G26730</a> | leucine-rich repeat transmembrane protein kinase, putative<br>nodulin MtN21 family protein similar to MtN21 GB:CAA75575                 | -1.021 |
| 262951_at | <a href="#">AT1G75500</a> | GI:2598575 from (Medicago truncatula) (Mol. Plant Microbe<br>invertase/pectin methylesterase inhibitor family protein low similarity    | -1.024 |
| 264898_at | <a href="#">AT1G23205</a> | to pectinesterase from Phaseolus vulgaris SP Q43111,<br>expressed protein identical to senescence-associated protein                    | -1.035 |
| 251169_at | <a href="#">AT3G63210</a> | SAG102 (GI::22331931) [Arabidopsis thaliana] (unpublished);<br>phosphate transporter, putative (PHO1) identical to PHO1 protein         | -1.044 |
| 258293_at | <a href="#">AT3G23430</a> | [Arabidopsis thaliana] GI:20069032; supporting cDNA<br>expressed protein similar to endosome-associated protein                         | -1.047 |
| 262871_at | <a href="#">AT1G65010</a> | (GI:1016368) [Homo sapiens]; similar to Centromeric protein E                                                                           | -1.052 |
| 253849_at | <a href="#">AT4G28080</a> | expressed protein<br>transferase family protein similar to anthranilate N-                                                              | -1.069 |
| 252199_at | <a href="#">AT3G50270</a> | hydroxycinnamoyl/benzoyltransferase, Dianthus caryophyllus                                                                              | -1.072 |

|             |                           |                                                                                                                                                                                                                                                                   |        |
|-------------|---------------------------|-------------------------------------------------------------------------------------------------------------------------------------------------------------------------------------------------------------------------------------------------------------------|--------|
| 246275_at   | <a href="#">AT4G36540</a> | basic helix-loop-helix (bHLH) family protein contains Pfam domain, PF00010: Helix-loop-helix DNA-binding domain                                                                                                                                                   | -1.074 |
| 251174_at   | <a href="#">AT3G63200</a> | patatin-related low similarity to patatin-like latex protein allergen Hev b 7 - Hevea brasiliensis, EMBL:AF113546; contains patatin                                                                                                                               | -1.074 |
| 260618_at   | <a href="#">AT1G53230</a> | TCP family transcription factor 3 (TCP3) identical to transcription factor 3 (TCP3) [Arabidopsis thaliana] (GI:3243274); similar to expressed protein contains Pfam profiles: PF04782: protein of unknown function (DUF632), PF04783: protein of unknown function | -1.074 |
| 251413_at   | <a href="#">AT3G60320</a> | jacalin lectin family protein similar to myosinase-binding protein homolog [Arabidopsis thaliana] GI:2997767; contains Pfam profile                                                                                                                               | -1.079 |
| 249675_at   | <a href="#">AT5G35940</a> | subtilisin-like protease (AIR3) almost identical to subtilisin-like protease AIR3 GI:4218991 from [Arabidopsis thaliana], missing 200                                                                                                                             | -1.081 |
| 263406_at   | <a href="#">AT2G04160</a> | glycosyl hydrolase family 1 protein contains Pfam PF00232 : Glycosyl hydrolase family 1 domain; TIGRFAM TIGR01233: 6-                                                                                                                                             | -1.082 |
| 259173_at   | <a href="#">AT3G03640</a> | nicotianamine synthase, putative similar to nicotianamine synthase [Lycopersicon esculentum][GI:4753801], nicotianamine synthase 2                                                                                                                                | -1.09  |
| 259632_at   | <a href="#">AT1G56430</a> | [AT1G66280, glycosyl hydrolase family 1 protein contains Pfam PF00232 : Glycosyl hydrolase family 1 domain; TIGRFAM                                                                                                                                               | -1.093 |
| 260130_s_at | <a href="#">AT1G66280</a> | xyloglucan:xyloglucosyl transferase, putative / xyloglucan endotransglycosylase, putative / endo-xyloglucan transferase,                                                                                                                                          | -1.094 |
| 263841_at   | <a href="#">AT2G36870</a> | GDSL-motif lipase/hydrolase family protein similar to family II lipase EXL3 (GI:15054386), EXL1 (GI:15054382), EXL2 (GI:15054384)                                                                                                                                 | -1.101 |
| 253736_at   | <a href="#">AT4G28780</a> | auxin transport protein, putative (PIN3) similar to auxin transport protein [Arabidopsis thaliana] gi 5817301 gb AAD52695                                                                                                                                         | -1.101 |
| 262263_at   | <a href="#">AT1G70940</a> | [AT5G49080, proline-rich extensin-like family protein contains proline-rich extensin domains,                                                                                                                                                                     | -1.101 |
| 263552_x_at | <a href="#">AT5G49080</a> | naringenin 3-dioxygenase / flavanone 3-hydroxylase (F3H) identical to GI:3790548                                                                                                                                                                                  | -1.101 |
| 252123_at   | <a href="#">AT3G51240</a> |                                                                                                                                                                                                                                                                   | -1.125 |
| 262598_at   | <a href="#">AT1G15260</a> | expressed protein EST gb N65467 comes from this gene                                                                                                                                                                                                              | -1.127 |
| 266131_at   | <a href="#">AT2G45160</a> | scarecrow transcription factor family protein                                                                                                                                                                                                                     | -1.127 |
| 253582_at   | <a href="#">AT4G30670</a> | expressed protein                                                                                                                                                                                                                                                 | -1.132 |
| 247914_at   | <a href="#">AT5G57530</a> | [AT5G57530, xyloglucan:xyloglucosyl transferase, putative / xyloglucan endotransglycosylase, putative / endo-xyloglucan                                                                                                                                           | -1.137 |
| 259525_at   | <a href="#">AT1G12560</a> | expansin, putative (EXP7) similar to expansin GI:2828241 from [Brassica napus]; alpha-expansin gene family, PMID:11641069                                                                                                                                         | -1.146 |
| 255632_at   | <a href="#">AT4G00680</a> | actin-depolymerizing factor, putative strong similarity to SP P30175 Actin-depolymerizing factor (ADF) {Lilium longiflorum}; contains                                                                                                                             | -1.156 |
| 247162_at   | <a href="#">AT5G65730</a> | xyloglucan:xyloglucosyl transferase, putative / xyloglucan endotransglycosylase, putative / endo-xyloglucan transferase,                                                                                                                                          | -1.158 |
| 265471_at   | <a href="#">AT2G37130</a> | peroxidase 21 (PER21) (P21) (PRXR5) identical to SP Q42580 Peroxidase 21 precursor (EC 1.11.1.7) (Atperox P21) (PRXR5)                                                                                                                                            | -1.171 |
| 254820_s_at | <a href="#">AT4G12510</a> | [AT4G12510, protease inhibitor/seed storage/lipid transfer protein (LTP) family protein similar to 14 kDa polypeptide [Catharanthus                                                                                                                               | -1.175 |

|             |                           |                                                                                                                                          |        |
|-------------|---------------------------|------------------------------------------------------------------------------------------------------------------------------------------|--------|
| 247645_at   | <a href="#">AT5G60530</a> | late embryogenesis abundant protein-related / LEA protein-related similar to late embryogenesis abundant protein [Picea glauca]          | -1.184 |
| 259786_at   | <a href="#">AT1G29660</a> | GDSL-motif lipase/hydrolase family protein low similarity to family II lipase EXL1 [Arabidopsis thaliana] GI:15054382; contains InterPro | -1.189 |
| 260770_at   | <a href="#">AT1G49220</a> | [AT1G49220, zinc finger (C3HC4-type RING finger) family protein contains Pfam domain PF00097: Zinc finger, C3HC4 type (RING              | -1.193 |
| 260950_s_at | <a href="#">AT1G06090</a> | [AT1G06090, fatty acid desaturase family protein similar to delta 9 acyl-lipid desaturase GB:BAA25180 GI:2970034 (ADS1) from             | -1.203 |
| 261562_at   | <a href="#">AT1G01750</a> | actin-depolymerizing factor, putative strong similarity to SP P30175 Actin-depolymerizing factor (ADF) {Lilium longiflorum}; contains    | -1.204 |
| 250533_at   | <a href="#">AT5G08640</a> | flavonol synthase 1 (FLS1) identical to SP Q96330; contains PF03171 2OG-Fe(II) oxygenase superfamily                                     | -1.23  |
| 251843_x_at | <a href="#">AT3G54590</a> | proline-rich extensin-like family protein contains proline-rich extensin domains, INTERPRO:IPR002965                                     | -1.233 |
| 246510_at   | <a href="#">AT5G15410</a> | cyclic nucleotide-regulated ion channel / cyclic nucleotide-gated channel (CNGC2) identical to cyclic nucleotide-gated cation            | -1.243 |
| 253495_at   | <a href="#">AT4G31850</a> | [AT4G31850, pentatricopeptide (PPR) repeat-containing protein contains Pfam profile PF01535: PPR repeat];[AT4G31860, protein             | -1.253 |
| 256352_at   | <a href="#">AT1G54970</a> | proline-rich family protein similar to proline-rich protein GI:170048 from [Glycine max]                                                 | -1.255 |
| 253667_at   | <a href="#">AT4G30170</a> | peroxidase, putative identical to peroxidase ATP8a [Arabidopsis thaliana] gi 1546706 emb CAA67361                                        | -1.256 |
| 258080_at   | <a href="#">AT3G25930</a> | universal stress protein (USP) family protein contains Pfam PF00582: universal stress protein family                                     | -1.303 |
| 257297_at   | <a href="#">AT3G28040</a> | leucine-rich repeat transmembrane protein kinase, putative contains Pfam profiles: PF00560 leucine rich repeat, PF00069                  | -1.312 |
| 265050_at   | <a href="#">AT1G52070</a> | jacalin lectin family protein similar to myrosinase-binding protein homolog [Arabidopsis thaliana] GI:2997767; contains Pfam profile     | -1.32  |
| 254550_at   | <a href="#">AT4G19690</a> | iron-responsive transporter (IRT1) identical to Fe(II) transport protein [Arabidopsis thaliana] gi 1353266 gb AAB01678; member of        | -1.396 |
| 253255_at   | <a href="#">AT4G34760</a> | auxin-responsive family protein auxin-induced protein X15, Glycine max, PIR2:JQ1097                                                      | -1.415 |
| 260557_at   | <a href="#">AT2G43610</a> | glycoside hydrolase family 19 protein similar to chitinase GI:17799 from [Brassica napus]; contains Pfam profiles PF00182: Chitinase     | -1.46  |
| 256751_at   | <a href="#">AT3G27170</a> | chloride channel protein (CLC-b) identical to CLC-b chloride channel protein GB:CAA96058 from [Arabidopsis thaliana] (J. Biol.           | -1.471 |
| 259276_at   | <a href="#">AT3G01190</a> | peroxidase 27 (PER27) (P27) (PRXR7) identical to SP Q43735 Peroxidase 27 precursor (EC 1.11.1.7) (Atperox P27) (PRXR7)                   | -1.481 |
| 261500_at   | <a href="#">AT1G28400</a> | expressed protein similar to E6 (GI:1000090) [Gossypium barbadense]                                                                      | -1.488 |
| 252238_at   | <a href="#">AT3G49960</a> | peroxidase, putative identical to peroxidase ATP21a [Arabidopsis thaliana] gi 1546696 emb CAA67339                                       | -1.489 |
| 249477_s_at | <a href="#">AT5G38940</a> | [AT5G38940, germin-like protein, putative similar to germin-like portein GLP9 [SP Q9LEA7]; contains PS00725 Germin family                | -1.539 |
| 250207_at   | <a href="#">AT5G13930</a> | chalcone synthase / naringenin-chalcone synthase identical to SP P13114                                                                  | -1.571 |

|             |                           |                                                                                                                                        |        |
|-------------|---------------------------|----------------------------------------------------------------------------------------------------------------------------------------|--------|
| 251226_at   | <a href="#">AT3G62680</a> | proline-rich family protein contains proline-rich region, INTERPRO:IPR000694                                                           | -1.63  |
| 259790_s_at | <a href="#">AT1G29430</a> | auxin-responsive family protein similar to auxin-induced protein 10a 6B (SP:P33083) [Glycine max]                                      | -1.689 |
| 259328_at   | <a href="#">AT3G16440</a> | jacalin lectin family protein contains Pfam profile: PF01419 jacalin-like lectin domain; similar to myrosinase-binding protein homolog | -1.73  |
| 265102_at   | <a href="#">AT1G30870</a> | cationic peroxidase, putative similar to cationic peroxidase (gj1232069); similar to EST gb A1100412                                   | -1.854 |
| 247871_at   | <a href="#">AT5G57530</a> | [AT5G57530, xyloglucan:xyloglucosyl transferase, putative / xyloglucan endotransglycosylase, putative / endo-xyloglucan                | -1.862 |
| 252833_at   | <a href="#">AT4G40090</a> | arabinogalactan-protein (AGP3) InDels between the genome sequence and the cDNA prevent identical translations from being               | -1.922 |
| 248636_at   | <a href="#">AT5G49080</a> | proline-rich extensin-like family protein contains proline-rich extensin domains, INTERPRO:IPR002965                                   | -1.946 |
| 264014_at   | <a href="#">AT2G21210</a> | auxin-responsive protein, putative similar to small auxin-up regulated protein SAUR (GI:3043536) [Raphanus sativus]                    | -1.977 |
| 252972_at   | <a href="#">AT4G38840</a> | auxin-responsive protein, putative auxin-inducible SAUR gene, Raphanus sativus, AB000708                                               | -2.054 |
| 255516_at   | <a href="#">AT4G02270</a> | pollen Ole e 1 allergen and extensin family protein contains Pfam domain, PF01190: Pollen proteins Ole e I family                      | -2.087 |
| 250778_at   | <a href="#">AT5G05500</a> | pollen Ole e 1 allergen and extensin family protein contains Pfam domain, PF01190: Pollen proteins Ole e I family                      | -2.141 |
| 246652_at   | <a href="#">AT5G35190</a> | proline-rich extensin-like family protein contains proline-rich extensin domains, INTERPRO:IPR002965                                   | -2.185 |
| 250059_at   | <a href="#">AT5G17820</a> | peroxidase 57 (PER57) (P57) (PRXR10) identical to SP Q43729 Peroxidase 57 precursor (EC 1.11.1.7) (Atperox P57) (PRXR10)               | -2.243 |
| 254044_at   | <a href="#">AT4G25820</a> | xyloglucan:xyloglucosyl transferase / xyloglucan endotransglycosylase / endo-xyloglucan transferase (XTR9)                             | -2.504 |
| 246991_at   | <a href="#">AT5G67400</a> | peroxidase 73 (PER73) (P73) (PRXR11) identical to SP Q43873 Peroxidase 73 precursor (EC 1.11.1.7) (Atperox P73) (PRXR11)               | -2.619 |
| 264567_s_at | <a href="#">AT1G05250</a> | [AT1G05250, peroxidase, putative similar to peroxidase; peroxidase ATP11a [Arabidopsis thaliana]                                       | -2.669 |
| 262427_s_at | <a href="#">AT1G47600</a> | [AT1G47600, glycosyl hydrolase family 1 protein contains Pfam PF00232 : Glycosyl hydrolase family 1 domain; TIGRFAM                    | -3.136 |
| 253998_at   | <a href="#">AT4G26010</a> | peroxidase, putative peroxidase ATP13a - Arabidopsis thaliana, PID:e264765; identical to cDNA class III peroxidase ATP35,              | -3.261 |
